# Supplementary material for: Analysis of five complete genome sequences for members of the class Peribacteria in the recently recognized Peregrinibacteria bacterial phylum
Source: PeerJ. 2016 Jan 28;4:e1607. doi: 10.7717/peerj.1607 (PMC4736985; doi:10.7717/peerj.1607)
Supplement: Supplemental Information 1 [file peerj-04-1607-s001.xlsx]

## Sheet: Sheet1
Sample name	Sample Type	Date collected	Days since injection	Well name	Latitude/Longitude	Filter size (μm)	Groundwater filtered (L)	# high-quality paired DNA reads	high-quality DNA sequence (Gbp)	DNA assembly length (Mbp)	NCBI BioProject ID	SRA Accession number
A2	Groundwater - Before Oxygen injection	2012-08-02	0	CD01	39° 31′ 45″ N, 107° 46′ 20″ W	0.2μm	100	43087372	6.46	478	PRJNA288027	SRX1085362
B2	Groundwater - After Oxygen injection	2012-09-12	42	CD01	39° 31′ 45″ N, 107° 46′ 20″ W	0.2μm	112	42528122	6.38	483	PRJNA288027	SRX1085365
C2	Groundwater - After Oxygen injection	2012-10-24	84	CD01	39° 31′ 45″ N, 107° 46′ 20″ W	0.2μm	100	54309446	8.14	397	PRJNA288027	SRX1085368
D1	Groundwater - After Oxygen injection	2012-12-12	126	CD01	39° 31′ 45″ N, 107° 46′ 20″ W	0.1μm	110	48990966	7.35	368	PRJNA288027	SRX1085370
D2	Groundwater - After Oxygen injection	2012-12-12	126	CD01	39° 31′ 45″ N, 107° 46′ 20″ W	0.2μm	110	36049286	5.41	246	PRJNA288027	SRX1085371
