# Supplementary material for: Analysis of five complete genome sequences for members of the class Peribacteria in the recently recognized Peregrinibacteria bacterial phylum
Source: PeerJ. 2016 Jan 28;4:e1607. doi: 10.7717/peerj.1607 (PMC4736985; doi:10.7717/peerj.1607)
Supplement: Supplemental Information 2 — Kegg Orthology (KO) numbers, and HMM-based predictions below trusted HMM thresholds are in italics and grey font. [file peerj-04-1607-s002.xlsx]

## Sheet: Sheet1
Supplementary Table S2. Overview of the complete genome Candidatus Peribacter Riflensis str.RIFOXYC2_FULL_PER-ii_58_32, including information about gene size, coding strand, gene order and predicted functions. Kegg Orthology (KO) numbers, and HMM-based predictions below trusted HMM thresholds are in italics and grey font.
ORF	Start	End	Strand	Length	KO*	Gene Name	HMM -based funcational prediction	Uniref90 and KEGG-based annotation	Pathway for HMM annotation	KEGG Module	HMM E-value	HMM Hit score	HMM threshold	HMM length
RIFOXYC2_FULL_PER-ii_58_32_1	1	240	-	80	-	-	(not C-rich)	hypothetical protein	-	-	-	-	-	80
RIFOXYC2_FULL_PER-ii_58_32_2	293	898	-	202	K06951	K06951	COG: COG2316	Metal dependent phosphohydrolase	-	-	1.3e-48	161.1	111	202
RIFOXYC2_FULL_PER-ii_58_32_3	948	2549	-	534	K04566	lysK	lysyl-tRNA synthetase, class I [EC:6.1.1.6]	lysyl-tRNA synthetase (EC:6.1.1.6)	Aminoacyl-tRNA biosynthesis	M00360	3.6e-110	365.5	76.4	534
RIFOXYC2_FULL_PER-ii_58_32_4	2636	4078	-	481	K12580	CNOT3, NOT3	CCR4-NOT transcription complex subunit 3	hypothetical protein	RNA degradation	-	0.0024	12.8	73.8	481
RIFOXYC2_FULL_PER-ii_58_32_5	4179	4991	-	271	K14717	SLC39A11, ZIP11	solute carrier family 39 (zinc transporter), member 11	ZIP family zinc transporter; K07238 zinc transporter, ZIP family	-	-	5.5e-102	337.4	137.9	271
RIFOXYC2_FULL_PER-ii_58_32_6	5202	5816	+	205	K02906	RP-L3, MRPL3, rplC	large subunit ribosomal protein L3	rplC; ribosomal protein L3 (BL3); K02906 large subunit ribosomal protein L3	Ribosome	M00178; M00179	2.8e-62	207.6	49.9	205
RIFOXYC2_FULL_PER-ii_58_32_7	5813	6574	+	254	K02926	RP-L4, MRPL4, rplD	large subunit ribosomal protein L4	50S ribosomal protein L4; K02926 large subunit ribosomal protein L4	Ribosome	M00178	3e-58	193.8	18.9	254
RIFOXYC2_FULL_PER-ii_58_32_8	6575	6883	+	103	K02892	RP-L23, MRPL23, rplW	large subunit ribosomal protein L23	hypothetical protein	Ribosome	M00178; M00179	2.3e-22	76.2	15.8	103
RIFOXYC2_FULL_PER-ii_58_32_9	6886	7737	+	284	K02886	RP-L2, MRPL2, rplB	large subunit ribosomal protein L2	50S ribosomal protein L2; K02886 large subunit ribosomal protein L2	Ribosome	M00178; M00179	1.1e-106	353.2	35.4	284
RIFOXYC2_FULL_PER-ii_58_32_10	7785	8129	+	115	K02965	RP-S19, rpsS	small subunit ribosomal protein S19	30S ribosomal protein S19; K02965 small subunit ribosomal protein S19	Ribosome	M00178; M00179	3.1e-40	134.3	23	115
RIFOXYC2_FULL_PER-ii_58_32_11	8133	8630	+	166	K02890	RP-L22, MRPL22, rplV	large subunit ribosomal protein L22	50S ribosomal protein L22; K02890 large subunit ribosomal protein L22	Ribosome	M00178; M00179	5.7e-35	117	26.5	166
RIFOXYC2_FULL_PER-ii_58_32_12	8679	9344	+	222	K02982	RP-S3, rpsC	small subunit ribosomal protein S3	30S ribosomal protein S3; K02982 small subunit ribosomal protein S3	Ribosome	M00178; M00179	1.8e-77	256.3	24	222
RIFOXYC2_FULL_PER-ii_58_32_13	9351	9773	+	141	K02878	RP-L16, MRPL16, rplP	large subunit ribosomal protein L16	rplP; 50S ribosomal protein L16; K02878 large subunit ribosomal protein L16	Ribosome	M00178	2.2e-52	174.1	19.5	141
RIFOXYC2_FULL_PER-ii_58_32_14	9777	10097	+	107	K02904	RP-L29, rpmC	large subunit ribosomal protein L29	hypothetical protein	Ribosome	M00178; M00179	0.0004	16.6	23.6	107
RIFOXYC2_FULL_PER-ii_58_32_15	10094	10459	+	122	K02961	RP-S17, MRPS17, rpsQ	small subunit ribosomal protein S17	30S ribosomal protein S17	Ribosome	M00178; M00179	3.2e-25	85	18.1	122
RIFOXYC2_FULL_PER-ii_58_32_16	10456	10824	+	123	K02874	RP-L14, MRPL14, rplN	large subunit ribosomal protein L14	50S ribosomal protein L14P; K02874 large subunit ribosomal protein L14	Ribosome	M00178; M00179	1.7e-52	175.1	27.8	123
RIFOXYC2_FULL_PER-ii_58_32_17	10821	11363	+	181	K02895	RP-L24, MRPL24, rplX	large subunit ribosomal protein L24	50S ribosomal protein L24; K02895 large subunit ribosomal protein L24	Ribosome	M00178; M00179	2.9e-33	111.6	18.2	181
RIFOXYC2_FULL_PER-ii_58_32_18	11370	11951	+	194	K02931	RP-L5, MRPL5, rplE	large subunit ribosomal protein L5	rplE; 50S ribosomal protein L5; K02931 large subunit ribosomal protein L5	Ribosome	M00178; M00179	6.1e-62	204.7	26.3	194
RIFOXYC2_FULL_PER-ii_58_32_19	11957	12181	+	75	K02954	RP-S14, MRPS14, rpsN	small subunit ribosomal protein S14	Ribosomal protein S14	Ribosome	M00178; M00179	3.6e-21	71.6	16	75
RIFOXYC2_FULL_PER-ii_58_32_20	12185	12574	+	130	K02994	RP-S8, rpsH	small subunit ribosomal protein S8	30S ribosomal protein S8; K02994 small subunit ribosomal protein S8	Ribosome	M00178; M00179	5.4e-39	129.3	39.6	130
RIFOXYC2_FULL_PER-ii_58_32_21	12596	13159	+	188	K02933	RP-L6, MRPL6, rplF	large subunit ribosomal protein L6	rplF; 50S ribosomal protein L6; K02933 large subunit ribosomal protein L6	Ribosome	M00178; M00179	1.3e-72	240.4	38	188
RIFOXYC2_FULL_PER-ii_58_32_22	13169	13513	+	115	K02881	RP-L18, MRPL18, rplR	large subunit ribosomal protein L18	rplR; 50S ribosomal protein L18; K02881 large subunit ribosomal protein L18	Ribosome	M00178; M00179	8.5e-46	151.9	26.1	115
RIFOXYC2_FULL_PER-ii_58_32_23	13547	14164	+	206	K02988	RP-S5, MRPS5, rpsE	small subunit ribosomal protein S5	rpsE; 30S ribosomal subunit protein S5	Ribosome	M00178; M00179	6.3e-59	195.5	84.3	206
RIFOXYC2_FULL_PER-ii_58_32_24	14295	14819	+	175	K05520	pfpI	protease I [EC:3.2.-.-]	ThiJ/PfpI domain-containing protein; K05520 protease I [EC:3.2.-.-]	-	-	1.9e-48	160.9	139.6	175
RIFOXYC2_FULL_PER-ii_58_32_25	14995	16122	-	376	K05988	dexA	dextranase [EC:3.2.1.11]	hypothetical protein	-	-	5.2e-05	17.5	174.7	376
RIFOXYC2_FULL_PER-ii_58_32_26	16264	16704	+	147	K02876	RP-L15, MRPL15, rplO	large subunit ribosomal protein L15	50S ribosomal protein L15; K02876 large subunit ribosomal protein L15	Ribosome	M00178; M00179	1.2e-41	139.4	25.2	147
RIFOXYC2_FULL_PER-ii_58_32_27	16733	18010	+	426	K03076	secY	preprotein translocase subunit SecY	preprotein translocase subunit SecY; K03076 preprotein translocase subunit SecY	Bacterial secretion system Protein export	M00335	5.8e-137	453.1	94.2	426
RIFOXYC2_FULL_PER-ii_58_32_27b					Inserted		Inserted ORF, possibly rpS23	30S ribosomal protein S23
RIFOXYC2_FULL_PER-ii_58_32_28	18538	19098	+	187	K00939	adk, AK	adenylate kinase [EC:2.7.4.3]	adenylate kinase; K00939 adenylate kinase [EC:2.7.4.3]	Purine metabolism	M00049	1.3e-47	158.7	15.2	187
RIFOXYC2_FULL_PER-ii_58_32_29	19231	19983	+	251	K01265	map	methionyl aminopeptidase [EC:3.4.11.18]	methionine aminopeptidase	-	-	1.1e-85	284.4	25.3	251
RIFOXYC2_FULL_PER-ii_58_32_30	20007	20393	+	129	K02518	infA	translation initiation factor IF-1	translation initiation factor 1; K02518 translation initiation factor IF-1	-	-	4.1e-37	123.7	37.7	129
RIFOXYC2_FULL_PER-ii_58_32_31	20415	20546	+	44	K02919	RP-L36, MRPL36, rpmJ	large subunit ribosomal protein L36	hypothetical protein	Ribosome	M00178	5.9e-12	42.5	19.6	44
RIFOXYC2_FULL_PER-ii_58_32_32	20562	20942	+	127	K02952	RP-S13, rpsM	small subunit ribosomal protein S13	30S ribosomal protein S13; K02952 small subunit ribosomal protein S13	Ribosome	M00178; M00179	9.2e-43	142	55.6	127
RIFOXYC2_FULL_PER-ii_58_32_33	20960	21487	+	176	K02948	RP-S11, MRPS11, rpsK	small subunit ribosomal protein S11	rpsK; 30S ribosomal protein S11; K02948 small subunit ribosomal protein S11	Ribosome	M00178; M00179	7.6e-48	159.3	44.7	176
RIFOXYC2_FULL_PER-ii_58_32_34	21518	22135	+	206	K02986	RP-S4, rpsD	small subunit ribosomal protein S4	30S ribosomal protein S4; K02986 small subunit ribosomal protein S4	Ribosome	M00178; M00179	3.3e-63	209.7	33.7	206
RIFOXYC2_FULL_PER-ii_58_32_35	22161	23189	+	343	K03040	rpoA	DNA-directed RNA polymerase subunit alpha [EC:2.7.7.6]	rpoA; DNA-directed RNA polymerase subunit alpha (EC:2.7.7.6)	Purine metabolism Pyrimidine metabolism RNA polymerase	M00183	1.7e-101	336	45.1	343
RIFOXYC2_FULL_PER-ii_58_32_36	23227	23643	+	139	K02879	RP-L17, MRPL17, rplQ	large subunit ribosomal protein L17	50S ribosomal protein L17; K02879 large subunit ribosomal protein L17	Ribosome	M00178	1.7e-27	92.8	19.9	139
RIFOXYC2_FULL_PER-ii_58_32_37	23640	24065	+	142	K02871	RP-L13, MRPL13, rplM	large subunit ribosomal protein L13	rplM; 50S ribosomal protein L13; K02871 large subunit ribosomal protein L13	Ribosome	M00178; M00179	1e-57	191.2	29.7	142
RIFOXYC2_FULL_PER-ii_58_32_38	24069	24479	+	137	K02996	RP-S9, MRPS9, rpsI	small subunit ribosomal protein S9	rpsI; 30S ribosomal protein S9; K02996 small subunit ribosomal protein S9	Ribosome	M00178; M00179	3.2e-48	160.7	17.7	137
RIFOXYC2_FULL_PER-ii_58_32_39	24607	24963	-	119	K13812	fae-hps	bifunctional enzyme Fae/Hps [EC:4.2.1.147 4.1.2.43]	hypothetical protein	Methane metabolism Pentose phosphate pathway	M00345; M00580	0.0093	10.8	232.1	119
							tRNA (Thr)
RIFOXYC2_FULL_PER-ii_58_32_40	25239	26318	+	360	K04096	smf	DNA processing protein	DNA protecting protein DprA; K04096 DNA processing protein	-	-	5.4e-117	387.7	18	360
RIFOXYC2_FULL_PER-ii_58_32_41	26445	27284	+	280	K01126	E3.1.4.46, glpQ, ugpQ	glycerophosphoryl diester phosphodiesterase [EC:3.1.4.46]	hypothetical protein	Glycerophospholipid metabolism	-	0.00019	16.4	130.3	280
RIFOXYC2_FULL_PER-ii_58_32_42	27298	28011	-	238	K01803	TPI, tpiA	triosephosphate isomerase (TIM) [EC:5.3.1.1]	tpiA; triosephosphate isomerase (EC:5.3.1.1)	Carbon fixation in photosynthetic organisms Fructose and mannose metabolism Glycolysis / Gluconeogenesis Inositol phosphate metabolism	M00001; M00002; M00003	1.2e-80	267.8	17.7	238
RIFOXYC2_FULL_PER-ii_58_32_43	28027	28800	-	258	K17286	STOM	erythrocyte band 7 integral membrane protein	HflC; stomatin-like transmembrane protein	-	-	2.2e-71	237.3	126.1	258
RIFOXYC2_FULL_PER-ii_58_32_44	28823	29260	+	146	K01808	rpiB	ribose 5-phosphate isomerase B [EC:5.3.1.6]	sugar-phosphate isomerase, RpiB/LacA/LacB family (EC:5.3.1.6)	Carbon fixation in photosynthetic organisms Fructose and mannose metabolism Pentose phosphate pathway	M00004; M00007; M00165; M00167	2.5e-52	172.7	100.2	146
RIFOXYC2_FULL_PER-ii_58_32_45	29264	30190	+	309	K07088	K07088	COG: COG0679: Possible ORs in alternative fram with weak hit to domain: transcription termination factor Rho	auxin efflux carrier; K07088	-	-	1.2e-80	267.1	35.3	309
RIFOXYC2_FULL_PER-ii_58_32_46	30234	30881	+	216	K01783	rpe, RPE	ribulose-phosphate 3-epimerase [EC:5.1.3.1]	ribulose-phosphate 3-epimerase (EC:5.1.3.1); K01783 ribulose-phosphate 3-epimerase [EC:5.1.3.1]	Carbon fixation in photosynthetic organisms Pentose and glucuronate interconversions Pentose phosphate pathway	M00004; M00007	4e-88	292.2	39.6	216
RIFOXYC2_FULL_PER-ii_58_32_47	30878	31363	+	162	K09005	K09005	hypothetical protein	hypothetical protein; K09005 hypothetical protein	-	-	1.5e-34	115.9	30.4	162
RIFOXYC2_FULL_PER-ii_58_32_48	31367	32629	+	421	K03850	ALG10	alpha-1,2-glucosyltransferase [EC:2.4.1.256]	hypothetical protein; K03850 alpha-1,2-glucosyltransferase [EC:2.4.1.256]	N-Glycan biosynthesis	M00055	1.8e-19	65.7	18.6	421
RIFOXYC2_FULL_PER-ii_58_32_49	32634	32996	-	121	K00901	C-rich	diacylglycerol kinase (ATP) [EC:2.7.1.107] - annotation supported by interpro, but seen notes	diacylglycerol kinase; K00901 diacylglycerol kinase [EC:2.7.1.107]	Glycerolipid metabolism Glycerophospholipid metabolism Phosphatidylinositol signaling system	-	3.9e-32	107.1	18.2	121
RIFOXYC2_FULL_PER-ii_58_32_50	33000	33968	-	323	K01923	purC	phosphoribosylaminoimidazole-succinocarboxamide synthase [EC:6.3.2.6]	phosphoribosylaminoimidazole-succinocarboxamide synthase (EC:6.3.2.6); K01923 phosphoribosylaminoimidazole-succinocarboxamide synthase [EC:6.3.2.6]	Purine metabolism	M00048	2.6e-109	361.8	60.1	323
RIFOXYC2_FULL_PER-ii_58_32_51	34101	34853	-	251	K00721	DPM1	dolichol-phosphate mannosyltransferase [EC:2.4.1.83]	UDP-phosphate 4-deoxy-4-formamido-L-arabinose transferase (EC:2.7.8.-)	N-Glycan biosynthesis	-	7.7e-61	201.8	158.7	251
RIFOXYC2_FULL_PER-ii_58_32_52	34917	35372	+	152	K06931	K06931	COG: COG3849	hypothetical protein	-	-	0.0014	14.3	38.3	152
RIFOXYC2_FULL_PER-ii_58_32_53	35404	36021	-	206	K00680	E2.3.1.-	Possibly maltose O-acetyltransferase 2.3.1.79/2.3.1.18	hexapaptide repeat-containing transferase; K00661 maltose O-acetyltransferase [EC:2.3.1.79]	Aminobenzoate degradation Benzoate degradation Ethylbenzene degradation Limonene and pinene degradation Tyrosine metabolism	-	1e-34	116.2	78.7	206
RIFOXYC2_FULL_PER-ii_58_32_54	36150	37865	+	572	-	-	-	hypothetical protein	-	-	-	-	-	572
RIFOXYC2_FULL_PER-ii_58_32_55	37906	39102	+	399	K13905	CST9	cystatin-9	hypothetical protein	-	-	0.0083	12.1	87.3	399
RIFOXYC2_FULL_PER-ii_58_32_56	39130	40353	-	408	-	-	-	hypothetical protein	-	-	-	-	-	408
RIFOXYC2_FULL_PER-ii_58_32_57	40582	42414	-	611	K02004	ABC.CD.P	putative ABC transport system permease protein	hypothetical protein: interpro: 11 transmembrane domains	-	M00258	2.9e-05	18.9	200.1	611
RIFOXYC2_FULL_PER-ii_58_32_58	42419	44203	-	595	-	-		hypothetical protein	-	-	-	-	-	595
RIFOXYC2_FULL_PER-ii_58_32_59	44259	45332	-	358	K01784	galE, GALE	UDP-glucose 4-epimerase [EC:5.1.3.2]	NAD-dependent epimerase/dehydratase	Amino sugar and nucleotide sugar metabolism Galactose metabolism	M00361; M00362; M00632	9e-58	192.2	115.1	358
RIFOXYC2_FULL_PER-ii_58_32_60	45383	46084	+	234	K00721	DPM1	dolichol-phosphate mannosyltransferase [EC:2.4.1.83]	cell wall biosynthesis glycosyltransferase	N-Glycan biosynthesis	-	2.2e-46	154.6	50.9	234
RIFOXYC2_FULL_PER-ii_58_32_61	46088	47596	-	503	K00728	POMT	dolichyl-phosphate-mannose-protein mannosyltransferase [EC:2.4.1.109]	gt39A; glycosyl transferase family protein (EC:2.4.1.109)	Other types of O-glycan biosynthesis	-	4.9e-45	149.6	41.4	503
RIFOXYC2_FULL_PER-ii_58_32_62	47750	49663	+	638	K03798	ftsH, hflB	cell division protease FtsH [EC:3.4.24.-]	ATP-dependent metalloprotease FtsH (EC:3.6.4.3); K03798 cell division protease FtsH [EC:3.4.24.-]	-	-	2.7e-243	805.8	22.3	638
RIFOXYC2_FULL_PER-ii_58_32_63	49732	51045	+	438	K01756	purB, ADSL	adenylosuccinate lyase [EC:4.3.2.2]	purB; adenylosuccinate lyase; K01756 adenylosuccinate lyase [EC:4.3.2.2]	Alanine, aspartate and glutamate metabolism Purine metabolism	M00048; M00049	6.1e-191	632.4	96.5	438
RIFOXYC2_FULL_PER-ii_58_32_64	51157	51336	+	60	-	-		hypothetical protein	-	-	-	-	-	60
RIFOXYC2_FULL_PER-ii_58_32_65	51669	53024	+	452	K13993	HSP20	HSP20 family protein: Glimmer: 51,669 -> 53,024	hypothetical protein	Protein processing in endoplasmic reticulum	-	0.0019	14	33.5	452
							tRNA (Leu)
RIFOXYC2_FULL_PER-ii_58_32_66	53822	55183	-	454	-	-	Glimmer: 55,216 -> 53,822	hypothetical protein	-	-	-	-	-	454
RIFOXYC2_FULL_PER-ii_58_32_67	55213	58038	-	942	K05199	GRIA3	glutamate receptor 3	hypothetical protein	Neuroactive ligand-receptor interaction cAMP signaling pathway	-	0.0018	12.2	109	942
RIFOXYC2_FULL_PER-ii_58_32_68	58035	60470	-	812	K00754	E2.4.1.-	-	polysaccharide pyruvyl transferase CsaB	Fructose and mannose metabolism	-	3.4e-12	42.2	197.1	812
RIFOXYC2_FULL_PER-ii_58_32_69	60636	64433	-	1266	K09879	crtU	isorenieratene synthase	FAD dependent oxidoreductase	Carotenoid biosynthesis	-	1.5e-07	26	107.9	1266
RIFOXYC2_FULL_PER-ii_58_32_70	64489	66282	-	598	-	-	-	hypothetical protein	-	-	-	-	-	598
RIFOXYC2_FULL_PER-ii_58_32_71	66394	68937	-	848	K03832	tonB	periplasmic protein TonB	hypothetical protein	-	-	0.00066	15.9	20.7	848
RIFOXYC2_FULL_PER-ii_58_32_72	68987	71134	-	716	K01972	E6.5.1.2, ligA, ligB	DNA ligase (NAD+) [EC:6.5.1.2]	ligA; NAD-dependent DNA ligase LigA (EC:6.5.1.2); K01972 DNA ligase (NAD+) [EC:6.5.1.2]	Base excision repair DNA replication Mismatch repair Nucleotide excision repair	-	3.8e-250	828.3	41.5	716
RIFOXYC2_FULL_PER-ii_58_32_73	71377	71613	+	79	K04516	AROA1, aroA	chorismate mutase [EC:5.4.99.5]	hypothetical protein	Phenylalanine, tyrosine and tryptophan biosynthesis	M00024; M00025	0.0023	14.1	50.3	79
RIFOXYC2_FULL_PER-ii_58_32_74	71688	72446	+	253	K00721	DPM1	dolichol-phosphate mannosyltransferase [EC:2.4.1.83]	putative dolichol-phosphate mannosyltransferase-putative membrane bound sugar transferase involved in LPS biosynthesis	N-Glycan biosynthesis	-	1.4e-41	138.5	158.7	253
RIFOXYC2_FULL_PER-ii_58_32_75	72443	73267	+	275	K00978	rfbF	glucose-1-phosphate cytidylyltransferase [EC:2.7.7.33]	glucose-1-phosphate cytidylyltransferase (EC:2.7.7.33)	Amino sugar and nucleotide sugar metabolism Starch and sucrose metabolism	-	2.4e-107	354.2	117.5	275
RIFOXYC2_FULL_PER-ii_58_32_76	73254	74255	+	334	K01709	rfbG	CDP-glucose 4,6-dehydratase [EC:4.2.1.45]	rfbG; CDP-glucose 4,6-dehydratase; K01709 CDP-glucose 4,6-dehydratase [EC:4.2.1.45]	Amino sugar and nucleotide sugar metabolism	-	5.6e-156	514.5	222.2	334
RIFOXYC2_FULL_PER-ii_58_32_77	74260	75279	+	340	K02669	pilT	twitching motility protein PilT	twitching motility protein; K02669 twitching motility protein PilT	-	-	4.4e-142	470.8	69.2	340
RIFOXYC2_FULL_PER-ii_58_32_78	75557	75958	-	134	-	-	-	hypothetical protein	-	-	-	-	-	134
RIFOXYC2_FULL_PER-ii_58_32_79	76064	76252	-	63	-	-	-	hypothetical protein	-	-	-	-	-	63
RIFOXYC2_FULL_PER-ii_58_32_80	76519	78780	+	754	K02462	gspM	general secretion pathway protein M	multi-sensor signal transduction histidine kinase (EC:2.7.13.3)	Bacterial secretion system	M00331	0.00017	17.8	31.6	754
RIFOXYC2_FULL_PER-ii_58_32_81	78849	79817	-	323	K00809	DHPS, dys	deoxyhypusine synthase [EC:2.5.1.46]	deoxyhypusine synthase-like protein; K00809 deoxyhypusine synthase [EC:2.5.1.46]	-	-	1.3e-144	477.3	54.4	323
								weak hits to genes annotation:with 4.1.1.50 S-adenosylmethionine decarboxylase	Arginine and proline metabolism Cysteine and methionine metabolism
RIFOXYC2_FULL_PER-ii_58_32_82	80300	80869	+	190	K02456	gspG	general secretion pathway protein G	hypothetical protein	Bacterial secretion system	M00331	0.00023	16.6	41.3	190
RIFOXYC2_FULL_PER-ii_58_32_83	81254	82330	+	359	K00936	E2.7.3.-	ORF may be much longer, domains in predicted portion: adaptive-response sensory kinase	multi-sensor signal transduction histidine kinase (EC:2.7.13.3)	-	-	1.4e-61	204.8	15.1	359
RIFOXYC2_FULL_PER-ii_58_32_84	82374	82499	+	42	-	-	-	hypothetical protein	-	-	-	-	-	42
RIFOXYC2_FULL_PER-ii_58_32_85	82529	83536	-	336	K01990	ABC-2.A	ABC-2 type transport system ATP-binding protein	ABC transporter	-	M00254	1.5e-77	257.5	14.9	336
RIFOXYC2_FULL_PER-ii_58_32_86	83550	84305	-	252	K01992	ABC-2.P	ABC-2 type transport system permease protein	hypothetical protein	-	M00254	1.5e-15	53.3	21.5	252
RIFOXYC2_FULL_PER-ii_58_32_87	84311	85099	-	263	K01992	ABC-2.P	ABC-2 type transport system permease protein	hypothetical protein; K01992 ABC-2 type transport system permease protein	-	M00254	8.3e-34	113.7	92.8	263
RIFOXYC2_FULL_PER-ii_58_32_88	85290	85721	+	144	K01611	speD, AMD1	S-adenosylmethionine decarboxylase [EC:4.1.1.50]	speH; S-adenosylmethionine decarboxylase SpeH (EC:4.1.1.50)	Arginine and proline metabolism Cysteine and methionine metabolism	M00034; M00133	6.3e-11	38.5	16.9	144
RIFOXYC2_FULL_PER-ii_58_32_89	85751	86320	-	190	K00951	relA	GTP pyrophosphokinase [EC:2.7.6.5] - start may be missed	RelA/SpoT protein; K00951 GTP pyrophosphokinase [EC:2.7.6.5]	Purine metabolism	-	1e-34	116	62.7	190
RIFOXYC2_FULL_PER-ii_58_32_90	86722	87390	-	223	-	-		hypothetical protein	-	-	-	-	-	223
RIFOXYC2_FULL_PER-ii_58_32_91	87409	87957	-	183	K02279	cpaB, rcpC	pilus assembly protein CpaB	hypothetical protein	-	-	0.00019	17.1	19.9	183
RIFOXYC2_FULL_PER-ii_58_32_92	88063	88695	-	211	K07090	K07090	COG: COG0730	hypothetical protein	-	-	0.001	14.4	22.9	211
RIFOXYC2_FULL_PER-ii_58_32_93	88692	89345	-	218	K06999	K06999	phospholipase/carboxylesterase (no domains in NCBI)	hypothetical protein	-	-	0.0013	13.9	56.1	218
RIFOXYC2_FULL_PER-ii_58_32_94	89372	90010	-	213	-	-	-	hypothetical protein	-	-	-	-	-	213
RIFOXYC2_FULL_PER-ii_58_32_95	90134	90808	-	225	-	-	-	hypothetical protein	-	-	-	-	-	225
RIFOXYC2_FULL_PER-ii_58_32_96	90810	96122	-	1771	K14074	PNLIPRP1, PLRP1	pancreatic lipase-related protein 1 [EC:3.1.1.3]	Hemolysin-type calcium-binding repeat family protein	Glycerolipid metabolism	M00098	5.3e-12	41.6	267.1	1771
RIFOXYC2_FULL_PER-ii_58_32_97	96390	96800	-	137	K04568	poxA	lysyl-tRNA synthetase, class II [EC:6.1.1.6]	DNA methylase	Aminoacyl-tRNA biosynthesis	M00360	3.3e-13	45.5	167.4	137
RIFOXYC2_FULL_PER-ii_58_32_98	96929	97330	+	134	K00567	ogt, MGMT	methylated-DNA-[protein]-cysteine S-methyltransferase [EC:2.1.1.63]	ogt_2; methylated-DNA--[protein]-cysteine S-methyltransferase (EC:2.1.1.63); K00567 methylated-DNA-[protein]-cysteine S-methyltransferase [EC:2.1.1.63]	This protein is involved in the repair of alkylated DNA	-	4.6e-50	167.1	18.7	134
RIFOXYC2_FULL_PER-ii_58_32_99	97304	97537	-	78	-	-	-	hypothetical protein	-	-	-	-	-	78
RIFOXYC2_FULL_PER-ii_58_32_100	97602	99707	-	702	K01342	aprE	subtilisin [EC:3.4.21.62]	peptidase S8/S53 subtilisin kexin sedolisin; K01362 [EC:3.4.21.-]	-	-	3.5e-86	286.3	201.2	702
RIFOXYC2_FULL_PER-ii_58_32_101	99804	101258	+	485	K00764	purF, PPAT	amidophosphoribosyltransferase [EC:2.4.2.14]	glutamine phosphoribosylpyrophosphate amidotransferase	Alanine, aspartate and glutamate metabolism Purine metabolism	M00048	2.6e-112	372	45.2	485
RIFOXYC2_FULL_PER-ii_58_32_102	101259	101756	-	166	K02456	gspG	general secretion pathway protein G	hypothetical protein	Bacterial secretion system	M00331	1.5e-08	30.3	29.2	166
RIFOXYC2_FULL_PER-ii_58_32_103	101860	102042	+	61	K06148	ABCC-BAC	ATP-binding cassette, subfamily C, bacterial	hypothetical protein	ABC transporters	-	0.0022	12.5	105.1	61
RIFOXYC2_FULL_PER-ii_58_32_104	102055	102852	-	266	K00533	E1.12.7.2L	ferredoxin hydrogenase large subunit Iron Hydrogenase: large subunit, C-terminal	NtrC family signal transduction histidine kinase	-	-	1.7e-23	79.2	404	266
RIFOXYC2_FULL_PER-ii_58_32_105	102845	103372	-	176	-	-	-	Uncharacterized protein	-	-	-	-	-	176
RIFOXYC2_FULL_PER-ii_58_32_106	103531	104211	-	227	K11068	hlyIII	hemolysin III	hemolysin III family channel protein; K11068 hemolysin III	-	-	2.3e-77	256.7	47.5	227
RIFOXYC2_FULL_PER-ii_58_32_107	104208	105245	-	346	K07301	yrbG	cation:H+ antiporter	calcium/cation antiporter; K07301 inner membrane protein	-	-	3e-48	160.5	21.9	346
RIFOXYC2_FULL_PER-ii_58_32_108	105331	106596	-	422	K11927	rhlE	ATP-dependent RNA helicase RhlE [EC:3.6.4.13]	DEAD/DEAH box helicase; K11927 ATP-dependent RNA helicase RhlE [EC:3.6.4.13]	RNA degradation	-	1.3e-165	548.7	85.7	422
RIFOXYC2_FULL_PER-ii_58_32_109	107250	111944	-	1565	-	-		hypothetical protein	-	-	-	-	-	1565
RIFOXYC2_FULL_PER-ii_58_32_110	112062	112445	-	128	-	-	-	hypothetical protein	-	-	-	-	-	128
RIFOXYC2_FULL_PER-ii_58_32_111	112529	112849	-	107	-	-	-	hypothetical protein	-	-	-	-	-	107
RIFOXYC2_FULL_PER-ii_58_32_112	113132	114769	-	546	-	-	-	hypothetical protein	-	-	-	-	-	546
RIFOXYC2_FULL_PER-ii_58_32_113	114775	116268	-	498	K17677	IRC3	ATP-dependent helicase IRC3 [EC:3.6.4.-]	hypothetical protein	-	-	2.4e-38	128.1	47.2	498
							tRNA (Asn)
RIFOXYC2_FULL_PER-ii_58_32_114	116702	117970	-	423	K07446	trm-G10	tRNA (guanine10-N2)-dimethyltransferase [EC:2.1.1.213]	hypothetical protein	-	-	1.6e-18	63	133.8	423
RIFOXYC2_FULL_PER-ii_58_32_115	118057	119505	-	483	-	-		hypothetical protein	-	-	-	-	-	483
RIFOXYC2_FULL_PER-ii_58_32_116	119502	120770	-	423	-	-	-	hypothetical protein	-	-	-	-	-	423
RIFOXYC2_FULL_PER-ii_58_32_117	120807	122657	-	617	K01872	AARS, alaS	alanyl-tRNA synthetase [EC:6.1.1.7]	alanyl-tRNA synthetase; K01872 alanyl-tRNA synthetase [EC:6.1.1.7]	Aminoacyl-tRNA biosynthesis	M00359; M00360	1.3e-224	744.8	36.5	617
RIFOXYC2_FULL_PER-ii_58_32_118	122794	124236	+	481	K07636	phoR	two-component system, OmpR family, phosphate regulon sensor histidine kinase PhoR [EC:2.7.13.3]	multi-sensor signal transduction histidine kinase (EC:2.7.3.-); K07636 two-component system, OmpR family, phosphate regulon sensor histidine kinase PhoR [EC:2.7.13.3]	Two-component system	M00434	4.4e-51	170.4	44.9	481
RIFOXYC2_FULL_PER-ii_58_32_119	124217	124954	-	246	K01421	yhgE	putative membrane protein	hypothetical protein	-	-	2.8e-05	18.5	213.2	246
RIFOXYC2_FULL_PER-ii_58_32_120	125037	126566	-	510	K01595	ppc	phosphoenolpyruvate carboxylase [EC:4.1.1.31]	phosphoenolpyruvate carboxylase; K01595 phosphoenolpyruvate carboxylase [EC:4.1.1.31]	Carbon fixation in photosynthetic organisms Carbon fixation pathways in prokaryotes Methane metabolism Pyruvate metabolism	M00168; M00170; M00171; M00172; M00173; M00346; M00374	1.8e-144	478.1	21.5	510
RIFOXYC2_FULL_PER-ii_58_32_121	126615	127772	+	386	K00832	tyrB	aromatic-amino-acid transaminase [EC:2.6.1.57]	aspC; aromatic amino acid aminotransferase (EC:2.6.1.57); K00813 aspartate aminotransferase [EC:2.6.1.1]	Cysteine and methionine metabolism Isoquinoline alkaloid biosynthesis Novobiocin biosynthesis Phenylalanine metabolism Phenylalanine, tyrosine and tryptophan biosynthesis Tropane, piperidine and pyridine alkaloid biosynthesis Tyrosine metabolism	M00024; M00025; M00034; M00040	2.1e-75	250.3	111.3	386
RIFOXYC2_FULL_PER-ii_58_32_122	127969	128277	+	103	-	-	Possible alternative ORF? 128,364 -> 127,822	hypothetical protein	-	-	-	-	-	103
RIFOXYC2_FULL_PER-ii_58_32_123	128384	128599	+	72	K00415	QCR2, UQCRC2	ubiquinol-cytochrome c reductase core subunit 2	hypothetical protein : no domain	Oxidative phosphorylation	M00152	0.0013	13.6	273.5	72
RIFOXYC2_FULL_PER-ii_58_32_124	128621	129784	+	388	K00936	E2.7.3.-	-	hypothetical protein	-	-	5.5e-18	60.8	15.1	388
RIFOXYC2_FULL_PER-ii_58_32_125	129792	130898	-	369	K17830	GGR	digeranylgeranylglycerophospholipid reductase [EC:1.3.1.101 1.3.99.34]	fumarate reductase/succinate dehydrogenase flavoprotein domain-containing protein; K10960 geranylgeranyl reductase [EC:1.3.1.83]	Glycerophospholipid metabolism	-	3e-33	111.1	201.3	369
RIFOXYC2_FULL_PER-ii_58_32_126	130904	132328	+	475	K06937	K06937	COG: COG1964	radical SAM protein; K06937	-	-	4.4e-148	490.7	72.9	475
RIFOXYC2_FULL_PER-ii_58_32_127	132325	132960	+	212	K16168	bpsB, srsB	methyltransferase	isoprenylcysteine carboxyl methyltransferase	-	-	4.6e-12	42	44.8	212
RIFOXYC2_FULL_PER-ii_58_32_128	132957	133421	+	155	K07035	K07035	COG: COG3641	transmembrane_regions 25..42	-	-	0.0012	13.8	18.1	155
RIFOXYC2_FULL_PER-ii_58_32_129	133414	134196	+	261	K13292	lgt, umpA	phosphatidylglycerol:prolipoprotein diacylglycerol transferase [EC:2.-.-.-]	prolipoprotein diacylglyceryl transferase	-	-	6e-46	153	24	261
RIFOXYC2_FULL_PER-ii_58_32_130	134177	134683	+	169	K07552	bcr	MFS transporter, DHA1 family, bicyclomycin/chloramphenicol resistance protein	hypothetical protein	-	-	4.6e-05	18.4	226.3	169
RIFOXYC2_FULL_PER-ii_58_32_131	135407	136030	-	208	K01400	nprE	bacillolysin [EC:3.4.24.28];	putative S-layer protein	-	-	1.8e-09	31.5	420	208
RIFOXYC2_FULL_PER-ii_58_32_132	136106	137260	-	385	K01400	nprE	bacillolysin [EC:3.4.24.28]	N-acetylmuramoyl-L-alanine amidase (EC:3.5.1.28)	-	-	3.8e-12	40.3	420	385
RIFOXYC2_FULL_PER-ii_58_32_133	137330	137524	+	65	-	-	-	hypothetical protein	-	-	-	-	-	65
RIFOXYC2_FULL_PER-ii_58_32_134	137527	137919	-	131	K08972	K08972	putative membrane protein	hypothetical protein; K08972 putative membrane protein	-	-	2e-12	43.3	23.1	131
RIFOXYC2_FULL_PER-ii_58_32_135	137930	142339	-	1470	K01870	IARS, ileS	isoleucyl-tRNA synthetase [EC:6.1.1.5]	Isoleucyl-tRNA synthetase (EC:6.1.1.5); K01870 isoleucyl-tRNA synthetase [EC:6.1.1.5]	Aminoacyl-tRNA biosynthesis	M00359; M00360	0	1317	79.4	1470
RIFOXYC2_FULL_PER-ii_58_32_136	142462	142749	+	96	K02005	ABC.CD.TX	HlyD family secretion protein	hypothetical protein	-	-	0.00011	17.4	169.6	96
RIFOXYC2_FULL_PER-ii_58_32_137	142808	144742	+	645	K00951	relA	GTP pyrophosphokinase [EC:2.7.6.5]	GTP pyrophosphokinase; K00951 GTP pyrophosphokinase [EC:2.7.6.5]	Purine metabolism	-	1.7e-125	416.3	62.7	645
RIFOXYC2_FULL_PER-ii_58_32_138	144775	145944	+	390	K04052	yscH, sctH	type III secretion protein H	hypothetical protein	-	-	0.0021	14.3	19.8	390
RIFOXYC2_FULL_PER-ii_58_32_139	146080	146634	-	185	K03671	trxA	thioredoxin 1	thioredoxin-like protein	-	-	6.2e-06	22	124.2	185
RIFOXYC2_FULL_PER-ii_58_32_140	146707	147228	+	174	K03574	mutT, NUDT15, MTH2	8-oxo-dGTP diphosphatase [EC:3.6.1.55]	(di)nucleoside polyphosphate hydrolase (EC:3.6.1.-)	-	-	1.2e-16	56.6	14.6	174
RIFOXYC2_FULL_PER-ii_58_32_141	147179	150106	-	976	K03701	uvrA	excinuclease ABC subunit A	excinuclease ABC subunit A; K03701 excinuclease ABC subunit A	Nucleotide excision repair	-	0	1513.6	99.1	976
RIFOXYC2_FULL_PER-ii_58_32_142	150286	150855	+	190	K00793	ribE, RIB5	riboflavin synthase [EC:2.5.1.9]	ribE; riboflavin synthase (EC:2.5.1.9)	Riboflavin metabolism	M00125	2.3e-73	243	19.5	190
RIFOXYC2_FULL_PER-ii_58_32_143	150857	151342	+	162	K00794	ribH, RIB4	6,7-dimethyl-8-ribityllumazine synthase [EC:2.5.1.78]	ribH; 6,7-dimethyl-8-ribityllumazine synthase; K00794 6,7-dimethyl-8-ribityllumazine synthase [EC:2.5.1.78]	Riboflavin metabolism	M00125	8.6e-39	129.2	32.4	162
RIFOXYC2_FULL_PER-ii_58_32_144	151442	152803	+	454	K19049	cslA	chondroitin AC lyase [EC:4.2.2.5]	cell wall hydrolase/autolysin; K01448 N-acetylmuramoyl-L-alanine amidase [EC:3.5.1.28]	-	-	4.5e-20	66.7	299.3	454
RIFOXYC2_FULL_PER-ii_58_32_145	152868	153371	-	168	K19055	prdX, proX	Ala-tRNA(Pro) deacylase [EC:3.1.1.-]	hypothetical protein	-	-	1.8e-62	206.7	99.7	168
RIFOXYC2_FULL_PER-ii_58_32_146	153404	154687	+	428	K14652	ribBA	3,4-dihydroxy 2-butanone 4-phosphate synthase / GTP cyclohydrolase II [EC:4.1.99.12 3.5.4.25]	GTP cyclohydrolase II; K14652 3,4-dihydroxy 2-butanone 4-phosphate synthase / GTP cyclohydrolase II [EC:4.1.99.12 3.5.4.25]	Riboflavin metabolism	M00125	9.1e-205	677.6	42.7	428
RIFOXYC2_FULL_PER-ii_58_32_147	154928	155521	-	198	-	-	-	hypothetical protein	-	-	-	-	-	198
							tRNA (Arg)
RIFOXYC2_FULL_PER-ii_58_32_148	155708	156118	+	137	-	-		hypothetical protein	-	-	-	-	-	137
RIFOXYC2_FULL_PER-ii_58_32_149	156397	158712	+	772	K01400	nprE	bacillolysin [EC:3.4.24.28]	putative lipoprotein	-	-	2.1e-07	24.6	420	772
RIFOXYC2_FULL_PER-ii_58_32_150	158721	160517	-	599	K06207	typA, bipA	GTP-binding protein	typA; GTP-binding protein TypA; K06207 GTP-binding protein	-	-	3.6e-278	920.5	112.8	599
RIFOXYC2_FULL_PER-ii_58_32_151	160708	160902	-	65	K03704	cspA	cold shock protein (beta-ribbon, CspA family)	hypothetical protein	-	-	5.8e-18	61.3	19.7	65
RIFOXYC2_FULL_PER-ii_58_32_152	161092	162471	+	460	K03932	lpqC	polyhydroxybutyrate depolymerase	hypothetical protein : contains 2 S-layer domains and hydrolase/esterase domain	-	-	1.3e-34	116	100.3	460
RIFOXYC2_FULL_PER-ii_58_32_153	162643	162780	+	46	-	-	-	hypothetical protein	-	-	-	-	-	46
RIFOXYC2_FULL_PER-ii_58_32_154	163487	164014	-	176	K07110	K07110	COG: COG3800	hypothetical protein	-	-	2.8e-10	35.1	50.2	176
RIFOXYC2_FULL_PER-ii_58_32_155	164195	165859	-	555	-	-		hypothetical protein	-	-	-	-	-	555
RIFOXYC2_FULL_PER-ii_58_32_156	165943	167346	-	468	-	-	DUF4173 in longer protein	hypothetical protein	-	-	-	-	-	468
							tRNA (Gln)
RIFOXYC2_FULL_PER-ii_58_32_157	167731	168057	-	109	-	-		seg 9..22	-	-	-	-	-	109
RIFOXYC2_FULL_PER-ii_58_32_158	168276	168797	-	174	K05520	pfpI	protease I [EC:3.2.-.-]	hypothetical protein	-	-	0.0029	13.2	129	174
RIFOXYC2_FULL_PER-ii_58_32_159	168810	169442	-	211	K08259	lytM	lysostaphin [EC:3.4.24.75]	Uncharacterized protein	-	-	9.3e-08	28.1	141.5	211
RIFOXYC2_FULL_PER-ii_58_32_160	169447	170466	-	340	K06889	K06889	COG: COG1073	peptidase S9 prolyl oligopeptidase active site domain-containing protein	-	-	7.7e-34	113.3	26.8	340
RIFOXYC2_FULL_PER-ii_58_32_161	170604	172580	+	659	K19049	cslA	chondroitin AC lyase [EC:4.2.2.5]	amidase	-	-	3.3e-17	57.2	299.3	659
RIFOXYC2_FULL_PER-ii_58_32_162	172644	173246	-	201	K06188	aqpZ	aquaporin Z	major intrinsic protein	-	-	7.3e-37	123.3	39	201
RIFOXYC2_FULL_PER-ii_58_32_163	173394	173861	-	156	K06204	dksA	DnaK suppressor protein	TraR/DksA family transcriptional regulator; K06204 DnaK suppressor protein	-	-	5.9e-22	74.9	26.9	156
RIFOXYC2_FULL_PER-ii_58_32_164	174009	175391	+	461	K06213	mgtE	magnesium transporter	magnesium transporter; K06213 magnesium transporter	-	-	1.3e-115	383	87.9	461
RIFOXYC2_FULL_PER-ii_58_32_165	175554	175859	+	102	K02407	fliD	flagellar hook-associated protein 2	hypothetical protein	Flagellar assembly	-	0.00012	17.2	34.5	102
RIFOXYC2_FULL_PER-ii_58_32_166	175856	177031	-	392	K08151	tetA	MFS transporter, DHA1 family, tetracycline resistance protein	major facilitator superfamily transporter	-	M00668	1.8e-15	52.5	97.9	392
RIFOXYC2_FULL_PER-ii_58_32_167	177166	178530	+	455	K02133	ATPeF1B, ATP5B, ATP2	F-type H+-transporting ATPase subunit beta [EC:3.6.3.14]	F0F1 ATP synthase subunit beta (EC:3.6.3.14); K02112 F-type H+-transporting ATPase subunit beta [EC:3.6.3.14]	Oxidative phosphorylation	M00158	1e-280	931.2	156.3	455
RIFOXYC2_FULL_PER-ii_58_32_168	178565	178972	+	136	K07133	K07133	COG: COG1373	30S ribosomal protein S23	-	-	0.0021	13.4	21.9	136
RIFOXYC2_FULL_PER-ii_58_32_169	178989	179429	+	147	K02114	ATPF1E, atpC	F-type H+-transporting ATPase subunit epsilon	ATP synthase F1 subunit epsilon; K02114 F-type H+-transporting ATPase subunit epsilon [EC:3.6.3.14]	Oxidative phosphorylation Photosynthesis	M00157	4.5e-36	120.2	48.3	147
RIFOXYC2_FULL_PER-ii_58_32_170	179419	179664	+	82	K02116	atpI	ATP synthase protein I	seg	-	-	3.5e-08	29.4	22.8	82
RIFOXYC2_FULL_PER-ii_58_32_171	179795	180607	+	271	K02108	ATPF0A, atpB	F-type H+-transporting ATPase subunit a	ATP synthase F0 subunit A; K02108 F-type H+-transporting ATPase subunit a [EC:3.6.3.14]	Oxidative phosphorylation Photosynthesis	M00157	2.4e-65	217	74.5	271
RIFOXYC2_FULL_PER-ii_58_32_172	180681	181046	+	122	K13750	SLC24A2, NCKX2	solute carrier family 24 (sodium/potassium/calcium exchanger), member 2	hypothetical protein	-	-	1.3e-05	19.7	137.3	122
RIFOXYC2_FULL_PER-ii_58_32_173	181208	181465	+	86	K02110	ATPF0C, atpE	F-type H+-transporting ATPase subunit c	atpE; ATP synthase subunit c; K02110 F-type H+-transporting ATPase subunit c [EC:3.6.3.14]	Oxidative phosphorylation Photosynthesis	M00157	2.5e-24	82.2	44.4	86
RIFOXYC2_FULL_PER-ii_58_32_174	181555	182061	+	169	K02109	ATPF0B, atpF	F-type H+-transporting ATPase subunit b	F0F1 ATP synthase subunit B; K02109 F-type H+-transporting ATPase subunit b [EC:3.6.3.14]	Oxidative phosphorylation Photosynthesis	M00157	7e-30	100.3	73.9	169
RIFOXYC2_FULL_PER-ii_58_32_175	182058	182471	+	138	K02113	ATPF1D, atpH	F-type H+-transporting ATPase subunit delta	hypothetical protein	Oxidative phosphorylation Photosynthesis	M00157	1.8e-16	56.5	23.3	138
RIFOXYC2_FULL_PER-ii_58_32_176	182524	184053	+	510	K02132	ATPeF1A, ATP5A1, ATP1	F-type H+-transporting ATPase subunit alpha	atpA; ATP synthase F0F1 subunit alpha (EC:3.6.3.14); K02111 F-type H+-transporting ATPase subunit alpha [EC:3.6.3.14]	Oxidative phosphorylation	M00158	5.1e-254	841.7	97.4	510
RIFOXYC2_FULL_PER-ii_58_32_177	184164	185090	+	309	K02115	ATPF1G, atpG	F-type H+-transporting ATPase subunit gamma	atpG; ATP synthase F0F1 subunit gamma (EC:3.6.3.14); K02115 F-type H+-transporting ATPase subunit gamma [EC:3.6.3.14]	Oxidative phosphorylation Photosynthesis	M00157	2.1e-92	305.9	61.7	309
RIFOXYC2_FULL_PER-ii_58_32_178	185125	186111	-	329	K08676	tri	tricorn protease [EC:3.4.21.-]	hypothetical protein	-	-	0.00019	15	135.2	329
RIFOXYC2_FULL_PER-ii_58_32_179	186274	189891	-	1206	K17686	copA, ATP7	Cu+-exporting ATPase [EC:3.6.3.54]	copper-translocating P-type ATPase; K01533 Cu2+-exporting ATPase [EC:3.6.3.4]	-	-	0	1141.2	40.6	1206
RIFOXYC2_FULL_PER-ii_58_32_180	190009	190281	-	91	K07807	K07807	hypothetical protein NreA	hypothetical protein	-	-	2e-14	49.7	18.4	91
RIFOXYC2_FULL_PER-ii_58_32_181	190313	190633	+	107	-	-	-	hypothetical protein	-	-	-	-	-	107
RIFOXYC2_FULL_PER-ii_58_32_182	190642	192045	-	468	K09792	K09792	hypothetical protein	heavy metal transport/detoxification protein	-	-	2.3e-38	128.3	70.7	468
RIFOXYC2_FULL_PER-ii_58_32_183	192104	192493	-	130	-	-	-	hypothetical protein	-	-	-	-	-	130
RIFOXYC2_FULL_PER-ii_58_32_184	192743	193249	-	169	-	-	-	hypothetical protein	-	-	-	-	-	169
RIFOXYC2_FULL_PER-ii_58_32_185	193373	193645	-	91	K00960	E2.7.7.6	DNA-directed RNA polymerase [EC:2.7.7.6]	hypothetical protein	-	-	1.8e-06	24.1	23.1	91
RIFOXYC2_FULL_PER-ii_58_32_186	193837	194901	+	355	K07636	phoR	two-component system, OmpR family, phosphate regulon sensor histidine kinase PhoR [EC:2.7.13.3]	NarL family signal transduction histidine kinase	Two-component system	M00434	2.8e-41	138	44.9	355
RIFOXYC2_FULL_PER-ii_58_32_187	194888	195874	-	329	K00058	serA, PHGDH	D-3-phosphoglycerate dehydrogenase [EC:1.1.1.95]	phosphoglycerate dehydrogenase	Glycine, serine and threonine metabolism Methane metabolism	M00020	2.8e-95	315.1	68.7	329
RIFOXYC2_FULL_PER-ii_58_32_188	195910	196659	-	250	K06975	K06975	COG: COG2388	hypothetical protein	-	-	0.0078	12.4	84.2	250
RIFOXYC2_FULL_PER-ii_58_32_189	196672	196959	-	96	K13292	lgt, umpA	phosphatidylglycerol:prolipoprotein diacylglycerol transferase [EC:2.-.-.-]	hypothetical protein	-	-	2.5e-06	22.7	18.3	96
RIFOXYC2_FULL_PER-ii_58_32_190	196985	198634	-	550	K01649	leuA	2-isopropylmalate synthase [EC:2.3.3.13]	leuA; 2-isopropylmalate synthase (EC:2.3.3.13); K01649 2-isopropylmalate synthase [EC:2.3.3.13]	Pyruvate metabolism Valine, leucine and isoleucine biosynthesis	M00432	1.8e-108	359.5	72.5	550
RIFOXYC2_FULL_PER-ii_58_32_191	198823	199740	-	306	-	-	-	hypothetical protein	-	-	-	-	-	306
RIFOXYC2_FULL_PER-ii_58_32_192	199784	199927	-	48	-	-	-	hypothetical protein	-	-	-	-	-	48
RIFOXYC2_FULL_PER-ii_58_32_193	199935	201005	-	357	K01933	purM	phosphoribosylformylglycinamidine cyclo-ligase [EC:6.3.3.1]	purM; phosphoribosylformylglycinamidine cyclo-ligase (EC:6.3.3.1); K01933 phosphoribosylformylglycinamidine cyclo-ligase [EC:6.3.3.1]	Purine metabolism	M00048	1.6e-87	289.9	52	357
RIFOXYC2_FULL_PER-ii_58_32_194	201056	201499	+	148	-	-	-	hypothetical protein	-	-	-	-	-	148
RIFOXYC2_FULL_PER-ii_58_32_195	201474	202259	-	262	K09812	ftsE	cell division transport system ATP-binding protein	ftsE; cell division ATP-binding protein FtsE; K09812 cell division transport system ATP-binding protein	ABC transporters	M00256	2.5e-91	303.2	67.7	262
RIFOXYC2_FULL_PER-ii_58_32_196	202298	202462	-	55	-	-	-	hypothetical protein	-	-	-	-	-	55
RIFOXYC2_FULL_PER-ii_58_32_197	202481	203074	-	198	K02427	rlmE, rrmJ, ftsJ	23S rRNA (uridine2552-2'-O)-methyltransferase [EC:2.1.1.166]	ftsJ; cell division protein	-	-	9.6e-70	231.9	54.4	198
RIFOXYC2_FULL_PER-ii_58_32_198	203133	203324	+	64	-	-	-	hypothetical protein	-	-	-	-	-	64
RIFOXYC2_FULL_PER-ii_58_32_199	203332	204072	-	247	K03501	gidB, rsmG	16S rRNA (guanine527-N7)-methyltransferase [EC:2.1.1.170]	gidB; 16S rRNA methyltransferase GidB (EC:2.1.-.-); K03501 16S rRNA (guanine527-N7)-methyltransferase [EC:2.1.1.170]	-	-	8.5e-52	172.3	44.4	247
RIFOXYC2_FULL_PER-ii_58_32_200	204131	204763	+	211	K00762	pyrE	orotate phosphoribosyltransferase [EC:2.4.2.10]	orotate phosphoribosyltransferase; K00762 orotate phosphoribosyltransferase [EC:2.4.2.10]	Pyrimidine metabolism	M00051	2.8e-57	190.1	25.8	211
RIFOXYC2_FULL_PER-ii_58_32_201	204803	205060	+	86	K02896	RP-L24e, RPL24	large subunit ribosomal protein L24e	hypothetical protein	Ribosome	M00177; M00179	0.0031	12.8	17.8	86
RIFOXYC2_FULL_PER-ii_58_32_202	205152	205862	+	237	K09125	K09125	hypothetical protein	hypothetical protein; K09125 hypothetical protein	-	-	3.2e-77	255.8	22.8	237
RIFOXYC2_FULL_PER-ii_58_32_203	205893	206168	+	92	-	-	-	hypothetical protein	-	-	-	-	-	92
RIFOXYC2_FULL_PER-ii_58_32_204	206211	206312	+	34	-	-	-	hypothetical protein	-	-	-	-	-	34
RIFOXYC2_FULL_PER-ii_58_32_205	206427	208970	+	848	-	-	-	hypothetical protein	-	-	-	-	-	848
RIFOXYC2_FULL_PER-ii_58_32_206	209076	210095	-	340	K01889	FARSA, pheS	phenylalanyl-tRNA synthetase alpha chain [EC:6.1.1.20]	pheS; phenylalanyl-tRNA synthetase subunit alpha; K01889 phenylalanyl-tRNA synthetase alpha chain [EC:6.1.1.20]	Aminoacyl-tRNA biosynthesis	M00359; M00360	2.4e-88	293.3	29.8	340
RIFOXYC2_FULL_PER-ii_58_32_207	210218	210580	-	121	-	-	-	hypothetical protein	-	-	-	-	-	121
RIFOXYC2_FULL_PER-ii_58_32_208	210604	211242	-	213	K02334	dpo	DNA polymerase bacteriophage-type [EC:2.7.7.7]	phage SPO1 DNA polymerase-related protein; K02334 DNA polymerase bacteriophage-type [EC:2.7.7.7]	-	-	1.3e-72	240.7	22.4	213
RIFOXYC2_FULL_PER-ii_58_32_209	211266	211760	-	165	-	-	-	hypothetical protein	-	-	-	-	-	165
RIFOXYC2_FULL_PER-ii_58_32_210	211776	212225	-	150	K01587	PAICS	phosphoribosylaminoimidazole carboxylase / phosphoribosylaminoimidazole-succinocarboxamide synthase [EC:4.1.1.21 6.3.2.6]	phosphoribosylaminoimidazole carboxylase catalytic subunit (EC:4.1.1.21); K01588 5-(carboxyamino)imidazole ribonucleotide mutase [EC:5.4.99.18]	Purine metabolism	M00048	5.6e-35	116.7	183	150
							tRNA (Arg)
							tRNA (Ala)
RIFOXYC2_FULL_PER-ii_58_32_211	212861	213532	+	224	K07579	K07579	putative methylase (start overlaps tRNA?)	hypothetical protein	-	-	0.00078	15	65.3	224
RIFOXYC2_FULL_PER-ii_58_32_212	213571	213951	+	127	-	-	-	hypothetical protein	-	-	-	-	-	127
RIFOXYC2_FULL_PER-ii_58_32_213	214456	215055	+	200	K00942	E2.7.4.8, gmk	guanylate kinase [EC:2.7.4.8]	guanylate kinase (EC:2.7.4.8)	Purine metabolism	M00050	2.1e-47	157.7	60	200
RIFOXYC2_FULL_PER-ii_58_32_214	215116	216108	+	331	K01424	E3.5.1.1, ansA, ansB	L-asparaginase [EC:3.5.1.1]	asparaginase 1	Alanine, aspartate and glutamate metabolism Cyanoamino acid metabolism	-	5.7e-98	324.5	26.3	331
RIFOXYC2_FULL_PER-ii_58_32_215	216211	216375	-	55	K16926	htsT	energy-coupling factor transport system substrate-specific component	hypothetical protein	-	M00582	0.001	15	45.4	55
RIFOXYC2_FULL_PER-ii_58_32_216	216428	216739	-	104	-	-	-	hypothetical protein	-	-	-	-	-	104
RIFOXYC2_FULL_PER-ii_58_32_217	216787	218175	-	463	K15778	pmm-pgm	phosphomannomutase / phosphoglucomutase [EC:5.4.2.8 5.4.2.2]	phosphomannomutase (EC:5.4.2.8); K15778 phosphomannomutase / phosphoglucomutase [EC:5.4.2.8 5.4.2.2]	Amino sugar and nucleotide sugar metabolism Fructose and mannose metabolism Galactose metabolism Glycolysis / Gluconeogenesis Pentose phosphate pathway Purine metabolism Starch and sucrose metabolism Streptomycin biosynthesis	M00114	1e-159	529.8	187.8	463
RIFOXYC2_FULL_PER-ii_58_32_218	218276	219970	+	565	K00688	E2.4.1.1, glgP, PYG	starch phosphorylase [EC:2.4.1.1]	alpha-glucan phosphorylase	Starch and sucrose metabolism	M00565	1e-183	609.1	27.2	565
RIFOXYC2_FULL_PER-ii_58_32_219	219975	220781	-	269	K03197	virB2, lvhB2	type IV secretion system protein VirB2	transmembrane_regions 7..26	Bacterial secretion system	M00333	0.0016	14.7	19.2	269
RIFOXYC2_FULL_PER-ii_58_32_220	220778	221584	-	269	-	-	-	hypothetical protein	-	-	-	-	-	269
RIFOXYC2_FULL_PER-ii_58_32_221	221700	222389	+	230	K06890	K06890	COG: COG0670	hypothetical protein; K06890	-	-	2.4e-35	118.1	22.6	230
RIFOXYC2_FULL_PER-ii_58_32_222	222548	222733	+	62	-	-	-	hypothetical protein	-	-	-	-	-	62
RIFOXYC2_FULL_PER-ii_58_32_223	222795	223181	+	129	K03625	nusB	N utilization substance protein B	nusB; transcription termination protein NusB; K03625 N utilization substance protein B	-	-	1.8e-38	128.4	20.1	129
RIFOXYC2_FULL_PER-ii_58_32_224	223270	223959	+	230	K03685	rnc, DROSHA, RNT1	ribonuclease III [EC:3.1.26.3]	putative ribonuclease III (EC:3.1.26.3)	Ribosome biogenesis in eukaryotes	-	1e-73	245.1	16.6	230
RIFOXYC2_FULL_PER-ii_58_32_225	224089	224580	-	164	K02946	RP-S10, MRPS10, rpsJ	small subunit ribosomal protein S10	30S ribosomal protein S10; K02946 small subunit ribosomal protein S10	Ribosome	M00178; M00179	6.4e-37	123	17.9	164
RIFOXYC2_FULL_PER-ii_58_32_226	224652	225833	-	394	K02358	tuf, TUFM	elongation factor Tu	tuf; translation elongation factor Tu; K02358 elongation factor Tu	-	-	9.7e-231	762.7	27.4	394
RIFOXYC2_FULL_PER-ii_58_32_227	226014	226982	+	323	K03575	mutY	A/G-specific adenine glycosylase [EC:3.2.2.-]	Catalytic Domain Of MutyY; K03575 A/G-specific adenine glycosylase [EC:3.2.2.-]	Base excision repair	-	2.2e-78	260.5	18.4	323
RIFOXYC2_FULL_PER-ii_58_32_228	226983	230075	-	1031	K08647	PAPPA2	pappalysin-2 [EC:3.4.24.-]: lipoprotein	putative lipoprotein	-	-	2.1e-17	57.9	301.5	1031
RIFOXYC2_FULL_PER-ii_58_32_229	230098	236808	-	2237	K10475	KBTBD8	kelch repeat and BTB domain-containing protein 8	putative lipoprotein	-	-	1.8e-08	29.2	375.2	2237
RIFOXYC2_FULL_PER-ii_58_32_230	236970	238526	-	519	K18682	rny	ribonucrease Y [EC:3.1.-.-]	metal dependent phosphohydrolase	RNA degradation	-	2e-177	586.7	26.5	519
							Glimmer :238,911 -> 239,030
RIFOXYC2_FULL_PER-ii_58_32_231	239175	241442	+	756	K09607	ina	immune inhibitor A [EC:3.4.24.-];	nucleic acid binding, OB-fold, tRNA/helicase-type	-	-	4e-07	24.5	80.2	756
RIFOXYC2_FULL_PER-ii_58_32_232	241504	241812	+	103	K04050	yscE, sctE	type III secretion protein E	hypothetical protein	-	-	0.0024	14.3	19.6	103
RIFOXYC2_FULL_PER-ii_58_32_233	241809	242015	+	69	K06218	relE, stbE	mRNA interferase RelE/StbE	Addiction module antitoxin	-	-	7.7e-17	57.9	27.2	69
RIFOXYC2_FULL_PER-ii_58_32_234	242099	247729	+	1877	-	-	Glimmer: 242,099 -> 247,729	hypothetical protein	-	-	-	-	-	1877
RIFOXYC2_FULL_PER-ii_58_32_235	248760	250331	+	524	K05627	BAIAP2, IRSP53	BAI1-associated protein 2; Glimmer: 247,767 -> 250,331 - two very weak domain hits at end	hypothetical protein	Adherens junction Regulation of actin cytoskeleton	-	1.6e-05	19.9	55.8	524
RIFOXYC2_FULL_PER-ii_58_32_236	250343	251302	+	320	-	-	-	hypothetical protein	-	-	-	-	-	320
RIFOXYC2_FULL_PER-ii_58_32_237	251310	251615	+	102	-	-	-	hypothetical protein	-	-	-	-	-	102
RIFOXYC2_FULL_PER-ii_58_32_238	251772	252899	+	376	K01956	carA, CPA1	carbamoyl-phosphate synthase small subunit [EC:6.3.5.5]	carA; Carbamoylphosphate synthase small subunit; K01956 carbamoyl-phosphate synthase small subunit [EC:6.3.5.5]	Alanine, aspartate and glutamate metabolism Pyrimidine metabolism	M00051	1.4e-158	525.6	79.5	376
RIFOXYC2_FULL_PER-ii_58_32_239	252896	253096	+	67	-	-	-	hypothetical protein	-	-	-	-	-	67
RIFOXYC2_FULL_PER-ii_58_32_240	253236	253793	+	186	K11175	purN	phosphoribosylglycinamide formyltransferase 1 [EC:2.1.2.2]	purN; phosphoribosylglycinamide formyltransferase; K11175 phosphoribosylglycinamide formyltransferase 1 [EC:2.1.2.2]	One carbon pool by folate Purine metabolism	M00048	2.5e-55	184.4	52.9	186
RIFOXYC2_FULL_PER-ii_58_32_241	253865	254608	+	248	K00523	ascD, ddhD, rfbI	CDP-4-dehydro-6-deoxyglucose reductase [EC:1.17.1.1]	putative FMN reductase (EC:1.5.1.29); K00523 CDP-4-dehydro-6-deoxyglucose reductase [EC:1.17.1.1]	Amino sugar and nucleotide sugar metabolism	-	1.4e-56	188.3	69.8	248
RIFOXYC2_FULL_PER-ii_58_32_242	254774	255634	-	287	K12234	cofE, fbiB	coenzyme F420-0:L-glutamate ligase / coenzyme F420-1:gamma-L-glutamate ligase [EC:6.3.2.31 6.3.2.34]	F420-0:gamma-glutamyl ligase	Methane metabolism	M00378	4.3e-57	190.3	45.1	287
RIFOXYC2_FULL_PER-ii_58_32_243	255639	257318	+	560	K03832	tonB	periplasmic protein TonB	hypothetical protein	-	-	0.00046	16.4	46.3	560
RIFOXYC2_FULL_PER-ii_58_32_244	257325	258047	-	241	-	-	-	hypothetical protein	-	-	-	-	-	241
RIFOXYC2_FULL_PER-ii_58_32_245	258071	258499	+	143	K03059	rpoP	DNA-directed RNA polymerase subunit P [EC:2.7.7.6]	hypothetical protein	Purine metabolism Pyrimidine metabolism RNA polymerase	M00184	0.00052	15.6	43.3	143
RIFOXYC2_FULL_PER-ii_58_32_246	258504	258842	+	113	K09807	K09807	hypothetical protein	hypothetical protein	-	-	1.4e-05	20.8	82.6	113
RIFOXYC2_FULL_PER-ii_58_32_247	258941	259261	+	107	K06391	spoIIIAB	stage III sporulation protein AB	hypothetical protein	-	-	0.00071	15.5	20.5	107
RIFOXYC2_FULL_PER-ii_58_32_248	259258	262683	+	1142	K03546	sbcC	exonuclease SbcC	hypothetical protein	-	-	1e-09	33.1	68.5	1142
RIFOXYC2_FULL_PER-ii_58_32_249	262960	266904	+	1315	K03046	rpoC	DNA-directed RNA polymerase subunit beta' [EC:2.7.7.6]	rpoC; DNA-directed RNA polymerase subunit beta' (EC:2.7.7.6); K03046 DNA-directed RNA polymerase subunit beta' [EC:2.7.7.6]	Purine metabolism Pyrimidine metabolism RNA polymerase	M00183	0	1619	66.6	1315
RIFOXYC2_FULL_PER-ii_58_32_250	266971	267393	+	141	K02950	RP-S12, MRPS12, rpsL	small subunit ribosomal protein S12	rpsL; 30S ribosomal protein S12; K02950 small subunit ribosomal protein S12	Ribosome	M00178; M00179	4.2e-71	235.3	32.1	141
RIFOXYC2_FULL_PER-ii_58_32_251	267486	267938	+	151	K02992	RP-S7, MRPS7, rpsG	small subunit ribosomal protein S7	30S ribosomal protein S7; K02992 small subunit ribosomal protein S7	Ribosome	M00178; M00179	4e-53	176.6	51.5	151
RIFOXYC2_FULL_PER-ii_58_32_252	267957	268511	-	185	K03497	parB, spo0J	chromosome partitioning protein, ParB family	hypothetical protein	-	-	0.0011	14.1	19.3	185
RIFOXYC2_FULL_PER-ii_58_32_253	268690	270792	+	701	K02355	fusA, GFM, EFG	elongation factor G	translation elongation factor 2 (EF-2/EF-G)	-	-	0	1058.8	114	701
RIFOXYC2_FULL_PER-ii_58_32_254	270995	271318	+	108	K08178	JEN	MFS transporter, SHS family, lactate transporter	hypothetical protein	-	-	0.0022	12.2	103.3	108
RIFOXYC2_FULL_PER-ii_58_32_255	271441	271821	+	127	K03720	trpR	TrpR family transcriptional regulator, trp operon repressor	TrpR-related protein YerC/YecD	-	-	1.6e-10	36.9	32	127
RIFOXYC2_FULL_PER-ii_58_32_256	271966	273039	+	358	K06871	K06871	uncharacterized protein	radical SAM domain-containing protein	-	-	3.1e-22	75.2	27.2	358
RIFOXYC2_FULL_PER-ii_58_32_257	273087	273620	+	178	K07025	K07025	putative hydrolase of the HAD superfamily	hypothetical protein	-	-	0.0055	12.1	151.7	178
RIFOXYC2_FULL_PER-ii_58_32_258	273659	274633	+	325	K11752	ribD	diaminohydroxyphosphoribosylaminopyrimidine deaminase / 5-amino-6-(5-phosphoribosylamino)uracil reductase [EC:3.5.4.26 1.1.1.193]	riboflavin biosynthesis protein RibD (EC:1.1.1.193 3.5.4.26); K11752 diaminohydroxyphosphoribosylaminopyrimidine deaminase / 5-amino-6-(5-phosphoribosylamino)uracil reductase [EC:3.5.4.26 1.1.1.193]	Riboflavin metabolism	M00125	5.4e-95	314.8	54.7	325
RIFOXYC2_FULL_PER-ii_58_32_259	274652	275542	-	297	K00299	ssuE	FMN reductase [EC:1.5.1.38]	hypothetical protein	Riboflavin metabolism Sulfur metabolism	-	1.5e-11	40.5	21.8	297
RIFOXYC2_FULL_PER-ii_58_32_260	275613	279014	+	1134	K00525	E1.17.4.1A, nrdA, nrdE	ribonucleoside-diphosphate reductase alpha chain [EC:1.17.4.1]	ribonucleoside-diphosphate reductase (EC:1.17.4.1); K00525 ribonucleoside-diphosphate reductase alpha chain [EC:1.17.4.1]	Purine metabolism Pyrimidine metabolism	M00053	0	1436.3	158.9	1134
RIFOXYC2_FULL_PER-ii_58_32_261	279060	279503	+	148	K03555	mutS	DNA mismatch repair protein MutS	hypothetical protein	Mismatch repair	-	0.0015	12.9	61.6	148
RIFOXYC2_FULL_PER-ii_58_32_262	279663	279965	-	101	K03059	rpoP	DNA-directed RNA polymerase subunit P [EC:2.7.7.6]	hypothetical protein	Purine metabolism Pyrimidine metabolism RNA polymerase	M00184	0.0011	14.6	43.3	101
RIFOXYC2_FULL_PER-ii_58_32_263	279965	281059	-	365	K06942	K06942	COG: COG0012	ychF; GTP-dependent nucleic acid-binding protein EngD; K06942	-	-	8.5e-139	459.7	25.3	365
RIFOXYC2_FULL_PER-ii_58_32_264	281191	282396	+	402	K07284	srtA	sortase A [EC:3.4.22.70]	S-layer domain-containing protein	-	-	6.7e-20	67.3	20.5	402
RIFOXYC2_FULL_PER-ii_58_32_265	282401	282748	+	116	-	-	-	hypothetical protein	-	-	-	-	-	116
RIFOXYC2_FULL_PER-ii_58_32_266	282932	283306	-	125	-	-	-	hypothetical protein	-	-	-	-	-	125
RIFOXYC2_FULL_PER-ii_58_32_267	283349	283723	-	125	K03879	ND2	NADH-ubiquinone oxidoreductase chain 2 [EC:1.6.5.3]	hypothetical protein	Oxidative phosphorylation	M00142	0.0017	13.5	90.5	125
RIFOXYC2_FULL_PER-ii_58_32_268	283866	286340	-	825	K06915	K06915	COG: COG0433	hypothetical protein	-	-	1.1e-23	79.9	67.6	825
RIFOXYC2_FULL_PER-ii_58_32_269	286458	286844	-	129	K07669	mprA	two-component system, OmpR family, response regulator MprA	two component transcriptional regulator, winged helix family; K07667 two-component system, OmpR family, KDP operon response regulator KdpE	Two-component system	M00460	1.2e-27	92.8	128.4	129
RIFOXYC2_FULL_PER-ii_58_32_270	287014	287790	-	259	K02357	tsf, TSFM	elongation factor Ts	tsf; elongation factor Ts; K02357 elongation factor Ts	-	-	2.6e-77	256.7	29.4	259
RIFOXYC2_FULL_PER-ii_58_32_271	287830	288567	-	246	K02967	RP-S2, MRPS2, rpsB	small subunit ribosomal protein S2	30S ribosomal protein S2; K02967 small subunit ribosomal protein S2	Ribosome	M00178; M00179	1.5e-81	270.2	93.4	246
RIFOXYC2_FULL_PER-ii_58_32_272	288849	289409	+	187	K03611	dsbB	disulfide bond formation protein DsbB	disulfide bond formation protein DsbB; K03611 disulfide bond formation protein DsbB	-	-	4e-37	124.1	54.9	187
RIFOXYC2_FULL_PER-ii_58_32_273	289435	290013	-	193	-	-	-	hypothetical protein	-	-	-	-	-	193
RIFOXYC2_FULL_PER-ii_58_32_274	290035	291435	-	467	K01880	GARS, glyS1	glycyl-tRNA synthetase [EC:6.1.1.14]	glycyl-tRNA synthetase (EC:6.1.1.14); K01880 glycyl-tRNA synthetase [EC:6.1.1.14]	Aminoacyl-tRNA biosynthesis	M00359; M00360	4.2e-186	617.3	71	467
RIFOXYC2_FULL_PER-ii_58_32_275	291548	293218	+	557	-	-	-	Uncharacterized protein	-	-	-	-	-	557
RIFOXYC2_FULL_PER-ii_58_32_276	293327	294973	+	549	K03797	E3.4.21.102, prc, ctpA	carboxyl-terminal processing protease [EC:3.4.21.102]	carboxy-terminal processing protease (EC:3.4.21.102); K03797 carboxyl-terminal processing protease [EC:3.4.21.102]	-	-	3.5e-110	365.2	43.9	549
RIFOXYC2_FULL_PER-ii_58_32_277	295023	295340	-	72	K02970	RP-S21, MRPS21, rpsU	small subunit ribosomal protein S21	seg 26..39	Ribosome	M00178	4.7e-05	22.1	20.3	72
RIFOXYC2_FULL_PER-ii_58_32_278	295440	297482	+	681	K02470	gyrB	DNA gyrase subunit B [EC:5.99.1.3]	DNA gyrase subunit B (EC:5.99.1.3); K02470 DNA gyrase subunit B [EC:5.99.1.3]	-	-	5.8e-305	1009	69.4	681
RIFOXYC2_FULL_PER-ii_58_32_279	297574	298926	-	451	K01892	HARS, hisS	histidyl-tRNA synthetase [EC:6.1.1.21]	histidyl-tRNA synthetase; K01892 histidyl-tRNA synthetase [EC:6.1.1.21]	Aminoacyl-tRNA biosynthesis	M00359; M00360	2.2e-144	478.1	76.9	451
RIFOXYC2_FULL_PER-ii_58_32_280	299058	299273	-	72	-	-	-	hypothetical protein	-	-	-	-	-	72
RIFOXYC2_FULL_PER-ii_58_32_281	299574	300326	+	251	-	-		id=2786957	-	-	-	-	-	251
RIFOXYC2_FULL_PER-ii_58_32_282	300385	300756	-	124	K03413	cheY	two-component system, chemotaxis family, response regulator CheY	two component, sigma54 specific, transcriptional regulator, Fis family; K07714 two-component system, NtrC family, response regulator AtoC	Bacterial chemotaxis Two-component system	M00506	1.6e-24	82.8	34.1	124
RIFOXYC2_FULL_PER-ii_58_32_283	300815	301177	-	121	K03407	cheA	two-component system, chemotaxis family, sensor kinase CheA [EC:2.7.13.3]	OmpR family two-component response regulator	Bacterial chemotaxis Two-component system	M00506	5.2e-24	80.5	193.6	121
RIFOXYC2_FULL_PER-ii_58_32_284	301184	302530	-	449	K07636	phoR	two-component system, OmpR family, phosphate regulon sensor histidine kinase PhoR [EC:2.7.13.3]	PAS/PAC sensor hybrid histidine kinase	Two-component system	M00434	4.9e-79	262.6	44.9	449
RIFOXYC2_FULL_PER-ii_58_32_285	302620	303000	-	127	K03969	pspA	phage shock protein A	hypothetical protein	-	-	0.00036	16.3	84.8	127
RIFOXYC2_FULL_PER-ii_58_32_286	302997	303278	-	94	-	-	-	hypothetical protein	-	-	-	-	-	94
RIFOXYC2_FULL_PER-ii_58_32_287	303320	303562	-	81	K00797	speE, SRM	spermidine synthase [EC:2.5.1.16]	transglycosylase-associated protein	Arginine and proline metabolism Cysteine and methionine metabolism Glutathione metabolism beta-Alanine metabolism	M00034; M00133	0.00083	13.7	201.2	81
RIFOXYC2_FULL_PER-ii_58_32_288	303592	304251	-	220	K05988	dexA	dextranase [EC:3.2.1.11]	hypothetical protein	-	-	2.7e-09	31.7	174.7	220
RIFOXYC2_FULL_PER-ii_58_32_289	304343	304906	-	188	K06378	spoIIAA	stage II sporulation protein AA (anti-sigma F factor antagonist)	hypothetical protein	-	-	0.0063	12.8	61.8	188
RIFOXYC2_FULL_PER-ii_58_32_290	305665	307548	-	628	K05988	dexA	dextranase [EC:3.2.1.11]	CHRD domain-containing protein	-	-	3.8e-10	34.5	174.7	628
RIFOXYC2_FULL_PER-ii_58_32_291	307701	307925	-	75	K02664	pilO	type IV pilus assembly protein PilO	hypothetical protein	-	-	0.0089	11.8	29.9	75
RIFOXYC2_FULL_PER-ii_58_32_292	307976	309418	-	481	-	-	-	hypothetical protein	-	-	-	-	-	481
RIFOXYC2_FULL_PER-ii_58_32_293	309635	310510	-	292	K07488	K07488	transposase	hypothetical protein	-	-	2.3e-15	52.8	22.5	292
RIFOXYC2_FULL_PER-ii_58_32_294	310719	311432	-	238	K16291	erfK	L,D-transpeptidase ErfK/SrfK	ErfK/YbiS/YcfS/YnhG family protein	-	-	3e-07	25.8	148.6	238
RIFOXYC2_FULL_PER-ii_58_32_295	311640	311804	-	55	K06846	LY6	lymphocyte antigen 6 complex	hypothetical protein	-	-	0.00071	15.3	15.7	55
RIFOXYC2_FULL_PER-ii_58_32_296	311883	314282	+	800	K00036	G6PD, zwf	glucose-6-phosphate 1-dehydrogenase [EC:1.1.1.49]	glucose-6-phosphate 1-dehydrogenase (EC:1.1.1.49); K00036 glucose-6-phosphate 1-dehydrogenase [EC:1.1.1.49]	Glutathione metabolism Pentose phosphate pathway	M00004; M00006; M00008	4.8e-136	451	15.5	800
RIFOXYC2_FULL_PER-ii_58_32_297	314320	314943	-	208	K07052	K07052	COG: COG1266	hypothetical protein	-	-	5.1e-06	22.2	26.1	208
							tRNA (His)
RIFOXYC2_FULL_PER-ii_58_32_298	315580	317664	-	695	K02415	fliL	flagellar FliL protein;	hypothetical protein	-	-	3.9e-06	23.1	35	695
RIFOXYC2_FULL_PER-ii_58_32_299	317667	318011	-	115	K07052	K07052	COG: COG1266	hypothetical protein cdiviTM7_00627	-	-	3.2e-05	19.3	92.4	115
RIFOXYC2_FULL_PER-ii_58_32_300	318017	318400	-	128	K07052	K07052	COG: COG1266	hypothetical protein cdivTM_30108	-	-	0.00036	15.9	92.4	128
RIFOXYC2_FULL_PER-ii_58_32_301	318432	319472	+	347	K01271	pepQ	Xaa-Pro dipeptidase [EC:3.4.13.9]	proline dipeptidase	-	-	6.2e-80	265.4	186.2	347
RIFOXYC2_FULL_PER-ii_58_32_302	319591	320991	+	467	K03797	E3.4.21.102, prc, ctpA	carboxyl-terminal processing protease [EC:3.4.21.102]	transmembrane_regions	-	-	4.4e-11	38	226.2	467
RIFOXYC2_FULL_PER-ii_58_32_303	321102	322145	+	348	K03642	rlpA	rare lipoprotein A	rare lipoprotein a; K03642 rare lipoprotein A	-	-	1e-45	152.7	29.2	348
RIFOXYC2_FULL_PER-ii_58_32_304	322268	324874	+	869	K06915	K06915	COG: COG0433	hypothetical protein	-	-	4.8e-22	74.4	67.6	869
RIFOXYC2_FULL_PER-ii_58_32_305	324878	325288	-	137	-	-	-	hypothetical protein	-	-	-	-	-	137
RIFOXYC2_FULL_PER-ii_58_32_306	325370	326449	-	360	K06975	K06975	COG: COG2388	hypothetical protein	-	-	0.00079	15.2	55.9	360
RIFOXYC2_FULL_PER-ii_58_32_307	326595	327512	+	306	K15011	regB, regS, actS	two-component system, sensor histidine kinase RegB [EC:2.7.13.3]	hypothetical protein	Two-component system	M00523	0.0022	12.6	71.7	306
RIFOXYC2_FULL_PER-ii_58_32_308	327565	327873	+	103	K09747	K09747	hypothetical protein	Uncharacterised protein family UPF0133	-	-	6.2e-14	48	53.7	103
RIFOXYC2_FULL_PER-ii_58_32_309	328021	329019	+	333	K07082	K07082	UPF0755 protein	aminodeoxychorismate lyase; K07082 UPF0755 protein	Folate	-	1.5e-94	313.8	23	333
RIFOXYC2_FULL_PER-ii_58_32_310	329129	329773	+	215	K06966	K06966	COG: COG1611	hypothetical protein	-	-	1.4e-19	66.9	24.2	215
RIFOXYC2_FULL_PER-ii_58_32_311	329950	331341	-	464	K03977	engA	GTP-binding protein	GTP-binding protein engA; K03977 GTP-binding protein	-	-	1.3e-146	485.6	58.7	464
RIFOXYC2_FULL_PER-ii_58_32_312	331363	339252	-	2630	-	-	-	hypothetical protein	-	-	-	-	-	2630
RIFOXYC2_FULL_PER-ii_58_32_313	339389	341851	+	821	K01869	LARS, leuS	leucyl-tRNA synthetase [EC:6.1.1.4]	leuS; leucyl-tRNA synthetase; K01869 leucyl-tRNA synthetase [EC:6.1.1.4]	Aminoacyl-tRNA biosynthesis	M00359; M00360	0	1125.7	76.1	821
RIFOXYC2_FULL_PER-ii_58_32_314	341951	342907	-	319	K02456	gspG	general secretion pathway protein G	hypothetical protein	Bacterial secretion system	M00331	0.0039	14.1	68.8	319
RIFOXYC2_FULL_PER-ii_58_32_315	343000	343575	+	192	K19304	mepM	murein DD-endopeptidase [EC:3.4.24.-]	peptidase M23B	-	-	8.8e-07	24.2	130.4	192
RIFOXYC2_FULL_PER-ii_58_32_316	343572	344033	-	154	-	-	-	hypothetical protein	-	-	-	-	-	154
RIFOXYC2_FULL_PER-ii_58_32_317	344075	345634	+	520	K11392	rsmF	16S rRNA (cytosine1407-C5)-methyltransferase [EC:2.1.1.178]	yebU; rRNA (cytosine-C(5)-)-methyltransferase RsmF; K11392 16S rRNA (cytosine1407-C5)-methyltransferase [EC:2.1.1.178]	-	-	1.7e-100	332.8	204.6	520
RIFOXYC2_FULL_PER-ii_58_32_318	345642	347009	-	456	K03455	TC.KEF	monovalent cation:H+ antiporter-2, CPA2 family	sodium/hydrogen exchanger	-	-	3.8e-51	170.4	36.6	456
RIFOXYC2_FULL_PER-ii_58_32_319	347116	348855	+	580	K02316	dnaG	DNA primase [EC:2.7.7.-]	DNA primase (EC:2.7.7.-)	DNA replication	-	5.9e-150	497.6	16.9	580
RIFOXYC2_FULL_PER-ii_58_32_320	349027	350496	+	490	K03086	SIG1, rpoD	RNA polymerase primary sigma factor	sigma-70 family RNA polymerase sigma factor	-	-	1.2e-146	485.8	32.1	490
RIFOXYC2_FULL_PER-ii_58_32_321	350660	351292	+	211	K03329	yahN	amino acid exporter	lysine exporter protein LysE/YggA	-	-	5.3e-33	110.2	89.6	211
RIFOXYC2_FULL_PER-ii_58_32_322	351357	351569	+	71	-	-	-	hypothetical protein	-	-	-	-	-	71
RIFOXYC2_FULL_PER-ii_58_32_323	351601	354570	+	990	K03657	uvrD, pcrA	DNA helicase II / ATP-dependent DNA helicase PcrA [EC:3.6.4.12]	UvrD/REP helicase; K03657 DNA helicase II / ATP-dependent DNA helicase PcrA [EC:3.6.4.12]	Mismatch repair Nucleotide excision repair	-	5.5e-144	477.8	29.2	990
RIFOXYC2_FULL_PER-ii_58_32_324	354557	355021	-	155	K03040	rpoA	DNA-directed RNA polymerase subunit alpha [EC:2.7.7.6]	hypothetical protein	Purine metabolism Pyrimidine metabolism RNA polymerase	M00183	5.1e-15	51.3	45.1	155
RIFOXYC2_FULL_PER-ii_58_32_325	355188	356240	+	351	-	-	-	hypothetical protein	-	-	-	-	-	351
RIFOXYC2_FULL_PER-ii_58_32_326	356251	356952	-	234	K02428	rdgB	XTP/dITP diphosphohydrolase [EC:3.6.1.66]	deoxyribonucleotide triphosphate pyrophosphatase; K02428 dITP/XTP pyrophosphatase [EC:3.6.1.19]	Purine metabolism	-	3.9e-57	190.2	51.9	234
RIFOXYC2_FULL_PER-ii_58_32_327	356976	357179	+	68	-	-	-	hypothetical protein	-	-	-	-	-	68
RIFOXYC2_FULL_PER-ii_58_32_328	357263	357427	-	55	-	-	-	hypothetical protein	-	-	-	-	-	55
RIFOXYC2_FULL_PER-ii_58_32_329	357557	359830	-	758	K03466	ftsK, spoIIIE	DNA segregation ATPase FtsK/SpoIIIE, S-DNA-T family	DNA translocase FtsK; K03466 DNA segregation ATPase FtsK/SpoIIIE, S-DNA-T family	-	-	4e-212	703	17	758
RIFOXYC2_FULL_PER-ii_58_32_330	359901	360815	+	305	K12451	UER1	3,5-epimerase/4-reductase [EC:5.1.3.- 1.1.1.-]: rhamnose biosynthesis ->	hypothetical protein; K15285 solute carrier family 35, member E3	Amino sugar and nucleotide sugar metabolism Polyketide sugar unit biosynthesis	-	7.9e-68	224.8	53.1	305
RIFOXYC2_FULL_PER-ii_58_32_331	360820	361104	+	95	-	-	-	hypothetical protein	-	-	-	-	-	95
RIFOXYC2_FULL_PER-ii_58_32_332	361323	362510	+	396	-	-	-	hypothetical protein	-	-	-	-	-	396
RIFOXYC2_FULL_PER-ii_58_32_333	362645	363181	+	179	-	-	-	hypothetical protein	-	-	-	-	-	179
RIFOXYC2_FULL_PER-ii_58_32_334	363125	363388	-	88	-	-	-	hypothetical protein	-	-	-	-	-	88
RIFOXYC2_FULL_PER-ii_58_32_335	363522	364619	-	366	K01493	comEB	dCMP deaminase [EC:3.5.4.12]	CMP/dCMP deaminase zinc-binding protein; K01493 dCMP deaminase [EC:3.5.4.12]	Pyrimidine metabolism	M00429	2.8e-57	190.9	47.3	366
RIFOXYC2_FULL_PER-ii_58_32_336	364657	367041	-	795	K05367	pbpC	penicillin-binding protein 1C [EC:2.4.1.-]	1A family penicillin-binding protein (EC:2.4.1.129)	Peptidoglycan biosynthesis	-	3e-206	683.1	52.9	795
RIFOXYC2_FULL_PER-ii_58_32_337	367041	372977	-	1979	K06894	K06894	COG: COG2373	hypothetical protein; K06894	-	-	0	1236.8	401.6	1979
RIFOXYC2_FULL_PER-ii_58_32_338	373264	373731	+	156	-	-	-	hypothetical protein	-	-	-	-	-	156
RIFOXYC2_FULL_PER-ii_58_32_339	373791	375659	-	623	K09667	OGT	protein O-GlcNAc transferase [EC:2.4.1.255]	hypothetical protein	Other types of O-glycan biosynthesis	-	6.4e-37	122.4	269.8	623
RIFOXYC2_FULL_PER-ii_58_32_340	375768	376832	-	355	K02638	petE	plastocyanin	hypothetical protein	Photosynthesis	-	2.6e-06	23.8	75.8	355
RIFOXYC2_FULL_PER-ii_58_32_341	376829	378463	-	545	K08647	PAPPA2	pappalysin-2 [EC:3.4.24.-]: lipoprotein	hypothetical protein	-	-	5.9e-08	26.5	301.5	545
RIFOXYC2_FULL_PER-ii_58_32_342	378481	378795	-	105	K13974	EHCBP	calcium-binding protein	hypothetical protein	-	-	0.00016	17.9	240.8	105
RIFOXYC2_FULL_PER-ii_58_32_343	378960	379964	+	335	K02340	DPO3D1, holA	DNA polymerase III subunit delta [EC:2.7.7.7]	holA; DNA polymerase III subunit delta; K02340 DNA polymerase III subunit delta [EC:2.7.7.7]	DNA replication Homologous recombination Mismatch repair Purine metabolism Pyrimidine metabolism	M00260	1.1e-47	158.7	98.5	335
RIFOXYC2_FULL_PER-ii_58_32_344	379973	380398	-	142	K02399	flgN	flagella synthesis protein FlgN	hypothetical protein	Flagellar assembly	-	0.00014	17.6	18.2	142
RIFOXYC2_FULL_PER-ii_58_32_345	380478	381026	-	183	K03624	greA	transcription elongation factor GreA	greA; transcription elongation factor GreA; K03624 transcription elongation factor GreA	-	-	1.6e-63	209.9	54	183
RIFOXYC2_FULL_PER-ii_58_32_346	381099	384386	-	1096	K11541	URA2	carbamoyl-phosphate synthase / aspartate carbamoyltransferase [EC:6.3.5.5 2.1.3.2]	carbamoyl-phosphate synthase, large subunit (EC:6.3.4.16); K01955 carbamoyl-phosphate synthase large subunit [EC:6.3.5.5]	Alanine, aspartate and glutamate metabolism Pyrimidine metabolism	M00051	0	1587.1	473.1	1096
RIFOXYC2_FULL_PER-ii_58_32_347	384517	385359	+	281	K19049	cslA	chondroitin AC lyase [EC:4.2.2.5]	S-layer protein	-	-	3.2e-08	27.4	299.3	281
RIFOXYC2_FULL_PER-ii_58_32_348	385367	386362	-	332	K15268	eamA	O-acetylserine/cysteine efflux transporter	Uncharacterized protein	-	-	1.7e-15	52.7	85.2	332
RIFOXYC2_FULL_PER-ii_58_32_349	386421	388304	-	628	K07762	PAPPA	pappalysin-1 [EC:3.4.24.79]	hypothetical protein	-	-	8.1e-12	39.5	216.9	628
RIFOXYC2_FULL_PER-ii_58_32_350	388570	389793	-	408	K07284	srtA	sortase A [EC:3.4.22.70]	putative sortase	-	-	4.5e-28	94.2	20.5	408
RIFOXYC2_FULL_PER-ii_58_32_351	389863	390984	-	374	K00566	mnmA, trmU, TRMU	tRNA-specific 2-thiouridylase [EC:2.8.1.-]	tRNA (5-methylaminomethyl-2-thiouridylate)-methyltransferase; K00566 tRNA-specific 2-thiouridylase [EC:2.8.1.-]	Sulfur relay system	-	2e-119	394.9	29.4	374
RIFOXYC2_FULL_PER-ii_58_32_352	391049	392101	+	351	K02835	prfA, MTRF1, MRF1	peptide chain release factor 1	peptide chain release factor 1; K02835 peptide chain release factor 1	-	-	2.5e-148	491.4	46.8	351
RIFOXYC2_FULL_PER-ii_58_32_353	392098	392436	-	113	K15337	acpK	polyketide biosynthesis acyl carrier protein	hypothetical protein	-	-	0.00026	17	83.7	113
RIFOXYC2_FULL_PER-ii_58_32_354	392491	393819	-	443	K13713	purCD	fusion protein PurCD [EC:6.3.2.6 6.3.4.13]	phosphoribosylamine/glycine ligase	Purine metabolism	M00048	1.3e-149	495.7	590.1	443
RIFOXYC2_FULL_PER-ii_58_32_355	393899	395404	-	502	K00764	purF, PPAT	amidophosphoribosyltransferase [EC:2.4.2.14]	amidophosphoribosyltransferase (EC:2.4.2.14); K00764 amidophosphoribosyltransferase [EC:2.4.2.14]	Alanine, aspartate and glutamate metabolism Purine metabolism	M00048	7.8e-200	660.9	123.3	502
RIFOXYC2_FULL_PER-ii_58_32_356	395607	396452	-	282	K01491	folD	methylenetetrahydrofolate dehydrogenase (NADP+) / methenyltetrahydrofolate cyclohydrolase [EC:1.5.1.5 3.5.4.9]	Methylenetetrahydrofolate dehydrogenase (NADP+) / Methenyltetrahydrofolate cyclohydrolase (EC:1.5.1.5 3.5.4.9)	Carbon fixation pathways in prokaryotes One carbon pool by folate	M00140; M00377	1.5e-118	392.8	40.8	282
RIFOXYC2_FULL_PER-ii_58_32_357	396590	397687	+	366	K06941	rlmN	23S rRNA (adenine2503-C2)-methyltransferase [EC:2.1.1.192]	radical SAM enzyme, Cfr family; K06941 23S rRNA (adenine2503-C2)-methyltransferase [EC:2.1.1.192]	-	-	2.2e-107	355.9	43.1	366
RIFOXYC2_FULL_PER-ii_58_32_358	397919	398500	-	194	K00943	tmk, DTYMK	dTMP kinase [EC:2.7.4.9]	thymidylate kinase; K00943 dTMP kinase [EC:2.7.4.9]	Pyrimidine metabolism	M00053	2.9e-50	167.1	37.1	194
RIFOXYC2_FULL_PER-ii_58_32_359	398573	399010	+	146	-	-	-	hypothetical protein	-	-	-	-	-	146
RIFOXYC2_FULL_PER-ii_58_32_360	399012	401429	+	806	K03696	clpC	ATP-dependent Clp protease ATP-binding subunit ClpC	hypothetical protein	-	-	4.2e-140	464.8	52.8	806
RIFOXYC2_FULL_PER-ii_58_32_361	401438	402775	-	446	K08151	tetA	MFS transporter, DHA1 family, tetracycline resistance protein	Major facilitator superfamily domain-containing protein 10 Tetracycline transporter-like protein	-	M00668	2e-92	306.1	97.9	446
RIFOXYC2_FULL_PER-ii_58_32_362	402956	403186	-	77	-	-	-	hypothetical protein	-	-	-	-	-	77
RIFOXYC2_FULL_PER-ii_58_32_363	403539	403724	-	62	K04894	KCNE1	potassium voltage-gated channel Isk-related subfamily E member 1	hypothetical protein	-	-	0.00028	16.8	78.7	62
RIFOXYC2_FULL_PER-ii_58_32_364	403887	404681	-	265	-	-	-	hypothetical protein	-	-	-	-	-	265
RIFOXYC2_FULL_PER-ii_58_32_365	404738	406372	-	545	K04077	groEL, HSPD1	chaperonin GroEL	groEL; 60 kDa chaperonin; K04077 chaperonin GroEL	RNA degradation	-	1.3e-251	833.2	50.2	545
RIFOXYC2_FULL_PER-ii_58_32_366	406449	406787	-	113	K04078	groES, HSPE1	chaperonin GroES	Co-chaperonin GroES	-	-	7.6e-28	93.7	16.7	113
RIFOXYC2_FULL_PER-ii_58_32_367	406948	407466	+	173	-	-	-	hypothetical protein	-	-	-	-	-	173
RIFOXYC2_FULL_PER-ii_58_32_368	407563	409014	+	484	K05849	SLC8A, NCX	solute carrier family 8 (sodium/calcium exchanger)	hypothetical protein	Calcium signaling pathway cGMP-PKG signaling pathway	-	2e-54	180.9	206.7	484
RIFOXYC2_FULL_PER-ii_58_32_369	409066	409524	-	153	K01533	copB	Cu2+-exporting ATPase [EC:3.6.3.4]	haloacid dehalogenase	-	-	8.7e-10	33.2	901.6	153
RIFOXYC2_FULL_PER-ii_58_32_370	409745	409957	-	71	-	-	-	hypothetical protein	-	-	-	-	-	71
RIFOXYC2_FULL_PER-ii_58_32_371	410002	412023	+	674	K02847	waaL, rfaL	O-antigen ligase [EC:2.4.1.-]	O-antigen polymerase	Lipopolysaccharide biosynthesis	M00080	2.8e-18	61.8	98.5	674
RIFOXYC2_FULL_PER-ii_58_32_372	412066	412572	+	169	-	-	-	hypothetical protein	-	-	-	-	-	169
RIFOXYC2_FULL_PER-ii_58_32_373	412725	412856	-	44	-	-	-	hypothetical protein	-	-	-	-	-	44
RIFOXYC2_FULL_PER-ii_58_32_374	413133	414425	-	431	K01754	E4.3.1.19, ilvA, tdcB	threonine dehydratase [EC:4.3.1.19]	ilvA; threonine dehydratase (EC:4.3.1.19); K01754 threonine dehydratase [EC:4.3.1.19]	Glycine, serine and threonine metabolism Valine, leucine and isoleucine biosynthesis	M00570	1.4e-118	392.3	105.3	431
RIFOXYC2_FULL_PER-ii_58_32_375	414831	415772	+	314	K06298	gerM	germination protein M	hypothetical protein	-	-	1.7e-12	43.1	66.5	314
RIFOXYC2_FULL_PER-ii_58_32_376	415793	416260	-	156	K03972	pspE	phage shock protein E	hypothetical protein	-	-	0.0047	12.5	35.3	156
RIFOXYC2_FULL_PER-ii_58_32_377	416382	418451	+	690	K03655	recG	ATP-dependent DNA helicase RecG [EC:3.6.4.12]	recG; putative ATP-dependent DNA helicase (EC:3.6.4.12)	Homologous recombination	-	2.3e-218	723.4	63.5	690
RIFOXYC2_FULL_PER-ii_58_32_378	418473	419111	+	213	K05747	WAS	Wiskott-Aldrich syndrome protein	coiled-coil	Adherens junction Regulation of actin cytoskeleton	-	4.8e-06	21.5	81.3	213
RIFOXYC2_FULL_PER-ii_58_32_379	419370	419933	-	188	K02455	gspF	general secretion pathway protein F	hypothetical protein	Bacterial secretion system	M00331	1.5e-08	30	110.3	188
RIFOXYC2_FULL_PER-ii_58_32_380	419953	420888	-	312	K17298	MUC13	mucin-13	hypothetical protein	-	-	0.00067	14.6	61.4	312
RIFOXYC2_FULL_PER-ii_58_32_381	420992	421714	-	241	K03981	dsbC	thiol:disulfide interchange protein DsbC [EC:5.3.4.1]	DSBA-like thioredoxin domain-containing protein	-	-	1.6e-14	50.1	100.1	241
RIFOXYC2_FULL_PER-ii_58_32_382	421872	423257	-	462	K18346	vanW	vancomycin resistance protein VanW	von Willebrand factor A	Two-component system	M00651	1.3e-18	63.2	19	462
RIFOXYC2_FULL_PER-ii_58_32_383	423666	423803	-	46	-	-	-	hypothetical protein	-	-	-	-	-	46
RIFOXYC2_FULL_PER-ii_58_32_384	423832	424725	-	298	K08369	ydjE	MFS transporter, putative metabolite:H+ symporter	hypothetical protein	-	-	0.0048	11.5	111.2	298
RIFOXYC2_FULL_PER-ii_58_32_385	424813	426120	-	436	K03979	obg	GTP-binding protein	Obg family GTPase CgtA	-	-	2e-149	494.8	61.5	436
RIFOXYC2_FULL_PER-ii_58_32_386	426192	427262	+	357	K02481	K02481	two-component system, NtrC family, response regulator	two component sigma54 specific Fis family transcriptional regulator; K07712 two-component system, NtrC family, nitrogen regulation response regulator GlnG	-	-	3.7e-78	259.5	458.5	357
RIFOXYC2_FULL_PER-ii_58_32_387	427360	429249	+	630	K04043	dnaK	molecular chaperone DnaK	dnaK; molecular chaperone DnaK; K04043 molecular chaperone DnaK	RNA degradation	-	9.6e-290	958.9	71.6	630
RIFOXYC2_FULL_PER-ii_58_32_388	429263	429958	-	232	K01890	FARSB, pheT	phenylalanyl-tRNA synthetase beta chain [EC:6.1.1.20]	lysS; lysyl-tRNA synthetase (EC:6.1.1.6); K04567 lysyl-tRNA synthetase, class II [EC:6.1.1.6]	Aminoacyl-tRNA biosynthesis	M00359; M00360	8.9e-05	16.7	129.1	232
RIFOXYC2_FULL_PER-ii_58_32_389	429962	430966	-	335	K00134	GAPDH, gapA	glyceraldehyde 3-phosphate dehydrogenase [EC:1.2.1.12]	gap; glyceraldehyde-3-phosphate dehydrogenase, type I (EC:1.2.1.-); K00134 glyceraldehyde 3-phosphate dehydrogenase [EC:1.2.1.12]	Carbon fixation in photosynthetic organisms Glycolysis / Gluconeogenesis HIF-1 signaling pathway	M00001; M00002; M00003; M00165; M00166; M00308; M00552	3e-149	494.6	16.4	335
RIFOXYC2_FULL_PER-ii_58_32_390	431107	431940	-	278	K01151	nfo	deoxyribonuclease IV [EC:3.1.21.2]	Endonuclease IV (EC:3.1.21.2); K01151 deoxyribonuclease IV [EC:3.1.21.2]	Base excision repair	-	6e-64	212.5	35.9	278
RIFOXYC2_FULL_PER-ii_58_32_391	431960	433315	+	452	K00970	pcnB	poly(A) polymerase [EC:2.7.7.19]	polynucleotide adenylyltransferase/metal dependent phosphohydrolase	RNA degradation	-	1.3e-107	356.5	86.2	452
RIFOXYC2_FULL_PER-ii_58_32_392	433745	434602	-	286	-	-	-	hypothetical protein	-	-	-	-	-	286
RIFOXYC2_FULL_PER-ii_58_32_393	434809	435099	+	97	-	-	-	hypothetical protein	-	-	-	-	-	97
RIFOXYC2_FULL_PER-ii_58_32_394	435288	437480	+	731	K05988	dexA	dextranase [EC:3.2.1.11]	YALI0F21450p	-	-	1.8e-06	22.4	174.7	731
RIFOXYC2_FULL_PER-ii_58_32_395	437544	437990	-	149	K02939	RP-L9, MRPL9, rplI	large subunit ribosomal protein L9	50S ribosomal protein L9; K02939 large subunit ribosomal protein L9	Ribosome	M00178	3.7e-31	105.2	24.6	149
RIFOXYC2_FULL_PER-ii_58_32_396	438094	440304	-	737	K02035	ABC.PE.S	peptide/nickel transport system substrate-binding protein	oligopeptide-binding protein; K02035 peptide/nickel transport system substrate-binding protein	-	M00239	2.2e-67	224.2	14.6	737
RIFOXYC2_FULL_PER-ii_58_32_397	440334	440546	-	71	K03075	secG	preprotein translocase subunit SecG	secG; preprotein translocase subunit SecG; K03075 preprotein translocase subunit SecG	Bacterial secretion system Protein export	M00335	9.8e-13	44.6	23	71
							tRNA (Val)
RIFOXYC2_FULL_PER-ii_58_32_398	441048	442712	+	555	K13735	yeeJ	adhesin/invasin	hypothetical protein	-	-	0.00023	14.6	76.6	555
RIFOXYC2_FULL_PER-ii_58_32_399	442790	443110	-	107	K07240	chrA	chromate transporter	seg	-	-	0.0012	13.8	15.7	107
RIFOXYC2_FULL_PER-ii_58_32_400	443140	443421	-	94	K06960	K06960	COG: COG1837	hypothetical protein	-	-	7.5e-21	70.6	54.7	94
RIFOXYC2_FULL_PER-ii_58_32_401	443465	443845	-	127	K02959	RP-S16, MRPS16, rpsP	small subunit ribosomal protein S16	rpsP; 30S ribosomal protein S16; K02959 small subunit ribosomal protein S16	Ribosome	M00178	1.1e-30	103.5	22.2	127
RIFOXYC2_FULL_PER-ii_58_32_402	444072	444392	-	107	-	-		hypothetical protein	-	-	-	-	-	107
RIFOXYC2_FULL_PER-ii_58_32_403	444444	445580	+	379	K00754	E2.4.1.-	-	group 1 glycosyl transferase	Fructose and mannose metabolism	-	4.8e-33	110.9	197.1	379
RIFOXYC2_FULL_PER-ii_58_32_404	445577	446383	+	269	K02493	hemK, prmC, HEMK	release factor glutamine methyltransferase [EC:2.1.1.297]	prmA; ribosomal protein L11 methyltransferase (EC:2.1.1.-); K02493 release factor glutamine methyltransferase [EC:2.1.1.-]	-	-	1.1e-72	241.6	46.5	269
RIFOXYC2_FULL_PER-ii_58_32_405	446396	447634	+	413	K01939	purA, ADSS	adenylosuccinate synthase [EC:6.3.4.4]	hypothetical protein ; K01939 adenylosuccinate synthase [EC:6.3.4.4]	Alanine, aspartate and glutamate metabolism Purine metabolism	M00049	4.7e-164	543.3	63.6	413
RIFOXYC2_FULL_PER-ii_58_32_406	447671	448549	-	293	K00858	ppnK, NADK	NAD+ kinase [EC:2.7.1.23]	ATP-NAD/AcoX kinase; K00858 NAD+ kinase [EC:2.7.1.23]	Nicotinate and nicotinamide metabolism	-	8.8e-76	251.6	22.7	293
RIFOXYC2_FULL_PER-ii_58_32_407	448567	449628	-	354	K12994	wbpY, wbdB	alpha-1,3-rhamnosyl/mannosyltransferase [EC:2.4.1.-]	AprM	-	-	1.3e-63	211	277.8	354
RIFOXYC2_FULL_PER-ii_58_32_408	449676	450257	+	194	K17261	CAP1_2, SRV2	adenylyl cyclase-associated protein	hypothetical protein	-	-	0.0027	12.5	34	194
RIFOXYC2_FULL_PER-ii_58_32_409	450313	450645	+	111	-	-	-	hypothetical protein	-	-	-	-	-	111
RIFOXYC2_FULL_PER-ii_58_32_410	450631	451398	-	256	K01100	E3.1.3.37	sedoheptulose-bisphosphatase [EC:3.1.3.37]	fbP-1; fructose-1,6-bisphosphatase (EC:3.1.3.11); K03841 fructose-1,6-bisphosphatase I [EC:3.1.3.11]	Carbon fixation in photosynthetic organisms //many pathways	M00165; M00167	7.1e-91	300.8	184.5	256
RIFOXYC2_FULL_PER-ii_58_32_411	451591	452604	-	338	K00134	GAPDH, gapA	glyceraldehyde 3-phosphate dehydrogenase [EC:1.2.1.12]	glyceraldehyde-3-phosphate dehydrogenase, type I; K00134 glyceraldehyde 3-phosphate dehydrogenase [EC:1.2.1.12]	Carbon fixation in photosynthetic organisms Glycolysis / Gluconeogenesis HIF-1 signaling pathway	M00001; M00002; M00003; M00165; M00166; M00308; M00552	6.7e-143	473.6	16.4	338
RIFOXYC2_FULL_PER-ii_58_32_412	452663	453721	-	353	K01000	mraY	phospho-N-acetylmuramoyl-pentapeptide-transferase [EC:2.7.8.13]	phospho-N-acetylmuramoyl-pentapeptide-transferase (EC:2.7.8.13); K01000 phospho-N-acetylmuramoyl-pentapeptide-transferase [EC:2.7.8.13]	Peptidoglycan biosynthesis	-	1.5e-99	330.5	68.7	353
RIFOXYC2_FULL_PER-ii_58_32_413	453797	455152	-	452	K02314	dnaB	replicative DNA helicase [EC:3.6.4.12]	replicative DNA helicase; K02314 replicative DNA helicase [EC:3.6.4.12]	Cell cycle - Caulobacter DNA replication	-	7.2e-161	532.4	36.4	452
RIFOXYC2_FULL_PER-ii_58_32_414	455277	455783	-	169	K01515	nudF	ADP-ribose pyrophosphatase [EC:3.6.1.13]	ADP-ribose pyrophosphatase (EC:3.6.1.13); K01515 ADP-ribose pyrophosphatase [EC:3.6.1.13]	Purine metabolism	-	1.4e-30	103.3	25.9	169
RIFOXYC2_FULL_PER-ii_58_32_415	455857	456231	-	125	K07016	csm1, cas10	CRISPR-associated protein Csm1	S23 ribosomal protein	-	-	0.0073	11	116.9	125
RIFOXYC2_FULL_PER-ii_58_32_416	456293	457354	-	354	K03553	recA	recombination protein RecA	recA; recombinase A; K03553 recombination protein RecA	Homologous recombination	M00729	1.4e-170	564	25.3	354
RIFOXYC2_FULL_PER-ii_58_32_417	457469	458404	-	312	-	-	-	hypothetical protein	-	-	-	-	-	312
RIFOXYC2_FULL_PER-ii_58_32_418	458425	459531	-	369	K03086	SIG1, rpoD	RNA polymerase primary sigma factor	hypothetical protein	-	-	1.2e-20	70.3	32.1	369
RIFOXYC2_FULL_PER-ii_58_32_419	459801	460181	-	127	K07447	ruvX	putative holliday junction resolvase [EC:3.1.-.-]	hypothetical protein; K07447 putative holliday junction resolvase [EC:3.1.-.-]	-	-	1.4e-23	79.5	36.4	127
RIFOXYC2_FULL_PER-ii_58_32_420	460182	460454	-	91	K02968	RP-S20, rpsT	small subunit ribosomal protein S20	rpsT; 30S ribosomal protein S20; K02968 small subunit ribosomal protein S20	Ribosome	M00178	7.4e-17	57.9	22.9	91
RIFOXYC2_FULL_PER-ii_58_32_421	460626	462398	+	591	K00820	glmS, GFPT	glucosamine--fructose-6-phosphate aminotransferase (isomerizing) [EC:2.6.1.16]	glucosamine/fructose-6-phosphate aminotransferase; K00820 glucosamine--fructose-6-phosphate aminotransferase (isomerizing) [EC:2.6.1.16]	Alanine, aspartate and glutamate metabolism Amino sugar and nucleotide sugar metabolism	-	1.6e-209	693.9	71.1	591
RIFOXYC2_FULL_PER-ii_58_32_422	462586	465156	-	857	K03587	ftsI	cell division protein FtsI (penicillin-binding protein 3)	ftsI; cell division protein FtsI; K03587 cell division protein FtsI (penicillin-binding protein 3) [EC:2.4.1.129]	Peptidoglycan biosynthesis	-	4.7e-157	520	140.7	857
RIFOXYC2_FULL_PER-ii_58_32_423	465330	466448	+	373	K02454	gspE	general secretion pathway protein E	type II secretion system protein E; K02454 general secretion pathway protein E	Bacterial secretion system	M00331	1.1e-128	426.6	26.3	373
RIFOXYC2_FULL_PER-ii_58_32_424	466662	468368	+	569	-	-		FecR protein	-	-	-	-	-	569
RIFOXYC2_FULL_PER-ii_58_32_425	468652	469239	-	196	K09019	rutE	3-hydroxypropanoate dehydrogenase [EC:1.1.1.-]	nitroreductase	Pyrimidine metabolism	-	2.6e-17	59.1	94.2	196
RIFOXYC2_FULL_PER-ii_58_32_426	469267	470208	-	314	K06180	rluD	23S rRNA pseudouridine1911/1915/1917 synthase [EC:5.4.99.23]	RluA family pseudouridine synthase (EC:3.2.1.17); K06180 23S rRNA pseudouridine1911/1915/1917 synthase [EC:5.4.99.23]	-	-	1.1e-97	324.3	42.3	314
RIFOXYC2_FULL_PER-ii_58_32_427	470269	471423	+	385	K01866	YARS, tyrS	tyrosyl-tRNA synthetase [EC:6.1.1.1]	tyrZ; tyrosyl-tRNA synthetase (EC:6.1.1.1); K01866 tyrosyl-tRNA synthetase [EC:6.1.1.1]	Aminoacyl-tRNA biosynthesis	M00359; M00360	4.1e-145	480	45.2	385
RIFOXYC2_FULL_PER-ii_58_32_428	471451	471762	+	104	-	-	-	hypothetical protein	-	-	-	-	-	104
RIFOXYC2_FULL_PER-ii_58_32_429	471925	472074	-	50	K02415	fliL	flagellar FliL protein	hypothetical protein	-	-	0.0058	12.5	36.7	50
RIFOXYC2_FULL_PER-ii_58_32_430	472141	472371	-	77	-	-	-	hypothetical protein	-	-	-	-	-	77
RIFOXYC2_FULL_PER-ii_58_32_431	472545	472775	+	77	-	-	-	hypothetical protein	-	-	-	-	-	77
RIFOXYC2_FULL_PER-ii_58_32_432	472772	473908	-	379	K00027	ME2, sfcA, maeA	malate dehydrogenase (oxaloacetate-decarboxylating) [EC:1.1.1.38]	Malic enzyme (EC:1.1.1.38)	Pyruvate metabolism Two-component system	-	1.1e-173	574	53	379
RIFOXYC2_FULL_PER-ii_58_32_433	474046	474597	+	184	-	-	-	hypothetical protein	-	-	-	-	-	184
RIFOXYC2_FULL_PER-ii_58_32_434	474788	475243	+	152	K03646	tolA	colicin import membrane protein	hypothetical protein	-	-	3.7e-05	19	56	152
RIFOXYC2_FULL_PER-ii_58_32_435	475251	475526	+	92	K05971	E3.1.1.61	-	hypothetical protein	-	-	0.0045	11.7	294.2	92
RIFOXYC2_FULL_PER-ii_58_32_436	475976	477514	+	513	K07704	lytS	two-component system, LytT family, sensor histidine kinase LytS [EC:2.7.13.3]	hypothetical protein	Two-component system	M00492	0.00018	15.9	73.1	513
RIFOXYC2_FULL_PER-ii_58_32_437	477581	478390	+	270	K02825	pyrR	pyrimidine operon attenuation protein / uracil phosphoribosyltransferase [EC:2.4.2.9]	hypothetical protein	Pyrimidine metabolism	-	1.6e-07	26.8	19.7	270
RIFOXYC2_FULL_PER-ii_58_32_438	478551	478814	+	88	K03175	TRAF6	TNF receptor-associated factor 6	hypothetical protein	Endocytosis MAPK signaling pathway NF-kappa B signaling pathway Ubiquitin mediated proteolysis	M00686	9.7e-06	20.4	224.9	88
RIFOXYC2_FULL_PER-ii_58_32_439	478924	479985	-	354	-	-	-	hypothetical protein	-	-	-	-	-	354
RIFOXYC2_FULL_PER-ii_58_32_440	480064	480762	+	233	-	-	-	hypothetical protein	-	-	-	-	-	233
RIFOXYC2_FULL_PER-ii_58_32_441	480849	481208	-	120	-	-	-	hypothetical protein	-	-	-	-	-	120
RIFOXYC2_FULL_PER-ii_58_32_442	481463	482023	+	187	-	-	-	hypothetical protein	-	-	-	-	-	187
RIFOXYC2_FULL_PER-ii_58_32_443	482152	482535	-	128	K03191	ureI	acid-activated urea channel	hypothetical protein	-	-	0.0044	13.5	18.5	128
RIFOXYC2_FULL_PER-ii_58_32_444	482559	482963	-	135	K07185	tspO	tryptophan-rich sensory protein	TspO and MBR-like protein; K07185 tryptophan-rich sensory protein	-	-	1.2e-36	122	53.4	135
RIFOXYC2_FULL_PER-ii_58_32_445	482960	483298	-	113	-	-	-	hypothetical protein	-	-	-	-	-	113
RIFOXYC2_FULL_PER-ii_58_32_446	483369	484232	+	288	K00548	metH, MTR	5-methyltetrahydrofolate--homocysteine methyltransferase [EC:2.1.1.13]	Homocysteine S-methyltransferase/B12 binding domain/Pterin binding enzyme	Cysteine and methionine metabolism One carbon pool by folate Selenocompound metabolism	M00017	8.5e-67	221.5	151.6	288
RIFOXYC2_FULL_PER-ii_58_32_447	484369	485175	+	269	K00558	DNMT1, dcm	DNA (cytosine-5)-methyltransferase 1 [EC:2.1.1.37]	dcm; Type II cytosine-5 DNA methyltransferase; K00558 DNA (cytosine-5-)-methyltransferase [EC:2.1.1.37]	Cysteine and methionine metabolism	M00035	1.4e-65	217.8	22.9	269
RIFOXYC2_FULL_PER-ii_58_32_448	485571	486608	+	346	-	-	-	hypothetical protein	-	-	-	-	-	346
RIFOXYC2_FULL_PER-ii_58_32_449	486631	486909	+	93	-	-	-	hypothetical protein	-	-	-	-	-	93
RIFOXYC2_FULL_PER-ii_58_32_450	486893	487696	-	268	-	-	-	hypothetical protein	-	-	-	-	-	268
RIFOXYC2_FULL_PER-ii_58_32_451	488245	488505	-	87	-	-		hypothetical protein	-	-	-	-	-	87
RIFOXYC2_FULL_PER-ii_58_32_452	488825	489322	+	166	-	-	-	id=3012806	-	-	-	-	-	166
RIFOXYC2_FULL_PER-ii_58_32_453	489542	490468	-	309	K04763	xerD	integrase/recombinase XerD	putative Tyrosine recombinase xerD	-	-	2e-79	264	43.1	309
RIFOXYC2_FULL_PER-ii_58_32_454	490502	491248	-	249	K03748	sanA	SanA protein	hypothetical protein	-	-	2.5e-10	36	15.5	249
RIFOXYC2_FULL_PER-ii_58_32_455	491255	492847	-	531	-	-	-	Putative uncharacterized protein	-	-	-	-	-	531
RIFOXYC2_FULL_PER-ii_58_32_456	492992	494200	-	403	K00927	PGK, pgk	phosphoglycerate kinase [EC:2.7.2.3]	phosphoglycerate kinase (EC:2.7.2.3); K00927 phosphoglycerate kinase [EC:2.7.2.3]	Carbon fixation in photosynthetic organisms Glycolysis / Gluconeogenesis	M00001; M00002; M00003; M00165; M00166; M00308; M00552	2e-148	491.5	49	403
RIFOXYC2_FULL_PER-ii_58_32_457	494167	494664	-	166	K00014	aroE	shikimate dehydrogenase [EC:1.1.1.25]	hypothetical protein	Phenylalanine, tyrosine and tryptophan biosynthesis	M00022	3.8e-07	25.4	15.9	166
RIFOXYC2_FULL_PER-ii_58_32_458	494696	495784	+	363	K02851	wecA, tagO, rfe	UDP-GlcNAc:undecaprenyl-phosphate GlcNAc-1-phosphate transferase [EC:2.7.8.33]	glycosyl transferase; K13685 UDP-N-acetylglucosamine:undecaprenyl-P N-acetylglucosaminyl 1-P transferase [EC:2.7.8.-]	-	-	5.6e-55	182.6	90.5	363
RIFOXYC2_FULL_PER-ii_58_32_459	495818	497278	-	487	K19304	mepM	murein DD-endopeptidase [EC:3.4.24.-]	M23B subfamily peptidase	-	-	6.5e-26	87.3	130.4	487
RIFOXYC2_FULL_PER-ii_58_32_460	497329	498345	+	339	K06925	tsaE	tRNA threonylcarbamoyladenosine biosynthesis protein TsaE	hypothetical protein	-	-	4e-32	108	59.9	339
RIFOXYC2_FULL_PER-ii_58_32_461	498358	499128	+	257	K16267	zipB	zinc and cadmium transporter	zinc/iron permease	-	-	3.4e-67	222.6	162.5	257
RIFOXYC2_FULL_PER-ii_58_32_462	499139	499732	-	198	-	-	-	hypothetical protein	-	-	-	-	-	198
RIFOXYC2_FULL_PER-ii_58_32_463	499805	501082	-	426	K07478	ycaJ	putative ATPase	ATPase; K07478 putative ATPase	-	-	6.8e-194	641.8	90.6	426
RIFOXYC2_FULL_PER-ii_58_32_464	501269	501655	+	129	K01485	codA	cytosine deaminase [EC:3.5.4.1]	hypothetical protein	Arginine and proline metabolism Pyrimidine metabolism	-	0.003	12.3	261.9	129
RIFOXYC2_FULL_PER-ii_58_32_465	501671	501919	+	83	K03688	ubiB, aarF	ubiquinone biosynthesis protein	hypothetical protein	-	-	0.006	11.2	389.3	83
RIFOXYC2_FULL_PER-ii_58_32_466	501932	502930	-	333	K00791	miaA, TRIT1	tRNA dimethylallyltransferase [EC:2.5.1.75]	miaA; tRNA delta(2)-isopentenylpyrophosphate transferase (EC:2.5.1.75); K00791 tRNA dimethylallyltransferase [EC:2.5.1.75]	Zeatin biosynthesis	-	5.2e-90	298.5	25.5	333
RIFOXYC2_FULL_PER-ii_58_32_467	503117	503761	+	215	K01358	clpP, CLPP	ATP-dependent Clp protease, protease subunit [EC:3.4.21.92]	ATP-dependent Clp protease proteolytic subunit ClpP (EC:3.4.21.92); K01358 ATP-dependent Clp protease, protease subunit [EC:3.4.21.92]	Cell cycle - Caulobacter	-	3.2e-102	339.4	35.6	215
RIFOXYC2_FULL_PER-ii_58_32_468	503847	504281	-	145	K15977	K15977	putative oxidoreductase	hypothetical protein	-	-	0.00025	16.8	24.8	145
RIFOXYC2_FULL_PER-ii_58_32_469	504356	505465	+	370	K00773	tgt, QTRT1	queuine tRNA-ribosyltransferase [EC:2.4.2.29]	queuine tRNA-ribosyltransferase (EC:2.4.2.29); K00773 queuine tRNA-ribosyltransferase [EC:2.4.2.29]	-	-	1.7e-139	462.8	54.3	370
RIFOXYC2_FULL_PER-ii_58_32_470	505462	505776	-	105	K02888	RP-L21, MRPL21, rplU	large subunit ribosomal protein L21	rplU; 50S ribosomal protein L21; K02888 large subunit ribosomal protein L21	Ribosome	M00178	4.7e-40	133.7	23.9	105
							tRNA (Gln)
RIFOXYC2_FULL_PER-ii_58_32_471	506557	518139	+	3861	K11238	BNI1	cytokinesis protein. A protein with repeated DUF - likely cell surface; possibly a lipoprotein	hypothetical protein	MAPK signaling pathway - yeast	-	0.0022	11.5	300.7	3861
RIFOXYC2_FULL_PER-ii_58_32_472	518203	518760	-	186	K01056	PTH1, pth, spoVC	peptidyl-tRNA hydrolase, PTH1 family [EC:3.1.1.29]	peptidyl-tRNA hydrolase (EC:3.1.1.29)	-	-	2.6e-59	197	30.5	186
RIFOXYC2_FULL_PER-ii_58_32_473	518818	519210	-	131	K00974	cca	tRNA nucleotidyltransferase (CCA-adding enzyme) [EC:2.7.7.72 3.1.3.- 3.1.4.-]	hypothetical protein cdivTM_00360	RNA transport	-	0.0016	13.2	33.3	131
RIFOXYC2_FULL_PER-ii_58_32_474	519215	519937	-	241	-	-	-	transmembrane_regions	-	-	-	-	-	241
RIFOXYC2_FULL_PER-ii_58_32_475	520026	520646	+	207	K03100	lepB	signal peptidase I [EC:3.4.21.89]	signal peptidase I (EC:3.4.21.89); K03100 signal peptidase I [EC:3.4.21.89]	Protein export	-	8.3e-54	179.4	16	207
RIFOXYC2_FULL_PER-ii_58_32_476	520831	521022	+	64	K03073	secE	preprotein translocase subunit SecE	hypothetical protein	Bacterial secretion system Protein export	M00335	1.5e-16	57.2	16.9	64
RIFOXYC2_FULL_PER-ii_58_32_477	521057	521602	+	182	K02601	nusG	transcriptional antiterminator NusG	nusG; transcription antitermination factor	-	-	3.3e-70	232.2	34.3	182
RIFOXYC2_FULL_PER-ii_58_32_478	521613	522002	-	130	K03873	TCEB2	transcription elongation factor B, polypeptide 2	hypothetical protein	HIF-1 signaling pathway Ubiquitin mediated proteolysis	M00383; M00388	0.0036	13.4	180.1	130
RIFOXYC2_FULL_PER-ii_58_32_479	522113	522382	+	90	K01512	acyP	acylphosphatase [EC:3.6.1.7]	acylphosphatase; K01512 acylphosphatase [EC:3.6.1.7]	Aminobenzoate degradation Pyruvate metabolism	-	8.5e-29	97	22.3	90
RIFOXYC2_FULL_PER-ii_58_32_480	522397	523713	-	439	K03980	murJ, mviN	putative peptidoglycan lipid II flippase	hypothetical protein; K03980 virulence factor	Peptidoglycan biosynthesis	-	1.1e-61	205.2	135.3	439
RIFOXYC2_FULL_PER-ii_58_32_481	523782	524573	-	264	-	-	-	hypothetical protein	-	-	-	-	-	264
RIFOXYC2_FULL_PER-ii_58_32_482	524763	530018	+	1752	K07762	PAPPA	pappalysin-1 [EC:3.4.24.79]	hypothetical protein	-	-	3.5e-17	57.2	216.9	1752
RIFOXYC2_FULL_PER-ii_58_32_483	530015	532099	+	695	K07762	PAPPA	pappalysin-1 [EC:3.4.24.79]: lipoprotein	putative lipoprotein	-	-	5.5e-08	26.8	216.9	695
RIFOXYC2_FULL_PER-ii_58_32_484	532189	533070	-	294	K06872	K06872	uncharacterized protein	hypothetical protein	-	-	1.3e-67	223.9	26	294
RIFOXYC2_FULL_PER-ii_58_32_485	533070	533636	-	189	K03744	lemA	LemA protein	LemA family protein; K03744 LemA protein	-	-	1e-76	254.1	24.1	189
RIFOXYC2_FULL_PER-ii_58_32_486	533679	534224	-	182	K03652	MPG	DNA-3-methyladenine glycosylase [EC:3.2.2.21]	DNA-3-methyladenine glycosylase; K03652 DNA-3-methyladenine glycosylase [EC:3.2.2.21]	Base excision repair	-	2.4e-69	230.9	16.3	182
							tRNA (Pro)
RIFOXYC2_FULL_PER-ii_58_32_487	534547	535101	+	185	K07002	K07002	COG: COG3545	hypothetical protein; K07002	-	-	1.4e-40	135	46.7	185
RIFOXYC2_FULL_PER-ii_58_32_488	535091	535447	-	119	-	-	-	hypothetical protein	-	-	-	-	-	119
RIFOXYC2_FULL_PER-ii_58_32_489	535624	536841	+	406	K07778	desK	two-component system, NarL family, sensor histidine kinase DesK [EC:2.7.13.3]	hypothetical protein	Two-component system	M00479	0.00075	14.4	94.5	406
RIFOXYC2_FULL_PER-ii_58_32_490	536850	537308	-	153	K03437	spoU	RNA methyltransferase, TrmH family	tRNA/rRNA methyltransferase SpoU	-	-	4.8e-34	114.1	86.8	153
RIFOXYC2_FULL_PER-ii_58_32_491	537411	538640	-	410	K01952	purL, PFAS	phosphoribosylformylglycinamidine synthase [EC:6.3.5.3]	purQ; Phosphoribosylformylglycinamidine synthase I (FGAM synthase I)	Purine metabolism	M00048	8.1e-70	231.8	58.9	410
							tRNA (Arg)
RIFOXYC2_FULL_PER-ii_58_32_492	538921	539628	+	236	K09903	pyrH	uridylate kinase [EC:2.7.4.22]	uridylate kinase (EC:2.7.4.22); K09903 uridylate kinase [EC:2.7.4.22]	Pyrimidine metabolism	-	1.8e-114	379.5	66.2	236
RIFOXYC2_FULL_PER-ii_58_32_493	539700	540245	+	182	K02838	frr, MRRF, RRF	ribosome recycling factor	ribosome recycling factor; K02838 ribosome recycling factor	-	-	2.3e-61	203.3	20	182
RIFOXYC2_FULL_PER-ii_58_32_494	540305	540544	+	80	-	-	-	hypothetical protein	-	-	-	-	-	80
RIFOXYC2_FULL_PER-ii_58_32_495	540541	541116	+	192	K10820	E3.6.3.17	monosaccharide-transporting ATPase [EC:3.6.3.17]	transmembrane_regions	-	-	0.0082	10.9	16.5	192
RIFOXYC2_FULL_PER-ii_58_32_496	541228	541749	+	174	-	-	-	hypothetical protein	-	-	-	-	-	174
RIFOXYC2_FULL_PER-ii_58_32_497	541853	542245	+	131	-	-	-	hypothetical protein	-	-	-	-	-	131
RIFOXYC2_FULL_PER-ii_58_32_498	542394	543821	+	476	K00873	PK, pyk	pyruvate kinase [EC:2.7.1.40]	pykF; pyruvate kinase (EC:2.7.1.40); K00873 pyruvate kinase [EC:2.7.1.40]	Glycolysis / Gluconeogenesis Purine metabolism Pyruvate metabolism	M00001; M00002; M00049; M00050	7.7e-172	569.7	15.3	476
RIFOXYC2_FULL_PER-ii_58_32_499	543848	545839	-	664	K07762	PAPPA	pappalysin-1 [EC:3.4.24.79]: C-rich repeat protein, signal peptide, TM domain and maybe cyto C terminus	hypothetical protein	-	-	2.5e-11	37.8	216.9	664
RIFOXYC2_FULL_PER-ii_58_32_500	545907	546281	-	125	K02663	pilN	type IV pilus assembly protein PilN	hypothetical protein	-	-	0.001	14.8	21.2	125
RIFOXYC2_FULL_PER-ii_58_32_501	546316	547212	-	299	K03438	mraW, rsmH	16S rRNA (cytosine1402-N4)-methyltransferase [EC:2.1.1.199]	methyltransferase; K03438 16S rRNA (cytosine1402-N4)-methyltransferase [EC:2.1.1.199]	-	-	2.2e-103	342.8	33.6	299
RIFOXYC2_FULL_PER-ii_58_32_502	547441	547965	+	175	-	-	-	transmembrane_regions	-	-	-	-	-	175
							tRNA (Ser)
RIFOXYC2_FULL_PER-ii_58_32_503	548171	548428	+	86	K07461	K07461	putative endonuclease;	Excinuclease ABC C subunit domain protein; K07461 putative endonuclease	-	-	8.2e-14	47.6	28.7	86
RIFOXYC2_FULL_PER-ii_58_32_504	548804	549661	+	286	K00845	glk	glucokinase [EC:2.7.1.2]	glucokinase (EC:2.7.1.2)	Amino sugar and nucleotide sugar metabolism Butirosin and neomycin biosynthesis Galactose metabolism Glycolysis / Gluconeogenesis Starch and sucrose metabolism Streptomycin biosynthesis	M00001; M00549	9.9e-67	221.8	39.9	286
RIFOXYC2_FULL_PER-ii_58_32_505	549733	550374	-	214	K08314	fsaB, talC	fructose-6-phosphate aldolase 2 [EC:4.1.2.-]	transaldolase; K00616 transaldolase [EC:2.2.1.2]	Pentose phosphate pathway if 2.2.1.2	-	1e-56	188	295.9	214
RIFOXYC2_FULL_PER-ii_58_32_506	550542	551339	+	266	K09916	K09916	hypothetical protein	seg	-	-	6.7e-06	22.3	16.7	266
RIFOXYC2_FULL_PER-ii_58_32_507	551343	551579	+	79	-	-	-	hypothetical protein	-	-	-	-	-	79
RIFOXYC2_FULL_PER-ii_58_32_508	551606	551818	+	71	K05728	CSK	c-src tyrosine kinase [EC:2.7.10.2]	hypothetical protein	-	-	0.0029	11.3	212.9	71
RIFOXYC2_FULL_PER-ii_58_32_509	552056	554344	+	763	K00615	E2.2.1.1, tktA, tktB	transketolase [EC:2.2.1.1]	transketolase; K00615 transketolase [EC:2.2.1.1]	Biosynthesis of ansamycins Carbon fixation in photosynthetic organisms Pentose phosphate pathway	M00004; M00007; M00165; M00167	3.9e-86	285.8	53.6	763
							tRNA (Ser)
RIFOXYC2_FULL_PER-ii_58_32_510	554734	558099	+	1122	K07483	K07483	transposase	integrase catalytic subunit	-	-	4.6e-06	22.3	20.1	1122
RIFOXYC2_FULL_PER-ii_58_32_511	558409	563268	+	1620	K07497	K07497	putative transposase	Integrase catalytic subunit	-	-	2.1e-05	19.5	31.3	1620
RIFOXYC2_FULL_PER-ii_58_32_512	563348	564388	+	347	K18650	pehX	exo-poly-alpha-galacturonosidase [EC:3.2.1.82]: Hydrolysis of pectic acid from the non-reducing end, releasing digalacturonate	Ig-like domain-containing protein,putative S-layer protein	-	-	1.3e-10	34.6	197.4	347
RIFOXYC2_FULL_PER-ii_58_32_513	564385	564780	+	132	K11753	ribF	riboflavin kinase / FMN adenylyltransferase [EC:2.7.1.26 2.7.7.2]	Riboflavin biosynthesis protein RibF	Riboflavin metabolism	M00125	1e-24	83.2	75.9	132
RIFOXYC2_FULL_PER-ii_58_32_514	564818	566125	+	436	K01928	murE	UDP-N-acetylmuramoyl-L-alanyl-D-glutamate--2,6-diaminopimelate ligase [EC:6.3.2.13]	UDP-N-acetylmuramyl tripeptide synthetase; K01928 UDP-N-acetylmuramoyl-L-alanyl-D-glutamate--2,6-diaminopimelate ligase [EC:6.3.2.13]	Lysine biosynthesis Peptidoglycan biosynthesis	-	3.8e-115	382.1	57.6	436
RIFOXYC2_FULL_PER-ii_58_32_515	566234	566953	+	240	K03470	rnhB	ribonuclease HII [EC:3.1.26.4]	rnhB; ribonuclease HII; K03470 ribonuclease HII [EC:3.1.26.4]	DNA replication	-	2.9e-74	246.7	30.6	240
RIFOXYC2_FULL_PER-ii_58_32_516	566757	567569	-	271	K13292	lgt, umpA	phosphatidylglycerol:prolipoprotein diacylglycerol transferase [EC:2.-.-.-]	lgt; prolipoprotein diacylglyceryl transferase; K13292 phosphatidylglycerol:prolipoprotein diacylglycerol transferase [EC:2.-.-.-]	-	-	3.4e-80	265.4	18.3	271
RIFOXYC2_FULL_PER-ii_58_32_517	567684	568478	-	265	K07284	srtA	sortase A [EC:3.4.22.70]	hypothetical protein	-	-	3.1e-25	84.8	20.5	265
RIFOXYC2_FULL_PER-ii_58_32_518	568566	569597	+	344	K01409	KAE1, tsaD, QRI7	N6-L-threonylcarbamoyladenine synthase [EC:2.3.1.234]	O-sialoglycoprotein endopeptidase; K01409 O-sialoglycoprotein endopeptidase [EC:3.4.24.57]	-	-	5.4e-121	400.6	25.6	344
RIFOXYC2_FULL_PER-ii_58_32_519	569674	571707	-	678	K04985	PKD1	polycystin 1	hypothetical protein	-	-	8.6e-22	71	557	678
RIFOXYC2_FULL_PER-ii_58_32_520	571713	572726	-	338	-	-	-	hypothetical protein	-	-	-	-	-	338
RIFOXYC2_FULL_PER-ii_58_32_521	572821	573696	-	292	-	-	-	hypothetical protein	-	-	-	-	-	292
RIFOXYC2_FULL_PER-ii_58_32_522	573762	580442	+	2227	-	-	-	lipoprotein	-	-	-	-	-	2227
RIFOXYC2_FULL_PER-ii_58_32_523	580539	583055	+	839	K01952	purL, PFAS	phosphoribosylformylglycinamidine synthase [EC:6.3.5.3]	purL; phosphoribosylformylglycinamidine synthase II	Purine metabolism	M00048	7.1e-190	629	45.8	839
RIFOXYC2_FULL_PER-ii_58_32_524	583137	584282	+	382	-	-	-	hypothetical protein	-	-	-	-	-	382
RIFOXYC2_FULL_PER-ii_58_32_525	584431	585705	+	425	K01400	nprE	bacillolysin [EC:3.4.24.28]	coiled-coil 564..592	-	-	6.2e-07	23.1	420	425
RIFOXYC2_FULL_PER-ii_58_32_526	585819	586427	-	203	-	-	-	transglutaminase domain-containing protein	-	-	-	-	-	203
RIFOXYC2_FULL_PER-ii_58_32_527	586477	587757	-	427	K01924	murC	UDP-N-acetylmuramate--alanine ligase [EC:6.3.2.8]	murC; UDP-N-acetylmuramate--L-alanine ligase; K01924 UDP-N-acetylmuramate--alanine ligase [EC:6.3.2.8]	D-Glutamine and D-glutamate metabolism Peptidoglycan biosynthesis	-	2.2e-118	392.7	87.9	427
RIFOXYC2_FULL_PER-ii_58_32_528	587922	588344	+	141	K05589	ftsB	cell division protein FtsB	seg	-	-	0.00024	17.5	55.6	141
RIFOXYC2_FULL_PER-ii_58_32_529	588341	588496	-	52	-	-	-	hypothetical protein	-	-	-	-	-	52
							tRNA (Met)
RIFOXYC2_FULL_PER-ii_58_32_530	588643	588927	+	95	K02899	RP-L27, MRPL27, rpmA	large subunit ribosomal protein L27	rpmA; 50S ribosomal protein L27; K02899 large subunit ribosomal protein L27	Ribosome	M00178	4.3e-34	114.3	20.7	95
RIFOXYC2_FULL_PER-ii_58_32_531	588996	589685	+	230	K02411	fliH	flagellar assembly protein FliH	hypothetical protein	Flagellar assembly	-	0.0055	12.3	55.2	230
RIFOXYC2_FULL_PER-ii_58_32_532	589701	590099	-	133	K01975	ligT	2'-5' RNA ligase [EC:6.5.1.-]	hypothetical protein	-	-	8.3e-13	44.6	32.6	133
RIFOXYC2_FULL_PER-ii_58_32_533	590354	592171	-	606	K03596	lepA	GTP-binding protein LepA	GTP-binding protein LepA; K03596 GTP-binding protein LepA	-	-	1.7e-252	835.1	83.4	606
RIFOXYC2_FULL_PER-ii_58_32_534	592262	596989	-	1576	K03599	sspA, mglA	RNA polymerase-associated protein	hypothetical protein	-	-	0.0086	11.4	47.5	1576
RIFOXYC2_FULL_PER-ii_58_32_535	596996	597610	-	205	K05740	DIAPH1	diaphanous 1	hypothetical protein	Focal adhesion Regulation of actin cytoskeleton	-	0.0002	15	829.9	205
RIFOXYC2_FULL_PER-ii_58_32_536	597610	598008	-	133	K04780	dhbF	nonribosomal peptide synthetase DhbF	hypothetical protein	Biosynthesis of siderophore group nonribosomal peptides	-	0.0014	11.5	547.2	133
RIFOXYC2_FULL_PER-ii_58_32_537	598005	599081	-	359	K16563	exoV	succinoglycan biosynthesis protein ExoV	polysaccharide pyruvyl transferase CsaB	-	-	6.1e-05	18.6	59.1	359
RIFOXYC2_FULL_PER-ii_58_32_538	599168	599620	-	151	K02884	RP-L19, MRPL19, rplS	large subunit ribosomal protein L19	rplS; 50S ribosomal protein L19; K02884 large subunit ribosomal protein L19	Ribosome	M00178	6.1e-39	129.7	19.3	151
RIFOXYC2_FULL_PER-ii_58_32_539	599708	600301	-	198	K03892	arsR	ArsR family transcriptional regulator	hypothetical protein	-	-	5.1e-06	22.6	17	198
RIFOXYC2_FULL_PER-ii_58_32_540	600558	602318	+	587	-	-	-	Glycogen phosphorylase	-	-	-	-	-	587
RIFOXYC2_FULL_PER-ii_58_32_541	602341	603618	+	426	K16137	nemR	TetR/AcrR family transcriptional regulator, transcriptional repressor for nem operon	hypothetical protein	-	-	0.003	13	85.3	426
RIFOXYC2_FULL_PER-ii_58_32_542	603545	605809	-	755	K02519	infB, MTIF2	translation initiation factor IF-2	Translation initiation factor 2	-	-	4e-229	759.1	16.6	755
RIFOXYC2_FULL_PER-ii_58_32_543	605879	607249	-	457	K06881	K06881	phosphoesterase RecJ domain-containing protein	exopolyphosphatase-like protein; K06881 phosphoesterase RecJ domain-containing protein	-	-	1.3e-89	297	34.3	457
RIFOXYC2_FULL_PER-ii_58_32_544	607431	608741	-	437	K00930	argB	acetylglutamate kinase [EC:2.7.2.8]	hypothetical protein	Arginine and proline metabolism	M00028	9.7e-23	76.9	78.2	437
							tRNA (Pro)
RIFOXYC2_FULL_PER-ii_58_32_545	609216	609482	+	89	K09167	K09167	hypothetical protein;	Uncharacterized protein	-	-	0.00078	15	88	89
RIFOXYC2_FULL_PER-ii_58_32_546	609712	610977	-	422	K01689	ENO, eno	enolase [EC:4.2.1.11]	eno; enolase (2-phosphoglycerate dehydratase) (EC:4.2.1.11); K01689 enolase [EC:4.2.1.11]	Glycolysis / Gluconeogenesis HIF-1 signaling pathway Methane metabolism RNA degradation	M00001; M00002; M00003; M00346; M00394	2.3e-198	656.3	44.2	422
RIFOXYC2_FULL_PER-ii_58_32_547	611083	611943	-	287	K02109	ATPF0B, atpF	F-type H+-transporting ATPase subunit b	hypothetical protein	Oxidative phosphorylation Photosynthesis	M00157	0.00017	17.4	39.5	287
RIFOXYC2_FULL_PER-ii_58_32_548	612134	612547	-	138	K19168	cptA	toxin CptA	hypothetical protein	-	-	0.00089	15.5	18.9	138
RIFOXYC2_FULL_PER-ii_58_32_549	612564	612914	-	117	K06131	cls	cardiolipin synthase [EC:2.7.8.-] - very weak domain hit	hypothetical protein	Glycerophospholipid metabolism	-	1.9e-06	23	295.8	117
RIFOXYC2_FULL_PER-ii_58_32_550	612930	613853	-	308	K13292	lgt, umpA	phosphatidylglycerol:prolipoprotein diacylglycerol transferase [EC:2.-.-.-]	prolipoprotein diacylglyceryl transferase; K13292 phosphatidylglycerol:prolipoprotein diacylglycerol transferase [EC:2.-.-.-]	-	-	4.1e-37	123.8	18.3	308
RIFOXYC2_FULL_PER-ii_58_32_551	613907	615727	-	607	K01868	TARS, thrS	threonyl-tRNA synthetase [EC:6.1.1.3]	thrS; threonyl-tRNA synthetase; K01868 threonyl-tRNA synthetase [EC:6.1.1.3]	Aminoacyl-tRNA biosynthesis	M00359; M00360	9.2e-235	777.6	62.5	607
RIFOXYC2_FULL_PER-ii_58_32_552	615906	616280	-	125	-	-	-	hypothetical protein	-	-	-	-	-	125
RIFOXYC2_FULL_PER-ii_58_32_553	616331	617752	-	474	K02313	dnaA	chromosomal replication initiator protein	dnaA; chromosome replication initiator DnaA; K02313 chromosomal replication initiator protein	Cell cycle - Caulobacter Two-component system	-	1.1e-148	492.3	45.6	474
RIFOXYC2_FULL_PER-ii_58_32_554	617769	618878	-	370	K11749	rseP	regulator of sigma E protease [EC:3.4.24.-]	membrane-associated zinc metalloprotease	Cell cycle - Caulobacter	-	2.5e-81	270.3	71.3	370
RIFOXYC2_FULL_PER-ii_58_32_555	618995	619771	-	259	K02242	comFC	competence protein ComFC	competence protein F	-	M00429	5e-24	81.4	59.1	259
RIFOXYC2_FULL_PER-ii_58_32_556	619909	621435	+	509	K01990	ABC-2.A	ABC-2 type transport system ATP-binding protein	hypothetical protein	-	M00254	0.0052	12	166.4	509
							tRNA (Val)
RIFOXYC2_FULL_PER-ii_58_32_557	621651	622406	+	252	K07090	K07090	COG: COG0730	hypothetical protein; K07090	-	-	2e-43	144.7	36.3	252
RIFOXYC2_FULL_PER-ii_58_32_558	622534	623001	+	156	K15977	K15977	putative oxidoreductase	Putative uncharacterized protein	-	-	0.0013	14.4	24.8	156
RIFOXYC2_FULL_PER-ii_58_32_559	623003	627556	+	1518	-	-	-	hypothetical protein	-	-	-	-	-	1518
RIFOXYC2_FULL_PER-ii_58_32_560	627605	628045	+	147	K01520	dut, DUT	dUTP pyrophosphatase [EC:3.6.1.23]	deoxyuridine 5'-triphosphate nucleotidohydrolase Dut; K01520 dUTP pyrophosphatase [EC:3.6.1.23]	Pyrimidine metabolism	M00053	1.2e-40	135.6	52.8	147
RIFOXYC2_FULL_PER-ii_58_32_561	628181	629431	-	417	K03531	ftsZ	cell division protein FtsZ	ftsZ; cell division protein FtsZ; K03531 cell division protein FtsZ	Cell cycle - Caulobacter	-	6e-160	529.8	60.4	417
RIFOXYC2_FULL_PER-ii_58_32_562	629471	630703	-	411	K03590	ftsA	cell division protein FtsA	cell division protein FtsA; K03590 cell division protein FtsA	Cell cycle - Caulobacter	-	3.9e-136	450.3	78.6	411
RIFOXYC2_FULL_PER-ii_58_32_563	630977	631900	-	308	K02335	DPO1, polA	DNA polymerase I [EC:2.7.7.7]	polA; DNA polymerase I (EC:2.7.7.7); K02335 DNA polymerase I [EC:2.7.7.7]	Base excision repair DNA replication Homologous recombination Nucleotide excision repair Purine metabolism Pyrimidine metabolism	-	3.7e-78	260.1	44.9	308
RIFOXYC2_FULL_PER-ii_58_32_564	632269	632898	+	210	K00703	E2.4.1.21, glgA	starch synthase [EC:2.4.1.21]	glgA1; glycogen synthase; K00703 starch synthase [EC:2.4.1.21]	Starch and sucrose metabolism	M00565	3.1e-26	87.8	79.4	210
RIFOXYC2_FULL_PER-ii_58_32_565	633007	634404	-	466	-	-	-	hypothetical protein	-	-	-	-	-	466
RIFOXYC2_FULL_PER-ii_58_32_566	634566	635114	-	183	K14150	GRA5	dense granule protein 5	hypothetical protein	-	-	0.0038	13.6	21.5	183
							tRNA (Lys)
RIFOXYC2_FULL_PER-ii_58_32_567	635536	636510	-	325	K03699	tlyC	putative hemolysin	protein of unknown function DUF21	-	-	9.1e-63	208.4	241.3	325
RIFOXYC2_FULL_PER-ii_58_32_568	636572	637432	-	287	K03177	truB, PUS4, TRUB1	tRNA pseudouridine55 synthase [EC:5.4.99.25]	truB; tRNA pseudouridine synthase B (EC:5.4.99.-); K03177 tRNA pseudouridine55 synthase [EC:5.4.99.25]	-	-	7.6e-85	281.7	33.3	287
RIFOXYC2_FULL_PER-ii_58_32_569	637513	638079	+	189	-	-	-	transmembrane_regions	-	-	-	-	-	189
RIFOXYC2_FULL_PER-ii_58_32_570	638269	638610	+	114	K05837	rodA, mrdB	rod shape determining protein RodA	conserved membrane protein of unknown function	-	-	1.6e-05	19.9	106.6	114
RIFOXYC2_FULL_PER-ii_58_32_571	638675	639193	-	173	-	-	-	hypothetical protein	-	-	-	-	-	173
RIFOXYC2_FULL_PER-ii_58_32_572	639242	640168	+	309	K00948	PRPS, prsA	ribose-phosphate pyrophosphokinase [EC:2.7.6.1]	ribose-phosphate pyrophosphokinase	Pentose phosphate pathway Purine metabolism	M00005	1.5e-118	393	52.5	309
							tRNA (Ile)
RIFOXYC2_FULL_PER-ii_58_32_573	640527	640790	+	88	K02401	flhB	flagellar biosynthetic protein FlhB	Uncharacterized protein	Flagellar assembly	-	0.0038	11.8	60.5	88
RIFOXYC2_FULL_PER-ii_58_32_574	641338	642891	-	518	-	-	-	hypothetical protein	-	-	-	-	-	518
RIFOXYC2_FULL_PER-ii_58_32_575	643021	643554	+	178	K01159	ruvC	crossover junction endodeoxyribonuclease RuvC [EC:3.1.22.4]	ruvC; crossover junction endodeoxyribonuclease RuvC; K01159 crossover junction endodeoxyribonuclease RuvC [EC:3.1.22.4]	Homologous recombination	-	1.1e-55	185.1	25.8	178
RIFOXYC2_FULL_PER-ii_58_32_576	643621	644745	-	375	K03629	recF	DNA replication and repair protein RecF	DNA replication and repair protein RecF; K03629 DNA replication and repair protein RecF	Homologous recombination	-	2.1e-89	296.1	72.7	375
RIFOXYC2_FULL_PER-ii_58_32_577	644752	645207	-	152	K08311	nudH	putative (di)nucleoside polyphosphate hydrolase [EC:3.6.1.-]	nudix family hydrolase, putative; K08311 putative (di)nucleoside polyphosphate hydrolase [EC:3.6.1.-]	RNA degradation	-	7.7e-27	90.2	63.5	152
RIFOXYC2_FULL_PER-ii_58_32_578	645323	645517	-	65	K02913	RP-L33, MRPL33, rpmG	large subunit ribosomal protein L33	hypothetical protein	Ribosome	M00178	0.00046	16.4	22.4	65
RIFOXYC2_FULL_PER-ii_58_32_579	645662	646576	-	305	K00384	trxB	thioredoxin reductase (NADPH) [EC:1.8.1.9]	thioredoxin reductase (EC:1.8.1.9); K00384 thioredoxin reductase (NADPH) [EC:1.8.1.9]	Pyrimidine metabolism Selenocompound metabolism	-	4.3e-100	331.5	34	305
RIFOXYC2_FULL_PER-ii_58_32_580	646715	647737	-	341	K01406	E3.4.24.40	serralysin [EC:3.4.24.40]	putative secreted calcium-binding protein	-	-	2.1e-10	36	66	341
RIFOXYC2_FULL_PER-ii_58_32_581	648015	648674	+	220	K07100	K07100	putative phosphoribosyl transferase	phosphoribosyl transferase domain-containing protein; K07100	-	-	3.2e-75	249.9	50.3	220
							tRNA (Leu)
RIFOXYC2_FULL_PER-ii_58_32_582	648877	649140	+	88	-	-	-	hypothetical protein	-	-	-	-	-	88
RIFOXYC2_FULL_PER-ii_58_32_583	649137	650606	+	490	K00566	mnmA, trmU, TRMU	tRNA-specific 2-thiouridylase [EC:2.8.1.-]	hypothetical protein	Sulfur relay system	-	0.00059	14.7	34.5	490
RIFOXYC2_FULL_PER-ii_58_32_584	650655	651995	+	447	K01925	murD	UDP-N-acetylmuramoylalanine--D-glutamate ligase [EC:6.3.2.9]	murD; UDP-N-acetylmuramoyl-L-alanyl-D-glutamate synthetase (EC:6.3.2.9); K01925 UDP-N-acetylmuramoylalanine--D-glutamate ligase [EC:6.3.2.9]	D-Glutamine and D-glutamate metabolism Peptidoglycan biosynthesis	-	2.8e-99	329.3	92.8	447
RIFOXYC2_FULL_PER-ii_58_32_585	652032	652331	+	100	K02462	gspM	general secretion pathway protein M	hypothetical protein	Bacterial secretion system	M00331	0.0043	13.2	31.6	100
RIFOXYC2_FULL_PER-ii_58_32_586	652316	652843	-	176	K03687	GRPE	molecular chaperone GrpE	Heat shock protein GrpE	-	-	4.4e-40	134	21.6	176
RIFOXYC2_FULL_PER-ii_58_32_587	652897	653946	+	350	K07301	yrbG	cation:H+ antiporter	CaCA family Na(+)/Ca(+) antiporter; K07301 inner membrane protein	-	-	2.6e-109	361.7	21.9	350
RIFOXYC2_FULL_PER-ii_58_32_588	653994	654176	-	61	K02016	ABC.FEV.S	iron complex transport system substrate-binding protein	hypothetical protein	ABC transporters	M00240	4.8e-05	18.3	104.1	61
RIFOXYC2_FULL_PER-ii_58_32_589	654321	654740	-	140	K02275	coxB	cytochrome c oxidase subunit II [EC:1.9.3.1]	cytochrome C oxidase subunit II; K02275 cytochrome c oxidase subunit II [EC:1.9.3.1]	Oxidative phosphorylation	M00155	6.4e-30	99.8	80.8	140
							tRNA (Met)
RIFOXYC2_FULL_PER-ii_58_32_590	655050	655781	+	244	K08680	menH	2-succinyl-6-hydroxy-2,4-cyclohexadiene-1-carboxylate synthase [EC:4.2.99.20]	alpha/beta hydrolase	Ubiquinone and other terpenoid-quinone biosynthesis	M00116	1.9e-19	66	131.1	244
RIFOXYC2_FULL_PER-ii_58_32_591	655856	657388	+	511	K01929	murF	UDP-N-acetylmuramoyl-tripeptide--D-alanyl-D-alanine ligase [EC:6.3.2.10]	MurF; UDP-N-acetylmuramyl pentapeptide synthase; K01929 UDP-N-acetylmuramoyl-tripeptide--D-alanyl-D-alanine ligase [EC:6.3.2.10]	Lysine biosynthesis Peptidoglycan biosynthesis	-	2.1e-77	257	122.9	511
RIFOXYC2_FULL_PER-ii_58_32_592	657413	658660	+	416	K13010	per, rfbE	perosamine synthetase [EC:2.6.1.102]	degt/dnrj/eryc1/strs aminotransferase	Amino sugar and nucleotide sugar metabolism	-	2.1e-46	154.5	333.9	416
RIFOXYC2_FULL_PER-ii_58_32_593	658680	659432	-	251	K00059	fabG	3-oxoacyl-[acyl-carrier protein] reductase [EC:1.1.1.100] CHECK	fabG; 3-oxoacyl-ACP reductase	Biosynthesis of unsaturated fatty acids Biotin metabolism Fatty acid biosynthesis	M00083; M00572	8.8e-75	248	28.7	251
RIFOXYC2_FULL_PER-ii_58_32_594	659518	660693	+	392	K12554	murN	alanine adding enzyme [EC:2.3.2.-]	hypothetical protein	Peptidoglycan biosynthesis	-	4.3e-23	77.9	173.1	392
RIFOXYC2_FULL_PER-ii_58_32_595	660724	661023	+	100	K03558	cvpA	membrane protein required for colicin V production	hypothetical protein	-	-	0.00097	15.2	20.7	100
RIFOXYC2_FULL_PER-ii_58_32_596	661111	662556	-	482	K01447	E3.5.1.28A, cwlA, xlyA, xlyB	N-acetylmuramoyl-L-alanine amidase [EC:3.5.1.28]	xylanase/chitin deacetylase	-	-	3e-12	41.7	291.5	482
RIFOXYC2_FULL_PER-ii_58_32_597	662602	664296	-	565	K01887	RARS, argS	arginyl-tRNA synthetase [EC:6.1.1.19]	arginyl-tRNA synthetase; K01887 arginyl-tRNA synthetase [EC:6.1.1.19]	Aminoacyl-tRNA biosynthesis	M00359; M00360	2.2e-161	534.2	45	565
RIFOXYC2_FULL_PER-ii_58_32_598	664609	665442	+	278	K03969	pspA	phage shock protein A	hypothetical protein	-	-	0.0008	14.8	167.4	278
RIFOXYC2_FULL_PER-ii_58_32_599	665500	667647	+	716	K12063	traC	conjugal transfer ATP-binding protein TraC	Type IV secretory pathway VirB4 components-like protein	-	-	7.8e-46	152.3	80.8	716
RIFOXYC2_FULL_PER-ii_58_32_600	667574	668578	-	335	K06881	K06881	phosphoesterase RecJ domain-containing protein	exopolyphosphatase-like protein; K06881 phosphoesterase RecJ domain-containing protein	-	-	7.6e-89	294.5	34.3	335
RIFOXYC2_FULL_PER-ii_58_32_601	668840	669133	-	98	K02834	rbfA	ribosome-binding factor A	hypothetical protein	-	-	7.3e-19	64.1	19.6	98
RIFOXYC2_FULL_PER-ii_58_32_602	669169	670068	+	300	K00604	MTFMT, fmt	methionyl-tRNA formyltransferase [EC:2.1.2.9]	methionyl-tRNA formyltransferase; K00604 methionyl-tRNA formyltransferase [EC:2.1.2.9]	Aminoacyl-tRNA biosynthesis One carbon pool by folate	-	7.8e-99	327.7	54.8	300
RIFOXYC2_FULL_PER-ii_58_32_603	670179	670463	-	95	K06447	astD	succinylglutamic semialdehyde dehydrogenase [EC:1.2.1.71] ->	hypothetical protein	Arginine and proline metabolism	-	0.00067	14.3	311.8	95
RIFOXYC2_FULL_PER-ii_58_32_604	670573	672090	-	506	K01874	MARS, metG	methionyl-tRNA synthetase [EC:6.1.1.10]	methionyl-tRNA synthetase; K01874 methionyl-tRNA synthetase [EC:6.1.1.10]	Aminoacyl-tRNA biosynthesis Selenocompound metabolism	M00359; M00360	4.7e-171	566.6	23.3	506
RIFOXYC2_FULL_PER-ii_58_32_605	672147	672497	-	117	K09089	HES4	hairy and enhancer of split 4	hypothetical protein	-	-	0.0081	11.8	301.8	117
RIFOXYC2_FULL_PER-ii_58_32_606	672494	673081	-	196	K16052	ynaI, mscMJ, MSL	MscS family membrane protein	hypothetical protein	-	-	0.0021	12.8	186.1	196
RIFOXYC2_FULL_PER-ii_58_32_607	673078	673473	-	132	-	-	-	hypothetical protein	-	-	-	-	-	132
RIFOXYC2_FULL_PER-ii_58_32_608	673701	673871	-	57	-	-	Overlaps tRNA?	hypothetical protein	-	-	-	-	-	57
							tRNA (Gly) 673803..673876
RIFOXYC2_FULL_PER-ii_58_32_609	673950	674354	+	135	K14673	whiEII	putative monooxygenase: Mannose-6-phosphate isomerase domain (5.3.1.8 ?); rmlC-like domain, cupin domain	mannose-6-phosphate isomerase	-	-	1.4e-09	33.5	57.2	135
RIFOXYC2_FULL_PER-ii_58_32_610	674386	674646	-	87	K07461	K07461	putative endonuclease	excinuclease ABC subunit C; K07461 putative endonuclease	-	-	3.6e-19	65.3	28.7	87
							tRNA (Gly)
RIFOXYC2_FULL_PER-ii_58_32_611	674912	675514	-	201	-	-	-	hypothetical protein	-	-	-	-	-	201
							tRNA (Arg)
RIFOXYC2_FULL_PER-ii_58_32_612	675677	676441	-	255	K03424	tatD	TatD DNase family protein [EC:3.1.21.-]	TatD family hydrolase; K03424 TatD DNase family protein [EC:3.1.21.-]	-	-	4.2e-90	299	52.8	255
RIFOXYC2_FULL_PER-ii_58_32_613	676520	676732	-	71	K09779	K09779	hypothetical protein	hypothetical protein; K09779 hypothetical protein	-	-	1.9e-13	46.2	24.1	71
RIFOXYC2_FULL_PER-ii_58_32_614	676864	677067	+	68	-	-	-	hypothetical protein	-	-	-	-	-	68
RIFOXYC2_FULL_PER-ii_58_32_615	677402	678577	+	392	K00786	E2.4.-.-		glycosyl transferase group 1	-	-	1.1e-48	162	488.2	392
RIFOXYC2_FULL_PER-ii_58_32_616	678819	679916	-	366	K03551	ruvB	holliday junction DNA helicase RuvB [EC:3.6.4.12]	ruvB; Holliday junction DNA helicase RuvB; K03551 holliday junction DNA helicase RuvB [EC:3.6.4.12]	Homologous recombination	-	4e-147	485.5	61.5	366
RIFOXYC2_FULL_PER-ii_58_32_617	680281	680715	+	240	K03832	tonB	periplasmic protein TonB	PARCEL domain-containing protein	-	-	5.4e-05	24.1	20.7	273
RIFOXYC2_FULL_PER-ii_58_32_618	680855	681277	+	141	K02867	RP-L11, MRPL11, rplK	large subunit ribosomal protein L11	rplK; 50S ribosomal protein L11; K02867 large subunit ribosomal protein L11	Ribosome	M00178; M00179	1.5e-60	201.7	28.8	141
RIFOXYC2_FULL_PER-ii_58_32_619	681409	682050	+	214	-	-	-	hypothetical protein	-	-	-	-	-	214
RIFOXYC2_FULL_PER-ii_58_32_620	682244	682945	+	234	K02863	RP-L1, MRPL1, rplA	large subunit ribosomal protein L1	rplA; ribosomal protein L1 (BL1)	Ribosome	M00178; M00179	5.6e-88	292	82.1	234
RIFOXYC2_FULL_PER-ii_58_32_621	682946	683929	-	328	K05540	dusB	tRNA-dihydrouridine synthase B [EC:1.-.-.-]	nifR3 family TIM-barrel protein	-	-	1.1e-83	277	111.9	328
RIFOXYC2_FULL_PER-ii_58_32_622	684020	684346	+	109	-	-	-	hypothetical protein	-	-	-	-	-	109
RIFOXYC2_FULL_PER-ii_58_32_623	684343	685611	+	423	K03548	perM	putative permease	hypothetical protein	-	-	5.5e-33	111	153.2	423
RIFOXYC2_FULL_PER-ii_58_32_624	685754	688363	+	870	K03696	clpC	ATP-dependent Clp protease ATP-binding subunit ClpC	ATPase AAA; K03696 ATP-dependent Clp protease ATP-binding subunit ClpC	-	-	2.1e-303	1005.3	52.8	870
RIFOXYC2_FULL_PER-ii_58_32_625	688506	689162	+	219	-	-	-	transmembrane_regions	-	-	-	-	-	219
RIFOXYC2_FULL_PER-ii_58_32_626	689159	689932	+	258	K12063	traC	conjugal transfer ATP-binding protein TraC	hypothetical protein	-	-	0.00011	16.2	80.8	258
RIFOXYC2_FULL_PER-ii_58_32_627	690183	691640	+	486	K02945	RP-S1, rpsA	small subunit ribosomal protein S1	rpfA; 30S ribosomal protein S1	Ribosome	M00178	3.5e-116	385.5	40.2	486
RIFOXYC2_FULL_PER-ii_58_32_628	691647	691985	-	113	K02503	HINT1, hinT, hit	histidine triad (HIT) family protein	bis(5'-nucleosyl)-tetraphosphatase (EC:3.6.1.17)	(ggKbase: purine metab)	-	6.3e-32	107.2	25	113
RIFOXYC2_FULL_PER-ii_58_32_629	692088	692579	+	164	K17934	NOXO1, SNX28	NADPH oxidase organizer 1	hypothetical protein	-	-	0.00066	14.4	123.6	164
RIFOXYC2_FULL_PER-ii_58_32_630	692701	692943	-	81	K02042	phnE	phosphonate transport system permease protein	hypothetical protein	ABC transporters	M00223	0.0017	13.9	66.7	81
RIFOXYC2_FULL_PER-ii_58_32_631	692988	693302	+	105	K08998	K08998	hypothetical protein	hypothetical protein	-	-	4.3e-20	68.8	17.7	105
RIFOXYC2_FULL_PER-ii_58_32_632	693650	694630	+	327	K07027	K07027	COG: COG0392;	hypothetical protein	-	-	2.8e-72	240.1	35	327
RIFOXYC2_FULL_PER-ii_58_32_633	694908	696212	+	435	K00058	serA, PHGDH	D-3-phosphoglycerate dehydrogenase [EC:1.1.1.95]	D-3-phosphoglycerate dehydrogenase (EC:1.1.1.95); K00058 D-3-phosphoglycerate dehydrogenase [EC:1.1.1.95]	Glycine, serine and threonine metabolism Methane metabolism	M00020	3.3e-63	209.8	64.1	435
RIFOXYC2_FULL_PER-ii_58_32_634	696257	698746	-	830	K19049	cslA	chondroitin AC lyase [EC:4.2.2.5]	secreted protein	-	-	8.4e-11	36	299.3	830
RIFOXYC2_FULL_PER-ii_58_32_635	698830	699375	+	182	K01823	idi, IDI	isopentenyl-diphosphate delta-isomerase [EC:5.3.3.2]	isopentenyl-diphosphate delta-isomerase (EC:5.3.3.2); K01823 isopentenyl-diphosphate delta-isomerase [EC:5.3.3.2]	Terpenoid backbone biosynthesis	M00095; M00096; M00364; M00365; M00366; M00367	1.1e-49	165.8	35.7	182
RIFOXYC2_FULL_PER-ii_58_32_636	699359	700039	+	227	K00806	uppS	undecaprenyl diphosphate synthase [EC:2.5.1.31]	undecaprenyl pyrophosphate synthetase (EC:2.5.1.31); K00806 undecaprenyl diphosphate synthase [EC:2.5.1.31]	Terpenoid backbone biosynthesis	-	1.4e-81	270	51.7	227
RIFOXYC2_FULL_PER-ii_58_32_637	700163	701074	+	304	K00869	E2.7.1.36, MVK, mvaK1	mevalonate kinase [EC:2.7.1.36]	hypothetical protein	Peroxisome Terpenoid backbone biosynthesis	M00095	1.6e-32	108.8	46.1	304
RIFOXYC2_FULL_PER-ii_58_32_638	701063	701923	-	287	K01101	E3.1.3.41	4-nitrophenyl phosphatase [EC:3.1.3.41]	HAD-superfamily hydrolase, subfamily IIA; K02566 NagD protein	Aminobenzoate degradation	-	1.1e-44	148.7	233.7	287
RIFOXYC2_FULL_PER-ii_58_32_639	701981	702991	+	337	K01597	MVD, mvaD	diphosphomevalonate decarboxylase [EC:4.1.1.33]	mvaD; diphosphomevalonate decarboxylase (EC:4.1.1.33); K01597 diphosphomevalonate decarboxylase [EC:4.1.1.33]	Terpenoid backbone biosynthesis	M00095	1.3e-79	264	35.3	337
RIFOXYC2_FULL_PER-ii_58_32_640	703252	704472	+	407	K00021	HMGCR	hydroxymethylglutaryl-CoA reductase (NADPH) [EC:1.1.1.34]	NADP-dependent hydroxymethylglutaryl-CoA reductase	AMPK signaling pathway Terpenoid backbone biosynthesis	M00095	1.1e-98	326.9	30.4	407
RIFOXYC2_FULL_PER-ii_58_32_641	704605	705645	+	347	K01641	E2.3.3.10	hydroxymethylglutaryl-CoA synthase [EC:2.3.3.10]	hydroxymethylglutaryl-CoA synthase	Butanoate metabolism Synthesis and degradation of ketone bodies Terpenoid backbone biosynthesis Valine, leucine and isoleucine degradation	M00088; M00095	2.6e-114	378.2	191.2	347
RIFOXYC2_FULL_PER-ii_58_32_642	705682	706797	+	372	K00626	E2.3.1.9, atoB	acetyl-CoA C-acetyltransferase [EC:2.3.1.9]	acetyl-CoA acetyltransferase	Benzoate degradation Butanoate metabolism Carbon fixation pathways in prokaryotes Fatty acid degradation Glyoxylate and dicarboxylate metabolism Lysine degradation Propanoate metabolism Pyruvate metabolism Synthesis and degradation of ketone bodies Terpenoid backbone biosynthesis Tryptophan metabolism Two-component system Valine, leucine and isoleucine degradation	M00088; M00095; M00373; M00374; M00375	1.9e-125	415.5	122.2	372
RIFOXYC2_FULL_PER-ii_58_32_643	706784	707719	+	312	K00942	E2.7.4.8, gmk	guanylate kinase [EC:2.7.4.8]	UPI0002114A10 related cluster	Purine metabolism	M00050	6.4e-31	103.7	60	312
RIFOXYC2_FULL_PER-ii_58_32_644	707859	709058	+	400	K16150	K16150	glycogen(starch) synthase [EC:2.4.1.11]	4-alpha-glucanotransferase (EC:2.4.1.25); K00705 4-alpha-glucanotransferase [EC:2.4.1.25]	Starch and sucrose metabolism	-	7.9e-67	221.8	221.2	400
RIFOXYC2_FULL_PER-ii_58_32_645	709077	709226	+	50	-	-	-	hypothetical protein	-	-	-	-	-	50
RIFOXYC2_FULL_PER-ii_58_32_646	709223	710515	+	431	K07405	E3.2.1.1A	alpha-amylase [EC:3.2.1.1]	amyA; alpha-amylase; K07405 alpha-amylase [EC:3.2.1.1]	Starch and sucrose metabolism	-	1.7e-158	524	290.5	431
RIFOXYC2_FULL_PER-ii_58_32_647	710539	712590	+	684	K01178	E3.2.1.3	glucoamylase [EC:3.2.1.3]	glycoside hydrolase 15-like protein	Starch and sucrose metabolism	-	6.1e-39	130	49.2	684
RIFOXYC2_FULL_PER-ii_58_32_648	712613	713452	+	280	K02409	fliF	flagellar M-ring protein FliF	hypothetical protein	Flagellar assembly	-	0.007	11.3	17.5	280
RIFOXYC2_FULL_PER-ii_58_32_649	713459	713608	+	50	-	-	-	hypothetical protein	-	-	-	-	-	50
RIFOXYC2_FULL_PER-ii_58_32_650	713605	714405	+	267	K01092	E3.1.3.25, IMPA, suhB	myo-inositol-1(or 4)-monophosphatase [EC:3.1.3.25]	suhB; myo-inositol-1(or 4)-monophosphatase (EC:3.1.3.25); K01092 myo-inositol-1(or 4)-monophosphatase [EC:3.1.3.25]	Inositol phosphate metabolism Phosphatidylinositol signaling system Streptomycin biosynthesis	M00131	3.8e-66	220	35.6	267
RIFOXYC2_FULL_PER-ii_58_32_651	714444	715034	-	197	K06287	maf	septum formation protein	Maf-like protein; K06287 septum formation protein	-	-	6.6e-57	188.8	18.1	197
RIFOXYC2_FULL_PER-ii_58_32_652	715114	715782	-	223	K11545	NSL1, MIS14, DC8	kinetochore-associated protein NSL1	hypothetical protein	-	-	0.0014	14.1	17.5	223
RIFOXYC2_FULL_PER-ii_58_32_653	715829	716785	-	319	K01867	WARS, trpS	tryptophanyl-tRNA synthetase [EC:6.1.1.2]	tryptophanyl-tRNA synthetase (EC:6.1.1.2); K01867 tryptophanyl-tRNA synthetase [EC:6.1.1.2]	Aminoacyl-tRNA biosynthesis	M00359; M00360	8.2e-125	413.4	81.3	319
RIFOXYC2_FULL_PER-ii_58_32_654	716925	717575	-	217	K06180	rluD	23S rRNA pseudouridine1911/1915/1917 synthase [EC:5.4.99.23]	RluA family pseudouridine synthase; K06179 23S rRNA pseudouridine955/2504/2580 synthase [EC:5.4.99.24]	-	-	5.2e-59	196.7	42.3	217
RIFOXYC2_FULL_PER-ii_58_32_655	717593	717841	-	83	-	-	-	hypothetical protein	-	-	-	-	-	83
RIFOXYC2_FULL_PER-ii_58_32_656	717933	719477	-	515	K01317	ACR	acrosin [EC:3.4.21.10] CHECK	hypothetical protein	-	-	4.1e-05	18.4	112	515
RIFOXYC2_FULL_PER-ii_58_32_657	719608	721851	-	748	K06915	K06915	COG: COG0433	hypothetical protein	-	-	3.8e-28	94.6	67.6	748
RIFOXYC2_FULL_PER-ii_58_32_658	721904	723598	-	565	K02331	POL5, MYBBP1A	DNA polymerase phi [EC:2.7.7.7]	seg	-	-	0.00043	14.3	43.4	565
RIFOXYC2_FULL_PER-ii_58_32_659	723684	725333	-	550	K02040	pstS	phosphate transport system substrate-binding protein	hypothetical protein	ABC transporters Two-component system	M00222	0.0023	12.9	18.8	550
RIFOXYC2_FULL_PER-ii_58_32_660	725490	726251	+	254	K07725	csa3	CRISPR-associated protein Csa3	transcriptional regulator TrmB	-	-	3e-05	19.8	34.1	254
RIFOXYC2_FULL_PER-ii_58_32_661	726298	728007	-	570	-	-	-	Glucocorticoid receptor-like (DNA-binding domain)	-	-	-	-	-	570
RIFOXYC2_FULL_PER-ii_58_32_662	728075	729766	-	564	K09377	CSRP	cysteine and glycine-rich protein	Glucocorticoid receptor-like (DNA-binding domain)	-	-	0.0011	14.2	69.6	564
RIFOXYC2_FULL_PER-ii_58_32_663	729884	730684	-	267	K03711	fur	Fur family transcriptional regulator, ferric uptake regulator	hypothetical protein	-	-	8.8e-06	21.3	34.3	267
RIFOXYC2_FULL_PER-ii_58_32_664	730728	732380	-	551	-	-	NOTE: C-rich, has one CxxCH motif; interpro: Zinc finger, GATA-type (transcription factor??)	id=5097604	-	-	-	-	-	551
RIFOXYC2_FULL_PER-ii_58_32_665	732501	734198	-	566	K03088	SIG3.2, rpoE	RNA polymerase sigma-70 factor, ECF subfamily	hypothetical protein	-	-	0.0018	14	36.1	566
RIFOXYC2_FULL_PER-ii_58_32_666	734202	735890	-	563	-	-	-	id=5093235	-	-	-	-	-	563
RIFOXYC2_FULL_PER-ii_58_32_667	735916	736452	-	179	K08259	lytM	lysostaphin [EC:3.4.24.75]	peptidase M23 family protein	-	-	3.3e-27	92.1	141.5	179
RIFOXYC2_FULL_PER-ii_58_32_668	736483	736911	-	143	K06191	nrdH	glutaredoxin-like protein NrdH	id=5087795	-	-	0.0066	12.5	69.8	143
RIFOXYC2_FULL_PER-ii_58_32_669	737062	738003	-	314	K07089	K07089	COG: COG0701	hypothetical protein; K07089	-	-	1.3e-121	401.7	21.2	314
RIFOXYC2_FULL_PER-ii_58_32_670	738148	738384	-	79	-	-	-	hypothetical protein	-	-	-	-	-	79
RIFOXYC2_FULL_PER-ii_58_32_671	739086	740417	+	444	-	-		hypothetical protein	-	-	-	-	-	444
RIFOXYC2_FULL_PER-ii_58_32_672	740488	740871	+	128	K03297	emrE, qac, mmr, smr	small multidrug resistance pump	Putative multidrug transporter EmrE	-	-	2.3e-13	46.6	29.3	128
RIFOXYC2_FULL_PER-ii_58_32_673	741150	741941	-	264	-	-	-	hypothetical protein	-	-	-	-	-	264
RIFOXYC2_FULL_PER-ii_58_32_674	742085	742672	-	196	K01494	dcd	dCTP deaminase [EC:3.5.4.13]	dcd; deoxycytidine triphosphate deaminase (EC:3.5.4.13); K01494 dCTP deaminase [EC:3.5.4.13]	Pyrimidine metabolism	M00053	4.5e-68	224.6	40.4	196
RIFOXYC2_FULL_PER-ii_58_32_675	742757	744505	+	583	K08503	SYP5	syntaxin of plants SYP5	hypothetical protein	SNARE interactions in vesicular transport	-	0.0063	12	76.9	583
RIFOXYC2_FULL_PER-ii_58_32_676	744651	746117	+	489	K02343	DPO3G, dnaX	DNA polymerase III subunit gamma/tau [EC:2.7.7.7]	dnaX; putative DNA polymerase III subunit gamma/tau (EC:2.7.7.7); K02343 DNA polymerase III subunit gamma/tau [EC:2.7.7.7]	DNA replication Homologous recombination Mismatch repair Purine metabolism Pyrimidine metabolism	M00260	1.9e-134	445.7	15.8	489
RIFOXYC2_FULL_PER-ii_58_32_677	746203	746784	+	194	K01934	MTHFS	5-formyltetrahydrofolate cyclo-ligase [EC:6.3.3.2]	5-formyltetrahydrofolate cyclo-ligase (EC:6.3.3.2); K01934 5-formyltetrahydrofolate cyclo-ligase [EC:6.3.3.2]	One carbon pool by folate	-	1.5e-46	155	18.6	194
RIFOXYC2_FULL_PER-ii_58_32_678	746868	748190	+	441	K00600	glyA, SHMT	glycine hydroxymethyltransferase [EC:2.1.2.1]	glyA; serine hydroxymethyltransferase; K00600 glycine hydroxymethyltransferase [EC:2.1.2.1]	Cyanoamino acid metabolism Glycine, serine and threonine metabolism Glyoxylate and dicarboxylate metabolism Methane metabolism One carbon pool by folate	M00140; M00141; M00346; M00532	1.6e-179	594.1	50.7	441
RIFOXYC2_FULL_PER-ii_58_32_679	748187	751372	-	1062	K07762	PAPPA	pappalysin-1 [EC:3.4.24.79]	hypothetical protein	-	-	3.3e-22	73.9	216.9	1062
RIFOXYC2_FULL_PER-ii_58_32_680	751485	752873	+	463	K03442	mscS	small conductance mechanosensitive channel	MscS mechanosensitive ion channel	-	-	2e-18	62.7	218.1	463
RIFOXYC2_FULL_PER-ii_58_32_681	753643	756327	-	895	K06915	K06915	COG: COG0433	hypothetical protein	-	-	1.3e-28	96.1	67.6	895
RIFOXYC2_FULL_PER-ii_58_32_682	756335	757045	-	237	K03705	hrcA	heat-inducible transcriptional repressor	hypothetical protein	-	-	5.4e-59	196.4	29.5	237
RIFOXYC2_FULL_PER-ii_58_32_683	757089	757313	-	75	K02909	RP-L31, rpmE	large subunit ribosomal protein L31	50S ribosomal protein L31; K02909 large subunit ribosomal protein L31	Ribosome	M00178	8.3e-26	86.6	16.5	75
RIFOXYC2_FULL_PER-ii_58_32_684	757415	760090	-	892	K02469	gyrA	DNA gyrase subunit A [EC:5.99.1.3]	gyrA; DNA gyrase subunit A (EC:5.99.1.3); K02469 DNA gyrase subunit A [EC:5.99.1.3]	-	-	0	1303	78.3	892
RIFOXYC2_FULL_PER-ii_58_32_685	760213	761490	-	426	-	-	-	hypothetical protein	-	-	-	-	-	426
RIFOXYC2_FULL_PER-ii_58_32_686	761552	762268	+	239	K07056	rsmI	16S rRNA (cytidine1402-2'-O)-methyltransferase [EC:2.1.1.198]	uroporphyrin-III C/tetrapyrrole methyltransferase; K07056 16S rRNA (cytidine1402-2'-O)-methyltransferase [EC:2.1.1.198]	-	-	3e-93	308.9	22.4	239
RIFOXYC2_FULL_PER-ii_58_32_687	762513	762794	-	94	K02053	ABC.SP.P	putative spermidine/putrescine transport system permease protein	hypothetical protein	-	M00193	0.00099	14.5	159.1	94
RIFOXYC2_FULL_PER-ii_58_32_688	762905	764119	-	405	K19304	mepM	murein DD-endopeptidase [EC:3.4.24.-]	peptidase M23	-	-	2.3e-25	85.5	130.4	405
RIFOXYC2_FULL_PER-ii_58_32_689	764419	764997	+	193	K03550	ruvA	holliday junction DNA helicase RuvA [EC:3.6.4.12]	ruvA; Holliday junction DNA helicase RuvA; K03550 holliday junction DNA helicase RuvA [EC:3.6.4.12]	Homologous recombination	-	3.5e-52	173.3	18	193
RIFOXYC2_FULL_PER-ii_58_32_690	765003	766289	+	429	K01810	GPI, pgi	glucose-6-phosphate isomerase [EC:5.3.1.9]	pgi; glucose-6-phosphate isomerase (EC:5.3.1.9); K01810 glucose-6-phosphate isomerase [EC:5.3.1.9]	Amino sugar and nucleotide sugar metabolism Glycolysis / Gluconeogenesis Pentose phosphate pathway Starch and sucrose metabolism	M00001; M00004; M00114	6.7e-113	374.1	56.9	429
RIFOXYC2_FULL_PER-ii_58_32_691	766396	766716	+	107	K03671	trxA	thioredoxin 1	trxA; thioredoxin; K03671 thioredoxin 1	-	-	3e-51	171.3	16.3	107
RIFOXYC2_FULL_PER-ii_58_32_692	766723	766980	+	86	K02029	ABC.PA.P	polar amino acid transport system permease protein	hypothetical protein	-	M00236	0.0036	13	183.8	86
RIFOXYC2_FULL_PER-ii_58_32_693	767476	768624	-	383	K06863	purP	5-formaminoimidazole-4-carboxamide-1-(beta)-D-ribofuranosyl 5'-monophosphate synthetase [EC:6.3.4.23]	5-formaminoimidazole-4-carboxamide-1-(beta)-D-ribofuranosyl 5'-monophosphate synthetase-like protein; K06863 5-formaminoimidazole-4-carboxamide-1-(beta)-D-ribofuranosyl 5'-monophosphate synthetase [EC:6.3.4.-]	Purine metabolism	M00048	9.4e-112	369.3	32	383
RIFOXYC2_FULL_PER-ii_58_32_694	768761	769816	-	352	K06863	purP	5-formaminoimidazole-4-carboxamide-1-(beta)-D-ribofuranosyl 5'-monophosphate synthetase [EC:6.3.4.23]	phosphoribosylaminoimidazolecarboxamide formyltransferase; K06863 5-formaminoimidazole-4-carboxamide-1-(beta)-D-ribofuranosyl 5'-monophosphate synthetase [EC:6.3.4.-]	Purine metabolism	M00048	1.7e-132	437.6	32	352
RIFOXYC2_FULL_PER-ii_58_32_695	769940	770257	+	106	-	-	-	hypothetical protein	-	-	-	-	-	106
RIFOXYC2_FULL_PER-ii_58_32_696	770319	771569	+	417	K06191	nrdH	glutaredoxin-like protein NrdH	glutaredoxin	-	-	4.8e-05	19.6	39.2	417
RIFOXYC2_FULL_PER-ii_58_32_697	771666	772664	+	333	K00721	DPM1	dolichol-phosphate mannosyltransferase [EC:2.4.1.83]	glycosyl transferase family 2 protein; K00721 dolichol-phosphate mannosyltransferase [EC:2.4.1.83]	N-Glycan biosynthesis	-	2.5e-91	302.6	62.8	333
RIFOXYC2_FULL_PER-ii_58_32_698	773023	773595	-	191	-	-	-	hypothetical protein	-	-	-	-	-	191
RIFOXYC2_FULL_PER-ii_58_32_699	773856	776261	+	802	K13735	yeeJ	adhesin/invasin	FG-GAP repeat-containing protein	-	-	8.9e-14	45.8	76.6	802
RIFOXYC2_FULL_PER-ii_58_32_700	776347	777324	+	326	K00852	rbsK, RBKS	ribokinase [EC:2.7.1.15]	carbohydrate kinase PfkB; K00852 ribokinase [EC:2.7.1.15]	Pentose phosphate pathway	-	3.7e-55	183.6	147.5	326
RIFOXYC2_FULL_PER-ii_58_32_701	777346	777951	+	202	K03589	ftsQ	cell division protein FtsQ	hypothetical protein	Cell cycle - Caulobacter	-	0.00044	15.4	18.5	202
RIFOXYC2_FULL_PER-ii_58_32_702	778108	779424	+	439	K09667	OGT	protein O-GlcNAc transferase [EC:2.4.1.255]	tetratricopeptide domain-containing protein	Other types of O-glycan biosynthesis	-	2.9e-11	37.4	269.8	439
RIFOXYC2_FULL_PER-ii_58_32_703	779538	781214	+	559	K00960	E2.7.7.6	DNA-directed RNA polymerase [EC:2.7.7.6]: C rich with many CxxC and one CxxCH	Uncharacterized protein	-	-	0.0014	14.9	23.1	559
RIFOXYC2_FULL_PER-ii_58_32_704	782055	783464	+	470	-	-		hypothetical protein	-	-	-	-	-	470
RIFOXYC2_FULL_PER-ii_58_32_705	783612	784514	+	301	K03074	secF	preprotein translocase subunit SecF	protein-export membrane protein, SecD/SecF family	Bacterial secretion system Protein export	M00335	2e-82	273.2	213.1	301
RIFOXYC2_FULL_PER-ii_58_32_706	784534	785811	+	426	K03545	tig	trigger factor	trigger factor	-	-	4.8e-96	318.7	92.5	426
RIFOXYC2_FULL_PER-ii_58_32_707	785932	787824	-	631	K00951	relA	GTP pyrophosphokinase [EC:2.7.6.5]	relA; GTP pyrophosphokinase (EC:2.7.6.5); K00951 GTP pyrophosphokinase [EC:2.7.6.5]	Purine metabolism	-	3.4e-168	557.6	62.7	631
RIFOXYC2_FULL_PER-ii_58_32_708	787945	788388	-	148	K07560	dtd, DTD1	D-tyrosyl-tRNA(Tyr) deacylase [EC:3.1.-.-]	D-tyrosyl-tRNA(Tyr) deacylase; K07560 D-tyrosyl-tRNA(Tyr) deacylase [EC:3.1.-.-]	-	-	1.6e-64	214.3	55.7	148
RIFOXYC2_FULL_PER-ii_58_32_709	788455	789642	-	396	-	-	-	hypothetical protein	-	-	-	-	-	396
RIFOXYC2_FULL_PER-ii_58_32_710	789954	790523	+	190	K02864	RP-L10, MRPL10, rplJ	large subunit ribosomal protein L10	50S ribosomal protein L10; K02864 large subunit ribosomal protein L10	Ribosome	M00178; M00179	1e-46	155.3	55.8	190
RIFOXYC2_FULL_PER-ii_58_32_711	790589	790993	+	135	K02935	RP-L7, MRPL12, rplL	large subunit ribosomal protein L7/L12	rplL; 50S ribosomal protein L7/L12; K02935 large subunit ribosomal protein L7/L12	Ribosome	M00178	6.2e-44	146.7	21.4	135
RIFOXYC2_FULL_PER-ii_58_32_712	791065	791820	+	252	K10532	HGSNAT	heparan-alpha-glucosaminide N-acetyltransferase [EC:2.3.1.78]	hypothetical protein	Glycosaminoglycan degradation Lysosome	M00078	4.1e-06	21.6	39.9	252
RIFOXYC2_FULL_PER-ii_58_32_713	791956	793506	+	517	K02676	pilZ	type IV pilus assembly protein PilZ	cell envelope-related transcriptional attenuator	-	-	0.00059	15.9	17.6	517
RIFOXYC2_FULL_PER-ii_58_32_714	793503	794405	+	301	-	-		Uncharacterized protein	-	-	-	-	-	301
RIFOXYC2_FULL_PER-ii_58_32_715	794910	796091	+	394	K08153	blt, norA	MFS transporter, DHA1 family, multidrug resistance protein	major facilitator superfamily permease	-	M00717	2.2e-12	42.5	252.8	394
RIFOXYC2_FULL_PER-ii_58_32_716	796088	796888	-	267	K06976	K06976	COG: COG3393	GCN5-like N-acetyltransferase	-	-	1.4e-31	106.2	51.4	267
RIFOXYC2_FULL_PER-ii_58_32_717	797090	797458	+	123	-	-	-	hypothetical protein	-	-	-	-	-	123
RIFOXYC2_FULL_PER-ii_58_32_718	797614	798219	+	202	K01356	lexA	repressor LexA [EC:3.4.21.88]	DNA polymerase V subunit; K03503 DNA polymerase V [EC:3.4.21.-]	-	M00729	5.9e-55	183	29.3	202
RIFOXYC2_FULL_PER-ii_58_32_719	798271	801072	-	934	K01873	VARS, valS	valyl-tRNA synthetase [EC:6.1.1.9]	valyl-tRNA synthetase (EC:6.1.1.9); K01873 valyl-tRNA synthetase [EC:6.1.1.9]	Aminoacyl-tRNA biosynthesis	M00359; M00360	3e-304	1008.2	58.7	934
RIFOXYC2_FULL_PER-ii_58_32_720	801268	801378	+	37	-	-	-	hypothetical protein	-	-	-	-	-	37
RIFOXYC2_FULL_PER-ii_58_32_721	801849	802259	+	137	-	-		hypothetical protein	-	-	-	-	-	137
RIFOXYC2_FULL_PER-ii_58_32_722	802266	802400	+	45	K11619	liaI	lia operon protein LiaI	hypothetical protein	Two-component system	M00754	0.0018	14.3	24.2	45
RIFOXYC2_FULL_PER-ii_58_32_723	802517	802846	+	110	-	-	-	hypothetical protein	-	-	-	-	-	110
RIFOXYC2_FULL_PER-ii_58_32_724	802925	803785	+	287	K10716	kch, trkA, mthK, pch	voltage-gated potassium channel	Ion transport 2 domain protein	-	-	7.3e-14	48.1	17.9	287
RIFOXYC2_FULL_PER-ii_58_32_725	803828	806080	-	751	K00962	pnp, PNPT1	polyribonucleotide nucleotidyltransferase [EC:2.7.7.8]	polynucleotide phosphorylase; K00962 polyribonucleotide nucleotidyltransferase [EC:2.7.7.8]	Purine metabolism Pyrimidine metabolism RNA degradation	M00394	3.4e-264	874.9	48.2	751
RIFOXYC2_FULL_PER-ii_58_32_726	806373	806660	-	96	-	-	-	hypothetical protein	-	-	-	-	-	96
RIFOXYC2_FULL_PER-ii_58_32_727	806775	807197	-	141	-	-	-	hypothetical protein	-	-	-	-	-	141
RIFOXYC2_FULL_PER-ii_58_32_728	807514	807828	-	105	K03720	trpR	TrpR family transcriptional regulator, trp operon repressor	hypothetical protein	-	-	3.3e-25	84	32	105
RIFOXYC2_FULL_PER-ii_58_32_729	807850	808119	-	90	K02956	RP-S15, MRPS15, rpsO	small subunit ribosomal protein S15	30S ribosomal protein S15; K02956 small subunit ribosomal protein S15	Ribosome	M00178; M00179	1.6e-31	106.2	18.7	90
RIFOXYC2_FULL_PER-ii_58_32_730	808378	809505	+	376	K09760	rmuC	DNA recombination protein RmuC	hypothetical protein; K09760 DNA recombination protein RmuC	-	-	7.1e-53	176.2	25.9	376
RIFOXYC2_FULL_PER-ii_58_32_731	809739	809957	+	73	-	-		hypothetical protein	-	-	-	-	-	73
RIFOXYC2_FULL_PER-ii_58_32_732	810126	810419	+	98	-	-	-	hypothetical protein	-	-	-	-	-	98
RIFOXYC2_FULL_PER-ii_58_32_733	810416	812704	+	763	K03657	uvrD, pcrA	DNA helicase II / ATP-dependent DNA helicase PcrA [EC:3.6.4.12]	ATP-dependent DNA helicase PcrA; K03657 DNA helicase II / ATP-dependent DNA helicase PcrA [EC:3.6.4.12]	Mismatch repair Nucleotide excision repair	-	1.8e-257	853.4	86.7	763
RIFOXYC2_FULL_PER-ii_58_32_734	812711	814378	-	556	K05988	dexA	dextranase [EC:3.2.1.11]	hypothetical protein	-	-	8.8e-09	30	174.7	556
RIFOXYC2_FULL_PER-ii_58_32_735	814423	815217	-	265	K00931	proB	glutamate 5-kinase [EC:2.7.2.11]	gamma-glutamyl kinase (EC:2.7.2.11); K00931 glutamate 5-kinase [EC:2.7.2.11]	Arginine and proline metabolism Carbapenem biosynthesis	M00015	3.1e-52	173.9	219.4	265
RIFOXYC2_FULL_PER-ii_58_32_736	815417	816487	-	357	K01626	E2.5.1.54, aroF, aroG, aroH	3-deoxy-7-phosphoheptulonate synthase [EC:2.5.1.54]	2-keto-3-deoxy-D-arabino-heptulosonate-7-phosphate synthase I alpha	Phenylalanine, tyrosine and tryptophan biosynthesis	M00022	1.2e-91	303.1	30.9	357
RIFOXYC2_FULL_PER-ii_58_32_737	816519	816830	-	104	-	-	-	hypothetical protein	-	-	-	-	-	104
RIFOXYC2_FULL_PER-ii_58_32_738	817550	818365	+	272	K02528	ksgA	16S rRNA (adenine1518-N6/adenine1519-N6)-dimethyltransferase [EC:2.1.1.182]	dimethyladenosine transferase (EC:2.1.1.48); K02528 16S rRNA (adenine1518-N6/adenine1519-N6)-dimethyltransferase [EC:2.1.1.182]	-	-	1.2e-81	270.1	59.2	272
RIFOXYC2_FULL_PER-ii_58_32_739	818362	819957	+	532	K02238	comEC	competence protein ComEC	ComEC/Rec2-like protein; K02238 competence protein ComEC	-	M00429	3.3e-77	256.5	40.8	532
RIFOXYC2_FULL_PER-ii_58_32_740	820052	821338	-	429	K01945	purD	phosphoribosylamine--glycine ligase [EC:6.3.4.13]	phosphoribosylglycinamide synthetase, ATP-grasp (a) domain protein; K01945 phosphoribosylamine--glycine ligase [EC:6.3.4.13]	Purine metabolism	M00048	1.9e-191	632.5	348.4	429
RIFOXYC2_FULL_PER-ii_58_32_741	821474	822598	+	375	-	-	-	hypothetical protein	-	-	-	-	-	375
RIFOXYC2_FULL_PER-ii_58_32_742	822721	824511	+	597	K09667	OGT	protein O-GlcNAc transferase [EC:2.4.1.255]	hypothetical protein	Other types of O-glycan biosynthesis	-	6.2e-21	69.4	269.8	597
RIFOXYC2_FULL_PER-ii_58_32_743	824785	825963	+	393	K06969	rlmI	23S rRNA (cytosine1962-C5)-methyltransferase [EC:2.1.1.191]	rlmI; ribosomal RNA large subunit methyltransferase I; K06969 23S rRNA (cytosine1962-C5)-methyltransferase [EC:2.1.1.191]	-	-	1.2e-126	419	109.7	393
RIFOXYC2_FULL_PER-ii_58_32_744	825930	826208	-	93	K07461	K07461	putative endonuclease	yazA; endonuclease; K07461 putative endonuclease	-	-	1.4e-31	106.1	28.7	93
RIFOXYC2_FULL_PER-ii_58_32_745	826317	826670	-	118	-	-		hypothetical protein	-	-	-	-	-	118
RIFOXYC2_FULL_PER-ii_58_32_746	826793	827167	+	125	K07732	rfk	riboflavin kinase, archaea type [EC:2.7.1.161]	HxlR family transcriptional regulator	Riboflavin metabolism	-	0.00045	15.7	85.2	125
RIFOXYC2_FULL_PER-ii_58_32_747	827700	828086	+	129	K08115	CSPG4	chondroitin sulfate proteoglycan 4	hypothetical protein	-	-	0.00063	12.4	249.2	129
RIFOXYC2_FULL_PER-ii_58_32_748	828423	829274	-	284	K02823	pyrDII	dihydroorotate dehydrogenase electron transfer subunit	dihydroorotate dehydrogenase electron transfer subunit (EC:1.3.5.2); K02823 dihydroorotate dehydrogenase electron transfer subunit	Pyrimidine metabolism	-	1.5e-68	227.5	44.3	284
RIFOXYC2_FULL_PER-ii_58_32_749	829271	830215	-	315	K17828	pyrDI	dihydroorotate dehydrogenase (NAD+) catalytic subunit [EC:1.3.1.14]	pyrD; dihydroorotate dehydrogenase; K00226 dihydroorotate dehydrogenase (fumarate) [EC:1.3.98.1]	Pyrimidine metabolism	M00051	7.9e-102	337	67.4	315
RIFOXYC2_FULL_PER-ii_58_32_750	830278	830931	-	218	K09125	K09125	hypothetical protein	hypothetical protein; K09125 hypothetical protein	-	-	4.6e-56	186.3	22.8	218
RIFOXYC2_FULL_PER-ii_58_32_751	830970	832616	-	549	K01937	pyrG, CTPS	CTP synthase [EC:6.3.4.2]	pyrG; CTP synthetase (EC:6.3.4.2); K01937 CTP synthase [EC:6.3.4.2]	Pyrimidine metabolism	M00052	2.8e-236	782.9	44.5	549
RIFOXYC2_FULL_PER-ii_58_32_752	832788	833771	+	328	K06966	K06966	COG: COG1611	hypothetical protein; K06966	-	-	2.7e-35	118.7	24.2	328
RIFOXYC2_FULL_PER-ii_58_32_753	833823	834275	-	151	-	-	-	hypothetical protein	-	-	-	-	-	151
RIFOXYC2_FULL_PER-ii_58_32_754	834385	834837	-	151	K02109	ATPF0B, atpF	F-type H+-transporting ATPase subunit b	hypothetical protein	Oxidative phosphorylation Photosynthesis	M00157	0.00023	17.2	35.6	151
RIFOXYC2_FULL_PER-ii_58_32_755	834896	836158	-	421	K01881	PARS, proS	prolyl-tRNA synthetase [EC:6.1.1.15]	proS; prolyl-tRNA synthetase (EC:6.1.1.15)	Aminoacyl-tRNA biosynthesis	M00359; M00360	1.1e-138	459.3	17.3	421
RIFOXYC2_FULL_PER-ii_58_32_756	836235	836657	-	141	K09775	K09775	hypothetical protein	hypothetical protein	-	-	2.1e-35	117.9	34.7	141
RIFOXYC2_FULL_PER-ii_58_32_757	836771	837610	-	280	K07465	K07465	putative RecB family exonuclease	ATP-dependent DNA helicase	-	-	4.7e-25	84.3	136.7	280
RIFOXYC2_FULL_PER-ii_58_32_758	837653	843250	-	1866	K10866	RAD50	DNA repair protein RAD50 [EC:3.6.-.-]	hypothetical protein	Homologous recombination Non-homologous end-joining	M00291; M00292; M00295	0.00017	15.1	147.8	1866
RIFOXYC2_FULL_PER-ii_58_32_759	843260	843466	-	69	-	-	-	hypothetical protein	-	-	-	-	-	69
RIFOXYC2_FULL_PER-ii_58_32_760	843475	844788	-	438	-	-	-	hypothetical protein	-	-	-	-	-	438
RIFOXYC2_FULL_PER-ii_58_32_761	844808	845947	-	380	-	-	-	hypothetical protein	-	-	-	-	-	380
RIFOXYC2_FULL_PER-ii_58_32_762	846093	846431	+	113	K05808	yhbH	putative sigma-54 modulation protein	sigma 54 modulation protein/ribosomal protein S30EA	-	-	1.1e-14	50.6	35.5	113
RIFOXYC2_FULL_PER-ii_58_32_763	846575	847609	-	345	-	-	-	conserved exported protein of unknown function	-	-	-	-	-	345
RIFOXYC2_FULL_PER-ii_58_32_764	847627	848334	-	236	K02897	RP-L25, rplY	large subunit ribosomal protein L25	rplY; 50S ribosomal protein L25	Ribosome	M00178	1.2e-53	178.2	17.6	236
RIFOXYC2_FULL_PER-ii_58_32_765	848535	849449	-	305	K07011	K07011	COG: COG1216	glycosyl transferase family protein; K07011	-	-	3.5e-61	203.5	33.4	305
RIFOXYC2_FULL_PER-ii_58_32_766	849561	851975	+	805	K03703	uvrC	excinuclease ABC subunit C	uvrC; excinuclease ABC subunit C; K03703 excinuclease ABC subunit C	Nucleotide excision repair	-	8e-202	668.4	50	805
RIFOXYC2_FULL_PER-ii_58_32_767	852053	852607	-	185	K01992	ABC-2.P	ABC-2 type transport system permease protein	hypothetical protein	-	M00254	0.002	13.6	27.7	185
RIFOXYC2_FULL_PER-ii_58_32_768	852664	853887	-	408	-	-		hypothetical protein	-	-	-	-	-	408
RIFOXYC2_FULL_PER-ii_58_32_769	854517	855191	+	225	K01420	fnr	CRP/FNR family transcriptional regulator, anaerobic regulatory protein	hypothetical protein	-	-	5.7e-22	74.1	149.1	225
RIFOXYC2_FULL_PER-ii_58_32_770	855276	855422	+	49	-	-	-	hypothetical protein	-	-	-	-	-	49
RIFOXYC2_FULL_PER-ii_58_32_771	855539	856150	+	204	K11903	K11903	type VI secretion system secreted protein Hcp	hemolysin-coregulated protein	Bacterial secretion system	M00334	3.1e-48	159.7	44.9	204
RIFOXYC2_FULL_PER-ii_58_32_772	856433	856600	+	56	K07301	yrbG	cation:H+ antiporter	hypothetical protein	-	-	2.3e-07	25.8	21.9	56
RIFOXYC2_FULL_PER-ii_58_32_773	856620	856841	-	74	K09937	K09937	hypothetical protein	hypothetical protein	-	-	0.0055	13	45.4	74
RIFOXYC2_FULL_PER-ii_58_32_774	856989	858032	-	348	K03548	perM	putative permease	hypothetical protein	-	-	2.4e-13	46.4	153.2	348
							tRNA (Glu)
RIFOXYC2_FULL_PER-ii_58_32_775	858499	858717	-	73	K09637	TMPRSS6	transmembrane protease, serine 6 [EC:3.4.21.-]	mev:Metev_1924 quinoprotein glucose dehydrogenase (EC:1.1.5.2)		-	0.00094	13.3	331	73
RIFOXYC2_FULL_PER-ii_58_32_776	858775	860862	-	696	K09181	yfiQ	acetyltransferase	acetyl coenzyme A synthetase subunit alpha	-	-	3.5e-243	804.9	662.6	696
RIFOXYC2_FULL_PER-ii_58_32_777	860819	861058	-	80	-	-	-	hypothetical protein	-	-	-	-	-	80
RIFOXYC2_FULL_PER-ii_58_32_778	861173	861934	+	254	K00059	fabG	3-oxoacyl-[acyl-carrier protein] reductase [EC:1.1.1.100]	short-chain dehydrogenase/reductase SDR; K00059 3-oxoacyl-[acyl-carrier protein] reductase [EC:1.1.1.100]	Biosynthesis of unsaturated fatty acids Biotin metabolism Fatty acid biosynthesis	M00083; M00572	1.7e-98	326	28.7	254
RIFOXYC2_FULL_PER-ii_58_32_779	861934	864618	+	895	K01537	E3.6.3.8	Ca2+-transporting ATPase [EC:3.6.3.8]	pacL; Cation-transporting ATPase pacL (EC:3.6.3.-)	-	-	0	1169.4	86.7	895
RIFOXYC2_FULL_PER-ii_58_32_780	864620	865087	-	156	K00783	rlmH	23S rRNA (pseudouridine1915-N3)-methyltransferase [EC:2.1.1.177]	hypothetical protein; K00783 23S rRNA (pseudouridine1915-N3)-methyltransferase [EC:2.1.1.177]	-	-	6.4e-48	159	25.7	156
RIFOXYC2_FULL_PER-ii_58_32_781	865405	866946	-	514	K03215	rumA (see note)	23S rRNA (uracil1939-C5)-methyltransferase [EC:2.1.1.190]	rumA; 23S rRNA mehtyltransferase RumA (EC:2.1.1.-)	-	-	7.2e-141	467.2	56.5	514
RIFOXYC2_FULL_PER-ii_58_32_782	866989	867936	+	316	-	-	-	Putative uncharacterized protein	-	-	-	-	-	316
RIFOXYC2_FULL_PER-ii_58_32_783	867959	868768	+	270	K03606	wcaJ	putative colanic acid biosysnthesis UDP-glucose lipid carrier transferase	hypothetical protein	-	-	8.7e-15	50.6	60.6	270
RIFOXYC2_FULL_PER-ii_58_32_784	868898	869854	+	319	K00973	E2.7.7.24, rfbA, rffH	glucose-1-phosphate thymidylyltransferase [EC:2.7.7.24] : rfbA, rffH <-	glucose-1-phosphate thymidylyltransferase	Polyketide sugar unit biosynthesis Streptomycin biosynthesis	-	1.2e-38	128.9	18.9	319
RIFOXYC2_FULL_PER-ii_58_32_785	869906	870565	+	220	K03072	secD	preprotein translocase subunit SecD	hypothetical protein	Bacterial secretion system Protein export	M00335	4.2e-05	18.2	66.8	220
RIFOXYC2_FULL_PER-ii_58_32_786	870594	873032	+	813	K03072	secD	preprotein translocase subunit SecD	protein-export membrane protein SecD; K03072 preprotein translocase subunit SecD	Bacterial secretion system Protein export	M00335	4.5e-118	391.3	66.8	813
RIFOXYC2_FULL_PER-ii_58_32_787	873045	873860	-	272	K01087	otsB	trehalose 6-phosphate phosphatase [EC:3.1.3.12]	HAD family hydrolase; K01087 trehalose 6-phosphate phosphatase [EC:3.1.3.12]	Starch and sucrose metabolism	-	1.7e-54	181.4	59.2	272
RIFOXYC2_FULL_PER-ii_58_32_788	873926	876133	-	736	K00697	otsA	trehalose 6-phosphate synthase [EC:2.4.1.15]	otsA1; alpha,alpha-trehalose-phosphate synthase (EC:2.4.1.15); K00697 trehalose 6-phosphate synthase [EC:2.4.1.15]	Starch and sucrose metabolism	-	4.7e-269	889.9	455.9	736
RIFOXYC2_FULL_PER-ii_58_32_789	876362	878158	+	599	K01087	otsB	trehalose 6-phosphate phosphatase [EC:3.1.3.12]	glycoside hydrolase 15-like protein	Starch and sucrose metabolism	-	2.3e-45	151.2	59.2	599
RIFOXYC2_FULL_PER-ii_58_32_790	878162	878398	-	79	K07039	K07039	uncharacterized protein	SecC motif-containing protein; K09858 SEC-C motif domain protein	-	-	5.3e-18	61.3	43.2	79
RIFOXYC2_FULL_PER-ii_58_32_791	878786	879427	-	214	-	-	-	hypothetical protein	-	-	-	-	-	214
RIFOXYC2_FULL_PER-ii_58_32_792	879537	880061	-	175	K00287	folA	dihydrofolate reductase [EC:1.5.1.3]	dihydrofolate reductase (EC:1.5.1.3); K00287 dihydrofolate reductase [EC:1.5.1.3]	Folate biosynthesis One carbon pool by folate	M00126	3.9e-66	219.5	18.8	175
RIFOXYC2_FULL_PER-ii_58_32_793	880122	880940	-	273	K00560	thyA, TYMS	thymidylate synthase [EC:2.1.1.45]	thyA; Thymidylate synthase (EC:2.1.1.45); K00560 thymidylate synthase [EC:2.1.1.45]	One carbon pool by folate Pyrimidine metabolism	M00053	2.1e-149	494.6	40.6	273
RIFOXYC2_FULL_PER-ii_58_32_794	880973	881722	-	250	-	-	-	transcriptional regulator TrmB	-	-	-	-	-	250
RIFOXYC2_FULL_PER-ii_58_32_795	882000	882674	-	225	K10773	NTH	endonuclease III [EC:4.2.99.18]	DNA-(apurinic or apyrimidinic site) lyase/endonuclease III; K10773 endonuclease III [EC:4.2.99.18]	Base excision repair	-	5e-89	294.8	34.9	225
RIFOXYC2_FULL_PER-ii_58_32_796	882753	883328	+	192	K02342	DPO3E, dnaQ	DNA polymerase III subunit epsilon [EC:2.7.7.7]	DNA polymerase III subunit epsilon; K02342 DNA polymerase III subunit epsilon [EC:2.7.7.7]	DNA replication Homologous recombination Mismatch repair Purine metabolism Pyrimidine metabolism	M00260	5e-67	223.3	17.4	192
RIFOXYC2_FULL_PER-ii_58_32_797	883426	883875	+	150	K01462	PDF, def	peptide deformylase [EC:3.5.1.88]	peptide deformylase (EC:3.5.1.88); K01462 peptide deformylase [EC:3.5.1.88]	-	-	1.2e-51	172.2	156.7	150
RIFOXYC2_FULL_PER-ii_58_32_798	883946	885391	+	482	K02434	gatB, PET112	aspartyl-tRNA(Asn)/glutamyl-tRNA(Gln) amidotransferase subunit B [EC:6.3.5.6 6.3.5.7]	gatB; aspartyl/glutamyl-tRNA amidotransferase subunit B (EC:6.3.5.-); K02434 aspartyl-tRNA(Asn)/glutamyl-tRNA (Gln) amidotransferase subunit B [EC:6.3.5.6 6.3.5.7]	Aminoacyl-tRNA biosynthesis	-	4.5e-183	606.8	29.2	482
RIFOXYC2_FULL_PER-ii_58_32_799	885447	886604	+	386	K04517	tyrA2	prephenate dehydrogenase [EC:1.3.1.12]	hypothetical protein	Novobiocin biosynthesis Phenylalanine, tyrosine and tryptophan biosynthesis	M00025	1.3e-15	53.2	45.8	386
RIFOXYC2_FULL_PER-ii_58_32_800	886715	887272	-	186	K02356	efp	elongation factor P	elongation factor P; K02356 elongation factor P	-	-	1.2e-68	226.9	62	186
RIFOXYC2_FULL_PER-ii_58_32_801	887292	887384	+	31	-	-	-	coiled-coil 11..32	-	-	-	-	-	31
RIFOXYC2_FULL_PER-ii_58_32_802	887446	889368	-	641	-	-	-	hypothetical protein	-	-	-	-	-	641
RIFOXYC2_FULL_PER-ii_58_32_803	889497	890054	-	186	K03088	SIG3.2, rpoE	RNA polymerase sigma-70 factor, ECF subfamily	ECF subfamily RNA polymerase sigma-24 factor; K03088 RNA polymerase sigma-70 factor, ECF subfamily	-	-	5e-49	163.6	22.7	186
RIFOXYC2_FULL_PER-ii_58_32_804	890193	893849	-	1219	K08647	PAPPA2	pappalysin-2 [EC:3.4.24.-]	hypothetical protein	-	-	1.4e-28	94.9	301.5	1219
RIFOXYC2_FULL_PER-ii_58_32_805	893959	895764	-	602	K01951	guaA, GMPS	GMP synthase (glutamine-hydrolysing) [EC:6.3.5.2]	guaA; GMP synthase (EC:6.3.5.2)	Drug metabolism - other enzymes Purine metabolism	M00050	5.9e-193	638.8	38.9	602
RIFOXYC2_FULL_PER-ii_58_32_806	895968	896336	+	123	-	-	#VALUE!	hypothetical protein	-	-	-	-	-	123
RIFOXYC2_FULL_PER-ii_58_32_807	896337	897731	-	465	K18814	ictB	putative inorganic carbon (hco3(-)) transporter	integral membrane protein	-	-	1.4e-05	20.1	64	465
RIFOXYC2_FULL_PER-ii_58_32_808	897801	899144	-	448	K01791	wecB	UDP-N-acetylglucosamine 2-epimerase (non-hydrolysing) [EC:5.1.3.14]	putative UDP-N-acetylglucosamine 2-epimerase (EC:5.1.3.14)	Amino sugar and nucleotide sugar metabolism	M00362	7.9e-72	238.9	38.6	448
RIFOXYC2_FULL_PER-ii_58_32_809	899179	899847	-	223	K01834	PGAM, gpmA	2,3-bisphosphoglycerate-dependent phosphoglycerate mutase [EC:5.4.2.11]	gpmA; 2,3-bisphosphoglycerate-independent phosphoglycerate mutase (EC:5.4.2.1)	Glycine, serine and threonine metabolism Glycolysis / Gluconeogenesis Methane metabolism	M00001; M00002; M00003	1e-83	277.7	50.7	223
RIFOXYC2_FULL_PER-ii_58_32_810	899910	900227	+	106	-	-	-	hypothetical protein	-	-	-	-	-	106
RIFOXYC2_FULL_PER-ii_58_32_811	900224	900967	+	248	K05946	E2.4.1.187, tagA	N-acetylglucosaminyldiphosphoundecaprenol N-acetyl-beta-D-mannosaminyltransferase [EC:2.4.1.187]	WecB/TagA/CpsF family glycosyl transferase (EC:2.4.1.187); K05946 N-acetylglucosaminyldiphosphoundecaprenol [EC:2.4.1.187]	-	-	9.6e-84	277.9	20.5	248
RIFOXYC2_FULL_PER-ii_58_32_812	901245	901976	+	244	K03981	dsbC	thiol:disulfide interchange protein DsbC [EC:5.3.4.1]	DSBA oxidoreductase	-	-	4.7e-10	35.5	100.1	244
RIFOXYC2_FULL_PER-ii_58_32_813	901960	902184	-	75	K09131	K09131	hypothetical protein	hypothetical protein; K09131 hypothetical protein	-	-	4.2e-24	82	19.4	75
RIFOXYC2_FULL_PER-ii_58_32_814	902295	903002	-	236	K00554	trmD	tRNA (guanine37-N1)-methyltransferase [EC:2.1.1.228]	trmD; tRNA (guanine-N1)-methyltransferase (EC:2.1.1.31); K00554 tRNA (guanine37-N1)-methyltransferase [EC:2.1.1.228]	-	-	2.8e-100	331.2	17.4	236
RIFOXYC2_FULL_PER-ii_58_32_815	903044	903748	-	235	K05846	opuBD	osmoprotectant transport system permease protein	hypothetical protein	ABC transporters	M00209	0.00083	15	166.3	235
RIFOXYC2_FULL_PER-ii_58_32_816	903812	904699	-	296	K00175	korB, oorB	2-oxoglutarate ferredoxin oxidoreductase subunit beta [EC:1.2.7.3]	pyruvate-ferredoxin oxidoreductase and related 2-oxoacid-ferredoxin oxidoreductases subunit beta; K00175 2-oxoglutarate ferredoxin oxidoreductase subunit beta [EC:1.2.7.3]	Carbon fixation pathways in prokaryotes Citrate cycle (TCA cycle)	M00009; M00011; M00173; M00620	7.3e-83	274.2	108.7	296
RIFOXYC2_FULL_PER-ii_58_32_817	904696	906453	-	586	K00174	korA, oorA	2-oxoglutarate ferredoxin oxidoreductase subunit alpha [EC:1.2.7.3]	pyruvate flavodoxin/ferredoxin oxidoreductase domain-containing protein; K00174 2-oxoglutarate ferredoxin oxidoreductase subunit alpha [EC:1.2.7.3]	Carbon fixation pathways in prokaryotes Citrate cycle (TCA cycle)	M00009; M00011; M00173; M00620	1.9e-156	518.1	136.9	586
RIFOXYC2_FULL_PER-ii_58_32_818	906450	906569	-	40	-	-	-	hypothetical protein	-	-	-	-	-	40
RIFOXYC2_FULL_PER-ii_58_32_819	906566	907033	-	156	K03839	fldA, nifF, isiB	flavodoxin I: Flavodoxin domain	hypothetical protein	-	-	6.1e-14	47.6	84.1	156
RIFOXYC2_FULL_PER-ii_58_32_820	907180	907380	+	67	K02529	lacI, galR	LacI family transcriptional regulator	hypothetical protein	-	-	5.3e-05	18.5	66.9	67
RIFOXYC2_FULL_PER-ii_58_32_821	907482	908444	+	321	-	-	-	hypothetical protein	-	-	-	-	-	321
RIFOXYC2_FULL_PER-ii_58_32_822	908730	909080	-	117	K02887	RP-L20, MRPL20, rplT	large subunit ribosomal protein L20	50S ribosomal protein L20; K02887 large subunit ribosomal protein L20	Ribosome	M00178	1.4e-43	145.5	25.9	117
RIFOXYC2_FULL_PER-ii_58_32_823	909084	909278	-	65	K02916	RP-L35, MRPL35, rpmI	large subunit ribosomal protein L35	50S ribosomal protein L35; K02916 large subunit ribosomal protein L35	Ribosome	M00178	4.5e-15	52.2	20	65
RIFOXYC2_FULL_PER-ii_58_32_824	909441	909989	-	183	K02520	infC, MTIF3	translation initiation factor IF-3	translation initiation factor IF-3; K02520 translation initiation factor IF-3	-	-	2.5e-42	141.7	26.8	183
RIFOXYC2_FULL_PER-ii_58_32_825	910075	910944	-	290	K01625	eda	2-dehydro-3-deoxyphosphogluconate aldolase / (4S)-4-hydroxy-2-oxoglutarate aldolase [EC:4.1.2.14 4.1.3.42]	hypothetical protein	Glyoxylate and dicarboxylate metabolism Pentose phosphate pathway	M00008; M00061; M00308; M00631	5.7e-05	18.8	55.8	290
RIFOXYC2_FULL_PER-ii_58_32_826	910941	911561	-	207	-	-	-	hypothetical protein	-	-	-	-	-	207
RIFOXYC2_FULL_PER-ii_58_32_827	911753	912808	+	352	K02836	prfB	peptide chain release factor 2	peptide chain release factor 2; K02836 peptide chain release factor 2	-	-	1.6e-154	511.3	56.3	352
RIFOXYC2_FULL_PER-ii_58_32_828	912939	913109	-	57	K03051	rpoF	DNA-directed RNA polymerase subunit F [EC:2.7.7.6]	hypothetical protein	Purine metabolism Pyrimidine metabolism RNA polymerase	M00184	0.00045	16.5	32.1	57
RIFOXYC2_FULL_PER-ii_58_32_829	913355	914578	-	408	K03294	TC.APA	basic amino acid/polyamine antiporter, APA family	amino acid permease-associated protein	-	-	4.6e-73	242.2	138.4	408
							tRNA (Ser)
RIFOXYC2_FULL_PER-ii_58_32_830	914847	916577	+	577	-	-	-	hypothetical protein	-	-	-	-	-	577
RIFOXYC2_FULL_PER-ii_58_32_831	916614	916772	+	53	-	-	-	hypothetical protein	-	-	-	-	-	53
RIFOXYC2_FULL_PER-ii_58_32_832	916783	917013	+	77	K08982	K08982	putative membrane protein	hypothetical protein	-	-	0.0005	16	28.4	77
RIFOXYC2_FULL_PER-ii_58_32_833	917013	918806	+	598	K00612	E2.1.3.-	carbamoyltransferase [EC:2.1.3.-]	putative carbamoyl transferase, NodU family	-	-	3.2e-231	766	69.7	598
RIFOXYC2_FULL_PER-ii_58_32_834	919036	920436	+	467	K01921	ddl	D-alanine-D-alanine ligase [EC:6.3.2.4]	hypothetical protein	D-Alanine metabolism Peptidoglycan biosynthesis	-	4.1e-06	22	126.4	467
RIFOXYC2_FULL_PER-ii_58_32_835	920622	921047	+	142	K02835	prfA, MTRF1, MRF1	peptide chain release factor 1	prfA3; peptide chain release factor 1	-	-	7e-25	84	46.8	142
RIFOXYC2_FULL_PER-ii_58_32_836	921044	921253	-	70	K02902	RP-L28, MRPL28, rpmB	large subunit ribosomal protein L28	LSU ribosomal protein L28P	Ribosome	M00178	2.9e-19	65.9	-	70
RIFOXYC2_FULL_PER-ii_58_32_837	921326	922009	+	228	K06402	spoIVFB	stage IV sporulation protein FB [EC:3.4.24.-]	peptidase M50	-	-	2.4e-14	49.5	68.6	228
RIFOXYC2_FULL_PER-ii_58_32_838	921995	922831	-	279	K00568	ubiG	2-polyprenyl-6-hydroxyphenyl methylase / 3-demethylubiquinone-9 3-methyltransferase [EC:2.1.1.222 2.1.1.64]	SAM-dependent methyltransferase	Ubiquinone and other terpenoid-quinone biosynthesis	M00117	2.4e-17	59.2	52.8	279
RIFOXYC2_FULL_PER-ii_58_32_839	922831	924066	-	412	K00754	E2.4.1.-	-	hypothetical protein	Fructose and mannose metabolism	-	3.5e-18	61.9	197.1	412
RIFOXYC2_FULL_PER-ii_58_32_840	924044	925078	-	345	K02366	EXT1	glucuronyl/N-acetylglucosaminyl transferase EXT1 [EC:2.4.1.224 2.4.1.225]	hypothetical protein	Glycosaminoglycan biosynthesis - heparan sulfate / heparin	M00059	7.2e-10	33.3	175.7	345
RIFOXYC2_FULL_PER-ii_58_32_841	925153	925788	+	212	K03183	ubiE	demethylmenaquinone methyltransferase / 2-methoxy-6-polyprenyl-1,4-benzoquinol methylase [EC:2.1.1.163 2.1.1.201]	conserved hypothetical protein; putative S-adenosyl-L-methionine (SAM)-dependent methyltransferase	Ubiquinone and other terpenoid-quinone biosynthesis	M00116; M00117	1.7e-06	23.9	129.7	212
RIFOXYC2_FULL_PER-ii_58_32_842	925970	926983	+	338	-	-	-	hypothetical protein	-	-	-	-	-	338
RIFOXYC2_FULL_PER-ii_58_32_843	927019	927519	-	167	K02496	hemX	uroporphyrin-III C-methyltransferase [EC:2.1.1.107]	Uncharacterized protein	Porphyrin and chlorophyll metabolism	M00121	0.0043	12.2	34	167
RIFOXYC2_FULL_PER-ii_58_32_844	927549	928910	-	454	K04307	LGR8	leucine-rich repeat-containing G protein-coupled receptor 8	hypothetical protein	Neuroactive ligand-receptor interaction	-	0.0018	12.6	463.3	454
RIFOXYC2_FULL_PER-ii_58_32_845	928937	929731	-	265	K00721	DPM1	dolichol-phosphate mannosyltransferase [EC:2.4.1.83]	dpm1; dolichyl-phosphate-mannose synthase	N-Glycan biosynthesis	-	2e-63	210.7	50.9	265
RIFOXYC2_FULL_PER-ii_58_32_846	929724	930836	-	371	K13010	per, rfbE	perosamine synthetase [EC:2.6.1.102]	glutamine--scyllo-inositol transaminase (EC:2.6.1.50)	Amino sugar and nucleotide sugar metabolism	-	8.9e-156	514.5	333.9	371
RIFOXYC2_FULL_PER-ii_58_32_847	930833	931246	-	138	K10712	ADO	cysteamine dioxygenase [EC:1.13.11.19]	hypothetical protein	Taurine and hypotaurine metabolism	-	0.0037	12.8	32.3	138
RIFOXYC2_FULL_PER-ii_58_32_848	931350	932756	+	469	K02200	ccmH	cytochrome c-type biogenesis protein CcmH -> ??	Dolichyl-phosphate-mannose-protein mannosyltransferase	-	-	0.0094	11.8	33.8	469
RIFOXYC2_FULL_PER-ii_58_32_849	932753	933142	+	130	K17320	lplC	putative aldouronate transport system permease protein	Interpro: polysaccharide biosynthesis and transport GrtA-like	ABC transporters	M00603	0.00098	14.4	140.9	130
RIFOXYC2_FULL_PER-ii_58_32_850	933139	934197	+	353	K03208	wcaI	colanic acid biosynthesis glycosyl transferase WcaI	group 1 glycosyl transferase	-	-	1.1e-20	69.9	69.9	353
RIFOXYC2_FULL_PER-ii_58_32_851	934172	935821	-	550	-	-	-	hypothetical protein	-	-	-	-	-	550
RIFOXYC2_FULL_PER-ii_58_32_852	935842	936573	-	244	K00721	DPM1	dolichol-phosphate mannosyltransferase [EC:2.4.1.83]	family 2 glycosyl transferase	N-Glycan biosynthesis	-	2.5e-40	134.5	158.9	244
RIFOXYC2_FULL_PER-ii_58_32_853	936653	937984	+	444	K01674	cah	carbonic anhydrase [EC:4.2.1.1] ; see notes:	hypothetical protein	Nitrogen metabolism	-	0.0066	11.7	107.6	444
RIFOXYC2_FULL_PER-ii_58_32_854	937981	938073	+	31	-	-	-	hypothetical protein	-	-	-	-	-	31
RIFOXYC2_FULL_PER-ii_58_32_855	938216	939253	-	346	K00754	E2.4.1.-	-	Glycosyltransferase	Fructose and mannose metabolism	-	2.3e-18	62.6	197.1	346
RIFOXYC2_FULL_PER-ii_58_32_856	939250	940389	-	380	K00754	E2.4.1.-	-	glycosyl transferase, group 1	Fructose and mannose metabolism	-	3.8e-35	117.8	197.1	380
RIFOXYC2_FULL_PER-ii_58_32_857	940469	941560	-	364	K02844	waaG, rfaG	UDP-glucose:(heptosyl)LPS alpha-1,3-glucosyltransferase [EC:2.4.1.-]	glucosyltransferase	Lipopolysaccharide biosynthesis	M00080	1.1e-25	86.4	214.1	364
RIFOXYC2_FULL_PER-ii_58_32_858	941924	943051	-	376	K01710	E4.2.1.46, rfbB, rffG	dTDP-glucose 4,6-dehydratase [EC:4.2.1.46]	NAD dependent epimerase/dehydratase family protein; K01710 dTDP-glucose 4,6-dehydratase [EC:4.2.1.46]	Biosynthesis of vancomycin group antibiotics Polyketide sugar unit biosynthesis Streptomycin biosynthesis	-	4.1e-91	302.4	53.5	376
RIFOXYC2_FULL_PER-ii_58_32_859	943115	944104	+	330	K00754	E2.4.1.-	-	glycosyl transferase family protein (EC:2.4.1.-)	Fructose and mannose metabolism	-	8.2e-18	61.1	161.2	330
RIFOXYC2_FULL_PER-ii_58_32_860	944109	945212	-	368	K00754	E2.4.1.-	-	group 1 glycosyl transferase	Fructose and mannose metabolism	-	4.8e-53	176.7	197.1	368
RIFOXYC2_FULL_PER-ii_58_32_861	945209	946276	-	356	K08256	pimA	phosphatidylinositol alpha-mannosyltransferase [EC:2.4.1.57]	group 1 glycosyl transferase	-	-	6.6e-40	133.2	197.9	356
RIFOXYC2_FULL_PER-ii_58_32_862	946371	946760	-	130	K09153	K09153	hypothetical protein	hypothetical protein; K09153 hypothetical protein	-	-	4.2e-16	55.1	18.7	130
RIFOXYC2_FULL_PER-ii_58_32_863	946770	947477	-	236	K00721	DPM1	dolichol-phosphate mannosyltransferase [EC:2.4.1.83]	dolichyl-phosphate mannose synthase-like protein	N-Glycan biosynthesis	-	2.4e-40	134.4	158.7	236
RIFOXYC2_FULL_PER-ii_58_32_864	947440	950250	-	937	-	-	-	Uncharacterized protein	-	-	-	-	-	937
RIFOXYC2_FULL_PER-ii_58_32_865	950322	951557	+	412	K11717	sufS	cysteine desulfurase / selenocysteine lyase [EC:2.8.1.7 4.4.1.16]	SufS subfamily cysteine desulfurase; K11717 cysteine desulfurase / selenocysteine lyase [EC:2.8.1.7 4.4.1.16]	Selenocompound metabolism	-	4.3e-173	572.6	78.7	412
RIFOXYC2_FULL_PER-ii_58_32_866	951620	952027	+	136	K04488	iscU, nifU	nitrogen fixation protein NifU and related proteins	NifU family SUF system FeS assembly protein; K04488 nitrogen fixation protein NifU and related proteins	-	-	7e-29	96.8	68.8	136
							tRNA (Thr)
RIFOXYC2_FULL_PER-ii_58_32_867	952235	952948	-	238	K03183	ubiE	demethylmenaquinone methyltransferase / 2-methoxy-6-polyprenyl-1,4-benzoquinol methylase [EC:2.1.1.163 2.1.1.201]	type 11 methyltransferase	Ubiquinone and other terpenoid-quinone biosynthesis	M00116; M00117	1.9e-09	33.3	52	238
RIFOXYC2_FULL_PER-ii_58_32_868	953094	953648	+	185	K02990	RP-S6, MRPS6, rpsF	small subunit ribosomal protein S6	hypothetical protein	Ribosome	M00178	9.2e-26	86.4	31.7	185
RIFOXYC2_FULL_PER-ii_58_32_869	953681	953926	+	82	K02963	RP-S18, MRPS18, rpsR	small subunit ribosomal protein S18	rpsR; 30S ribosomal protein S18; K02963 small subunit ribosomal protein S18	Ribosome	M00178	4.5e-20	68.8	21.4	82
RIFOXYC2_FULL_PER-ii_58_32_870	953968	954714	+	249	K18189	TACO1	translational activator of cytochrome c oxidase 1	hypothetical protein	-	-	9.3e-45	148.7	16.3	249
RIFOXYC2_FULL_PER-ii_58_32_871	954720	956411	-	564	-	-	-	hypothetical protein	-	-	-	-	-	564
RIFOXYC2_FULL_PER-ii_58_32_872	956520	959684	-	1055	K05366	mrcA	penicillin-binding protein 1A [EC:2.4.1.- 3.4.-.-]	1A family penicillin-binding protein	Peptidoglycan biosynthesis	-	4.2e-167	553.8	73.1	1055
RIFOXYC2_FULL_PER-ii_58_32_873	959764	960096	+	111	K18176	COA3	cytochrome c oxidase assembly factor 3, fungi type	hypothetical protein	-	-	0.0036	13.6	39.5	111
RIFOXYC2_FULL_PER-ii_58_32_874	960227	960823	+	199	K03350	APC3, CDC27	anaphase-promoting complex subunit 3	hypothetical protein	Cell cycle Cell cycle - yeast Meiosis - yeast Oocyte meiosis Ubiquitin mediated proteolysis	M00389	3.8e-17	58.2	15	199
RIFOXYC2_FULL_PER-ii_58_32_875	960929	961879	+	317	K09811	ftsX	cell division transport system permease protein	hypothetical protein; K09811 cell division transport system permease protein	ABC transporters	M00256	5.3e-22	74.4	65.6	317
RIFOXYC2_FULL_PER-ii_58_32_876	961903	962526	+	208	K03584	recO	DNA repair protein RecO (recombination protein O)	recO; DNA repair protein RecO; K03584 DNA repair protein RecO (recombination protein O)	Homologous recombination	-	4.6e-22	74.3	20.5	208
RIFOXYC2_FULL_PER-ii_58_32_877	962531	963166	-	212	K03086	SIG1, rpoD	RNA polymerase primary sigma factor	RpoD subfamily RNA polymerase sigma-70 subunit; K03086 RNA polymerase primary sigma factor	-	-	4.9e-28	94.6	32.1	212
RIFOXYC2_FULL_PER-ii_58_32_878	963211	964521	-	437	K18346	vanW	vancomycin resistance protein VanW	von Willebrand factor A	Two-component system	M00651	1.1e-19	66.7	19	437
RIFOXYC2_FULL_PER-ii_58_32_879	964556	965182	-	209	K03469	rnhA, RNASEH1	ribonuclease HI [EC:3.1.26.4]	ribonuclease HI	DNA replication	-	1.3e-48	161.4	46.6	209
RIFOXYC2_FULL_PER-ii_58_32_880	965232	966563	+	444	K03797	E3.4.21.102, prc, ctpA	carboxyl-terminal processing protease [EC:3.4.21.102]	carboxyl-terminal protease (EC:3.4.21.102); K03797 carboxyl-terminal processing protease [EC:3.4.21.102]	-	-	5.3e-124	410.8	43.9	444
RIFOXYC2_FULL_PER-ii_58_32_881	966570	966992	-	141	K00940	ndk, NME	nucleoside-diphosphate kinase [EC:2.7.4.6]	nucleoside-diphosphate kinase (EC:2.7.4.6); K00940 nucleoside-diphosphate kinase [EC:2.7.4.6]	Purine metabolism Pyrimidine metabolism	M00049; M00050; M00052; M00053	3.4e-53	176.5	23.7	141
RIFOXYC2_FULL_PER-ii_58_32_882	967058	968317	-	420	K07263	pqqL	zinc protease [EC:3.4.24.-]	Zn-dependent peptidase	-	-	5.3e-84	279.1	55.7	420
RIFOXYC2_FULL_PER-ii_58_32_883	968719	968865	+	49	K02914	RP-L34, MRPL34, rpmH	large subunit ribosomal protein L34	hypothetical protein	Ribosome	M00178	4.8e-12	42.3	18.1	49
RIFOXYC2_FULL_PER-ii_58_32_884	968975	969292	+	106	K02034	ABC.PE.P1	peptide/nickel transport system permease protein	hypothetical protein	-	M00239	0.00034	15.6	128	106
RIFOXYC2_FULL_PER-ii_58_32_885	969289	970035	-	249	K00798	MMAB, pduO	cob(I)alamin adenosyltransferase [EC:2.5.1.17]	ATP:cobalamin adenosyltransferase; K00798 cob(I)alamin adenosyltransferase [EC:2.5.1.17]	Porphyrin and chlorophyll metabolism	M00122	2.4e-60	200.4	30.5	249
RIFOXYC2_FULL_PER-ii_58_32_886	970100	972460	-	787	K01890	FARSB, pheT	phenylalanyl-tRNA synthetase beta chain [EC:6.1.1.20]	Phenylalanyl-tRNA synthetase subunit beta (EC:6.1.1.20); K01890 phenylalanyl-tRNA synthetase beta chain [EC:6.1.1.20]	Aminoacyl-tRNA biosynthesis	M00359; M00360	1.3e-178	591.8	152	787
RIFOXYC2_FULL_PER-ii_58_32_887	972579	972791	-	71	-	-	-	hypothetical protein	-	-	-	-	-	71
							tRNA (Ser)
RIFOXYC2_FULL_PER-ii_58_32_888	973234	973692	+	153	K03202	virB7, lvhB7	type IV secretion system protein VirB7	hypothetical protein	Bacterial secretion system	M00333	8e-05	18.6	22.4	153
RIFOXYC2_FULL_PER-ii_58_32_889	973712	974371	+	220	-	-	-	hypothetical protein	-	-	-	-	-	220
RIFOXYC2_FULL_PER-ii_58_32_890	974388	975323	-	312	K02347	dpx	DNA polymerase (family X);	polX; DNA polymerase X	-	-	1.6e-92	307	119.8	312
							972984..973070 Ser (tRNA)
RIFOXYC2_FULL_PER-ii_58_32_891	976532	977782	-	417	K01251	E3.3.1.1, ahcY	adenosylhomocysteinase [EC:3.3.1.1]	adenosylhomocysteinase (EC:3.3.1.1); K01251 adenosylhomocysteinase [EC:3.3.1.1]	Cysteine and methionine metabolism	M00035	7.9e-171	565.7	41.4	417
RIFOXYC2_FULL_PER-ii_58_32_892	977877	978830	-	318	K00856	E2.7.1.20, ADK	adenosine kinase [EC:2.7.1.20]	adenosine kinase (EC:2.7.1.20); K00856 adenosine kinase [EC:2.7.1.20]	Purine metabolism	-	6e-84	277.9	160.2	318
RIFOXYC2_FULL_PER-ii_58_32_893	979008	980318	+	437	K00012	UGDH, ugd	UDPglucose 6-dehydrogenase [EC:1.1.1.22]	ugd; UDP-glucose 6-dehydrogenase (EC:1.1.1.22); K00012 UDPglucose 6-dehydrogenase [EC:1.1.1.22]	Amino sugar and nucleotide sugar metabolism Ascorbate and aldarate metabolism Pentose and glucuronate interconversions Starch and sucrose metabolism	M00014; M00129; M00361; M00362	6.5e-191	631.8	45.6	437
RIFOXYC2_FULL_PER-ii_58_32_894	980380	980952	+	191	-	-	-	hypothetical protein	-	-	-	-	-	191
RIFOXYC2_FULL_PER-ii_58_32_895	980972	981919	+	316	K08679	E5.1.3.6	UDP-glucuronate 4-epimerase [EC:5.1.3.6]	wcaG; nucleoside-diphosphate-sugar epimerase; K08679 UDP-glucuronate 4-epimerase [EC:5.1.3.6]	Amino sugar and nucleotide sugar metabolism Starch and sucrose metabolism	-	6.6e-151	499.3	73.2	316
RIFOXYC2_FULL_PER-ii_58_32_896	982003	983214	-	404	-	-	-	hypothetical protein	-	-	-	-	-	404
RIFOXYC2_FULL_PER-ii_58_32_897	983199	984344	-	382	K00721	DPM1	dolichol-phosphate mannosyltransferase [EC:2.4.1.83]	dolichol monophosphate mannose synthase	N-Glycan biosynthesis	-	1.3e-82	274	50.9	382
RIFOXYC2_FULL_PER-ii_58_32_898	984373	985278	+	302	K01784	galE, GALE	UDP-glucose 4-epimerase [EC:5.1.3.2]	NAD dependent epimerase/dehydratase family	Amino sugar and nucleotide sugar metabolism Galactose metabolism	M00361; M00362; M00632	2.8e-74	246.5	115.1	302
RIFOXYC2_FULL_PER-ii_58_32_899	985333	987069	-	579	K01854	glf	UDP-galactopyranose mutase [EC:5.4.99.9]	amine oxidase	Amino sugar and nucleotide sugar metabolism Galactose metabolism	-	3.6e-24	81.6	60.1	579
RIFOXYC2_FULL_PER-ii_58_32_900	987102	987527	-	142	-	-	-	GtrA-like surface polysaccharide biosynthesis protein, GtrA	-	-	-	-	-	142
RIFOXYC2_FULL_PER-ii_58_32_901	987617	988900	+	428	K02474	wbpO	UDP-N-acetyl-D-galactosamine dehydrogenase [EC:1.1.1.-]	UDP-glucose/GDP-mannose dehydrogenase family protein (EC:1.1.1.-); K02474 UDP-N-acetyl-D-galactosamine dehydrogenase [EC:1.1.1.-]	Amino sugar and nucleotide sugar metabolism	-	5.1e-173	571.6	144.3	428
RIFOXYC2_FULL_PER-ii_58_32_902	988983	989648	-	222	K00568	ubiG	2-polyprenyl-6-hydroxyphenyl methylase / 3-demethylubiquinone-9 3-methyltransferase [EC:2.1.1.222 2.1.1.64]	type 11 methyltransferase	Ubiquinone and other terpenoid-quinone biosynthesis	M00117	1.6e-18	63	52.8	222
RIFOXYC2_FULL_PER-ii_58_32_903	989797	990825	+	343	K13668	pimB	phosphatidylinositol alpha-1,6-mannosyltransferase [EC:2.4.1.-]	hexosyltransferase; glycosyltransferase	-	-	2.2e-46	154.6	87.6	343
RIFOXYC2_FULL_PER-ii_58_32_904	990786	991859	-	358	K01711	gmd, GMDS	GDPmannose 4,6-dehydratase [EC:4.2.1.47]	GDP-mannose 4,6-dehydratase; K01711 GDPmannose 4,6-dehydratase [EC:4.2.1.47]	Amino sugar and nucleotide sugar metabolism Fructose and mannose metabolism	-	5.2e-187	619.6	43.6	358
RIFOXYC2_FULL_PER-ii_58_32_905	991862	992911	-	350	K17716	capD	UDP-glucose 4-epimerase [EC:5.1.3.2]	polysaccharide biosynthesis protein CapD	Amino sugar and nucleotide sugar metabolism Galactose metabolism	M00362	1.1e-100	332.7	99.4	350
RIFOXYC2_FULL_PER-ii_58_32_906	993006	993848	-	281	K01784	galE, GALE	UDP-glucose 4-epimerase [EC:5.1.3.2]	NAD-dependent epimerase/dehydratase	Amino sugar and nucleotide sugar metabolism Galactose metabolism	M00361; M00362; M00632	2.7e-39	131.4	115.1	281
RIFOXYC2_FULL_PER-ii_58_32_907	993841	994977	-	379	K01791	wecB	UDP-N-acetylglucosamine 2-epimerase (non-hydrolysing) [EC:5.1.3.14]	UDP-N-acetylglucosamine 2-epimerase (EC:5.1.3.14); K01791 UDP-N-acetylglucosamine 2-epimerase [EC:5.1.3.14]	Amino sugar and nucleotide sugar metabolism	M00362	1.4e-103	342.8	229.6	379
RIFOXYC2_FULL_PER-ii_58_32_908	994993	996045	-	351	K01654	E2.5.1.56, neuB	N-acetylneuraminate synthase [EC:2.5.1.56]	N-acylneuraminate-9-phosphate synthase (EC:2.5.1.57); K01654 N-acetylneuraminate synthase [EC:2.5.1.56]	Amino sugar and nucleotide sugar metabolism	-	4.4e-117	388	159.7	351
RIFOXYC2_FULL_PER-ii_58_32_909	996153	997100	+	316	K00568	ubiG	2-polyprenyl-6-hydroxyphenyl methylase / 3-demethylubiquinone-9 3-methyltransferase [EC:2.1.1.222 2.1.1.64]	methyltransferase (best domain hit); Interpro: SAM-dependent methyltransferase	Ubiquinone and other terpenoid-quinone biosynthesis	M00117	1.8e-20	69.5	52.8	316
RIFOXYC2_FULL_PER-ii_58_32_910	997105	998415	-	437	K00837	E2.6.1.-	-	class III aminotransferase (EC:5.4.3.8); K01845 glutamate-1-semialdehyde 2,1-aminomutase [EC:5.4.3.8]	-	-	9.2e-162	535.4	1105.4	437
RIFOXYC2_FULL_PER-ii_58_32_911	998493	999239	-	249	K00059	fabG	3-oxoacyl-[acyl-carrier protein] reductase [EC:1.1.1.100] - not confident based on domain hit	short chain dehydrogenase ; NCBI SDR_subroup 8, may be NAD binding	Biosynthesis of unsaturated fatty acids Biotin metabolism Fatty acid biosynthesis	M00083; M00572	1.3e-58	194.9	28.7	249
RIFOXYC2_FULL_PER-ii_58_32_912	999241	999966	-	242	K18431	legF, ptmB	CMP-N,N'-diacetyllegionaminic acid synthase [EC:2.7.7.82]	cytidylyltransferase	Amino sugar and nucleotide sugar metabolism	-	3.6e-60	199.7	206	242
RIFOXYC2_FULL_PER-ii_58_32_913	999979	1001160	-	394	K07134	K07134	COG: COG1365	N-acetyl sugar amidotransferase	-	-	5.1e-05	18.7	64.8	394
RIFOXYC2_FULL_PER-ii_58_32_914	1001240	1002067	-	276	K02500	hisF	cyclase [EC:4.1.3.-]	hisF2; imidazole glycerol phosphate synthase subunit HisF (EC:4.1.3.-)	Histidine metabolism	M00026	5.8e-91	300.8	85.4	276
RIFOXYC2_FULL_PER-ii_58_32_915	1002071	1002688	-	206	K02501	hisH	glutamine amidotransferase [EC:2.4.2.-]	imidazole glycerol phosphate synthase subunit hisH	Histidine metabolism	M00026	2.2e-77	255.6	63.1	206
RIFOXYC2_FULL_PER-ii_58_32_916	1002785	1003654	+	290	K13623	btaB	S-adenosylmethionine-diacylgycerolhomoserine-N-methlytransferase	Uncharacterized protein	Glycerophospholipid metabolism	-	1.8e-06	23.6	165.4	290
RIFOXYC2_FULL_PER-ii_58_32_917	1003668	1004744	+	359	K15894	pseB	UDP-N-acetylglucosamine 4,6-dehydratase [EC:4.2.1.115]	polysaccharide biosynthesis protein CapD	Amino sugar and nucleotide sugar metabolism	-	2.9e-140	462.8	361	359
RIFOXYC2_FULL_PER-ii_58_32_918	1004744	1005274	+	177	K03790	rimJ	ribosomal-protein-alanine N-acetyltransferase [EC:2.3.1.128]	putative N-acetyltransferase	-	-	1.8e-37	125.2	19.2	177
RIFOXYC2_FULL_PER-ii_58_32_919	1005271	1006464	+	398	K13010	per, rfbE	perosamine synthetase [EC:2.6.1.102]	DegT/DnrJ/EryC1/StrS aminotransferase	Amino sugar and nucleotide sugar metabolism	-	4e-127	420.2	333.9	398
RIFOXYC2_FULL_PER-ii_58_32_920	1006461	1007429	+	323	K00010	iolG	myo-inositol 2-dehydrogenase / D-chiro-inositol 1-dehydrogenase [EC:1.1.1.18 1.1.1.369]	putative dehydrogenase	Inositol phosphate metabolism Streptomycin biosynthesis	-	5.5e-50	166	88.4	323
RIFOXYC2_FULL_PER-ii_58_32_921	1007426	1008376	+	317	K07257	spsF	spore coat polysaccharide biosynthesis protein SpsF	acylneuraminate cytidylyltransferase: prediction of interpro	Amino sugar and nucleotide sugar metabolism	-	5.5e-93	308.9	105.9	317
RIFOXYC2_FULL_PER-ii_58_32_922	1008373	1009401	+	343	K15897	pseG	UDP-2,4-diacetamido-2,4,6-trideoxy-beta-L-altropyranose hydrolase [EC:3.6.1.57]	pseudaminic acid biosynthesis-associated protein PseG	Amino sugar and nucleotide sugar metabolism	-	7.1e-29	97.1	342.5	343
RIFOXYC2_FULL_PER-ii_58_32_923	1009398	1009874	+	159	K00680	E2.3.1.-	-	N-acetyltransferase GCN5	Aminobenzoate degradation Benzoate degradation Ethylbenzene degradation Limonene and pinene degradation Tyrosine metabolism	-	2.4e-22	75.6	87.9	159
RIFOXYC2_FULL_PER-ii_58_32_924	1009871	1010566	+	232	K00604	MTFMT, fmt	methionyl-tRNA formyltransferase [EC:2.1.2.9]	methionyl-tRNA formyltransferase	Aminoacyl-tRNA biosynthesis One carbon pool by folate	-	4.9e-85	280.6	82.5	232
RIFOXYC2_FULL_PER-ii_58_32_925	1010563	1011240	+	226	K16515	galB	4-oxalomesaconate hydratase [EC:4.2.1.83]	LmbE-like protein	Benzoate degradation	-	2.6e-16	55.6	58.3	226
RIFOXYC2_FULL_PER-ii_58_32_926	1011237	1012289	+	351	K15898	pseI, neuB3	pseudaminic acid synthase [EC:2.5.1.97]	pseudaminic acid synthase (EC:2.5.1.56); K01654 N-acetylneuraminate synthase [EC:2.5.1.56]	Amino sugar and nucleotide sugar metabolism	-	8e-150	495.9	433.1	351
RIFOXYC2_FULL_PER-ii_58_32_927	1012322	1013770	+	483	K07265	kpsS, lipB	capsular polysaccharide export protein	capsular polysaccharide biosynthesis protein	-	-	2e-06	23	122.9	483
RIFOXYC2_FULL_PER-ii_58_32_928	1013771	1015237	-	489	K07265	kpsS, lipB	capsular polysaccharide export protein	hypothetical protein	-	-	7.7e-13	44.1	122.9	489
RIFOXYC2_FULL_PER-ii_58_32_929	1015294	1017108	-	605	K11085	msbA	ATP-binding cassette, subfamily B, bacterial MsbA [EC:3.6.3.-]	xenobiotic-transporting ATPase (EC:3.6.3.44); K11085 ATP-binding cassette, subfamily B, bacterial MsbA [EC:3.6.3.-]	ABC transporters	-	4.5e-163	540.3	139.3	605
RIFOXYC2_FULL_PER-ii_58_32_930	1017254	1018387	-	378	K00754	E2.4.1.-	-	glycosyl transferase group 1	Fructose and mannose metabolism	-	1.1e-36	122.8	197.1	378
RIFOXYC2_FULL_PER-ii_58_32_931	1018548	1019639	+	364	-	-		hypothetical protein	-	-	-	-	-	364
							1020027..1021487: 16S rRNA
RIFOXYC2_FULL_PER-ii_58_32_932	1022154	1022387	+	78	K10440	rbsC	ribose transport system permease protein	hypothetical protein	ABC transporters	M00212	0.0099	10.6	173.6	78
RIFOXYC2_FULL_PER-ii_58_32_933	1022430	1023089	+	220	-	-	-	hypothetical protein	-	-	-	-	-	220
RIFOXYC2_FULL_PER-ii_58_32_934	1023093	1023536	-	148	-	-	-	hypothetical protein	-	-	-	-	-	148
RIFOXYC2_FULL_PER-ii_58_32_935	1023764	1023994	-	77	-	-	-	hypothetical protein	-	-	-	-	-	77
RIFOXYC2_FULL_PER-ii_58_32_936	1024026	1024799	-	258	K09015	sufD	Fe-S cluster assembly protein SufD	sufD; FeS assembly protein SufD; K09015 Fe-S cluster assembly protein SufD	-	-	3.4e-50	167.5	49.6	258
RIFOXYC2_FULL_PER-ii_58_32_937	1024911	1025237	+	109	K02460	gspK	general secretion pathway protein K	hypothetical protein	Bacterial secretion system	M00331	0.00013	16.8	60.6	109
RIFOXYC2_FULL_PER-ii_58_32_938	1025240	1025638	+	133	-	-	-	hypothetical protein	-	-	-	-	-	133
RIFOXYC2_FULL_PER-ii_58_32_939	1025625	1025942	-	106	-	-	-	hypothetical protein	-	-	-	-	-	106
RIFOXYC2_FULL_PER-ii_58_32_940	1025987	1027381	-	465	K09014	sufB	Fe-S cluster assembly protein SufB	membrane components of an uncharacterized iron-regulated ABC-type transporter SufB; K09014 Fe-S cluster assembly protein SufB	-	-	1.6e-205	679.1	86.5	465
RIFOXYC2_FULL_PER-ii_58_32_941	1027566	1029347	+	594	K02005	ABC.CD.TX	HlyD family secretion protein	RND family efflux transporter MFP subunit	-	-	4.5e-85	281.9	147.8	594
RIFOXYC2_FULL_PER-ii_58_32_942	1029344	1030090	+	249	K02003	ABC.CD.A	putative ABC transport system ATP-binding protein	ABC-type antimicrobial peptide transport system ATPase component; K02003 putative ABC transport system ATP-binding protein	-	M00258	1.8e-103	343.6	33.9	249
RIFOXYC2_FULL_PER-ii_58_32_943	1030100	1031338	+	413	K05685	macB	macrolide transport system ATP-binding/permease protein [EC:3.6.3.-]	antimicrobial peptide ABC transporter permease; K02004 putative ABC transport system permease protein	ABC transporters	M00709	3.8e-103	342.1	150	413
RIFOXYC2_FULL_PER-ii_58_32_944	1031372	1032589	+	406	K05685	macB	macrolide transport system ATP-binding/permease protein [EC:3.6.3.-]	hypothetical protein	ABC transporters	M00709	7.2e-103	341.2	150	406
RIFOXYC2_FULL_PER-ii_58_32_945	1032661	1032780	+	40	-	-	-	hypothetical protein	-	-	-	-	-	40
RIFOXYC2_FULL_PER-ii_58_32_946	1032820	1033221	+	134	K03297	emrE, qac, mmr, smr	small multidrug resistance pump	hypothetical protein	-	-	0.00063	15.3	115.1	134
RIFOXYC2_FULL_PER-ii_58_32_947	1033218	1033565	+	116	-	-	-	hypothetical protein	-	-	-	-	-	116
RIFOXYC2_FULL_PER-ii_58_32_948	1033595	1034347	-	251	K09807	K09807	hypothetical protein	hypothetical protein; K09807 hypothetical protein	-	-	2.2e-60	200.5	65.7	251
RIFOXYC2_FULL_PER-ii_58_32_949	1034431	1035192	-	254	K09013	sufC	Fe-S cluster assembly ATP-binding protein	FeS assembly ATPase SufC; K09013 Fe-S cluster assembly ATP-binding protein	-	-	2.7e-97	321.6	60.9	254
RIFOXYC2_FULL_PER-ii_58_32_950	1035264	1035545	+	94	K04755	fdx	ferredoxin, 2Fe-2S	ferredoxin; K04755 ferredoxin, 2Fe-2S	-	-	5.4e-27	90.4	34	94
RIFOXYC2_FULL_PER-ii_58_32_951	1035542	1036306	-	255	K09667	OGT	protein O-GlcNAc transferase [EC:2.4.1.255]	hypothetical protein	Other types of O-glycan biosynthesis	-	1.1e-18	62	269.8	255
RIFOXYC2_FULL_PER-ii_58_32_952	1036468	1037430	-	321	K02341	DPO3D2, holB	DNA polymerase III subunit delta' [EC:2.7.7.7]	DNA polymerase III subunit delta' (EC:2.7.7.7); K02341 DNA polymerase III subunit delta' [EC:2.7.7.7]	DNA replication Homologous recombination Mismatch repair Purine metabolism Pyrimidine metabolism	M00260	2.5e-59	197.9	37.8	321
RIFOXYC2_FULL_PER-ii_58_32_953	1037462	1040203	-	914	K03070	secA	preprotein translocase subunit SecA	secA; translocase binding subunit (ATPase)	Bacterial secretion system Protein export	M00335	0	1169.8	29	914
RIFOXYC2_FULL_PER-ii_58_32_954	1040293	1040940	-	216	K14742	tsaB	tRNA threonylcarbamoyladenosine biosynthesis protein TsaB	hypothetical protein	-	-	5.6e-15	52	68.9	216
RIFOXYC2_FULL_PER-ii_58_32_955	1041056	1041967	+	304	K07011	K07011	COG: COG1216	glycosyl transferase family protein	-	-	4.9e-23	77.7	33.4	304
RIFOXYC2_FULL_PER-ii_58_32_956	1042196	1043413	+	406	K03588	ftsW, spoVE	cell division protein FtsW	stage V sporulation protein E; K03588 cell division protein FtsW	Cell cycle - Caulobacter	-	1.1e-117	389.4	66.6	406
RIFOXYC2_FULL_PER-ii_58_32_957	1043461	1044507	+	349	K02563	murG	UDP-N-acetylglucosamine--N-acetylmuramyl-(pentapeptide) pyrophosphoryl-undecaprenol N-acetylglucosamine transferase [EC:2.4.1.227]	UDP-N-acetylglucosamine--N-acetylmuramyl-(pentapeptide) pyrophosphoryl-UDP N-acetylglucosamine transferase (EC:2.4.1.227); K02563 UDP-N-acetylglucosamine--N-acetylmuramyl-(pentapeptide) pyrophosphoryl-undecaprenol N-acetylglucosamine transferase [EC:2.4.1.227]	Cell cycle - Caulobacter Peptidoglycan biosynthesis	-	4.9e-93	308.7	58.9	349
RIFOXYC2_FULL_PER-ii_58_32_958	1044542	1045210	+	223	K03768	PPIB, ppiB	peptidyl-prolyl cis-trans isomerase B (cyclophilin B) [EC:5.2.1.8]	hypothetical protein; K12736 peptidylprolyl isomerase domain and WD repeat-containing protein 1 [EC:5.2.1.8]	-	-	1.9e-62	207.7	25.6	223
RIFOXYC2_FULL_PER-ii_58_32_959	1045442	1046914	+	491	K01885	EARS, gltX	glutamyl-tRNA synthetase [EC:6.1.1.17]	glutamyl/glutaminyl-tRNA synthetase	Aminoacyl-tRNA biosynthesis Porphyrin and chlorophyll metabolism	M00121; M00359; M00360	1.5e-183	608.7	64.1	491
RIFOXYC2_FULL_PER-ii_58_32_960	1047228	1047692	+	155	K05595	marC	multiple antibiotic resistance protein	hypothetical protein	-	-	0.0002	16.7	24.9	155
RIFOXYC2_FULL_PER-ii_58_32_961	1047790	1048614	+	275	K00075	murB	UDP-N-acetylmuramate dehydrogenase [EC:1.3.1.98]	murB; UDP-N-acetylenolpyruvoylglucosamine reductase (MurB-like) (EC:1.1.1.158)	Amino sugar and nucleotide sugar metabolism Peptidoglycan biosynthesis	-	8.8e-69	227.6	41.3	275
RIFOXYC2_FULL_PER-ii_58_32_962	1048874	1049731	-	286	K03111	ssb	single-strand DNA-binding protein	single-strand binding protein; K03111 single-strand DNA-binding protein	DNA replication Homologous recombination Mismatch repair	-	1.3e-69	231.3	15.2	286
RIFOXYC2_FULL_PER-ii_58_32_963	1049923	1053012	+	1030	-	-	-	hypothetical protein	-	-	-	-	-	1030
RIFOXYC2_FULL_PER-ii_58_32_964	1053009	1053845	+	279	-	-	-	hypothetical protein	-	-	-	-	-	279
RIFOXYC2_FULL_PER-ii_58_32_965	1053842	1054630	+	263	-	-	-	hypothetical protein	-	-	-	-	-	263
RIFOXYC2_FULL_PER-ii_58_32_966	1054627	1057089	+	821	K07025	K07025	putative hydrolase of the HAD superfamily	hypothetical protein	-	-	0.0017	13.7	128	821
RIFOXYC2_FULL_PER-ii_58_32_967	1057090	1058652	+	521	-	-	-	hypothetical protein	-	-	-	-	-	521
RIFOXYC2_FULL_PER-ii_58_32_968	1058784	1062581	+	1266	K02337	DPO3A1, dnaE	DNA polymerase III subunit alpha [EC:2.7.7.7]	DNA polymerase III subunit alpha (EC:2.7.7.7); K02337 DNA polymerase III subunit alpha [EC:2.7.7.7]	DNA replication Homologous recombination Mismatch repair Purine metabolism Pyrimidine metabolism	M00260	0	1464.7	64.1	1266
RIFOXYC2_FULL_PER-ii_58_32_969	1062581	1063222	+	214	K07566	tsaC, rimN, SUA5	L-threonylcarbamoyladenylate synthase [EC:2.7.7.87]	Sua5/YciO/YrdC/YwlC family protein; K07566 tRNA threonylcarbamoyladenosine biosynthesis protein	-	-	8.8e-52	172.4	18.2	214
RIFOXYC2_FULL_PER-ii_58_32_970	1063495	1063941	+	149	K07738	nrdR	transcriptional repressor NrdR	nrdR; NrdR family transcriptional regulator; K07738 transcriptional repressor NrdR	-	-	2.5e-62	205.8	32.6	149
RIFOXYC2_FULL_PER-ii_58_32_971	1064053	1065813	+	587	K01876	DARS, aspS	aspartyl-tRNA synthetase [EC:6.1.1.12]	aspS; aspartyl-tRNA synthetase (EC:6.1.1.12); K01876 aspartyl-tRNA synthetase [EC:6.1.1.12]	Aminoacyl-tRNA biosynthesis	M00359; M00360	1.9e-248	823.1	71.7	587
RIFOXYC2_FULL_PER-ii_58_32_972	1065876	1066862	+	329	-	-	-	42.t00003; hypothetical protein	-	-	-	-	-	329
							tRNA (Leu)
RIFOXYC2_FULL_PER-ii_58_32_973	1067216	1068697	-	494	K00808	hss	homospermidine synthase [EC:2.5.1.44] - or Saccharopine dehydrogenase? / lysine degradation? (bifunctional enzyme) In some organisms this enzyme is found as a bifunctional polypeptide with lysine ketoglutarate reductase	homospermidine synthase (EC:2.5.1.44); K00808 homospermidine synthase [EC:2.5.1.44]	Tropane, piperidine and pyridine alkaloid biosynthesis	-	1.9e-164	543.5	42.3	494
RIFOXYC2_FULL_PER-ii_58_32_974	1068819	1070531	-	571	K02663	pilN	type IV pilus assembly protein PilN	hypothetical protein	-	-	0.00032	16.4	21.2	571
RIFOXYC2_FULL_PER-ii_58_32_975	1070537	1070887	-	117	K17785	IMMT, FCJ1, MNOS2	mitofilin	hypothetical protein	-	-	0.00011	16.9	168.4	117
RIFOXYC2_FULL_PER-ii_58_32_976	1070962	1074141	-	1060	K03723	mfd	transcription-repair coupling factor (superfamily II helicase) [EC:3.6.4.-]	transcription-repair coupling factor; K03723 transcription-repair coupling factor (superfamily II helicase) [EC:3.6.4.-]	Nucleotide excision repair	-	0	1162.5	67.6	1060
RIFOXYC2_FULL_PER-ii_58_32_977	1074399	1075580	-	394	K02338	DPO3B, dnaN	DNA polymerase III subunit beta [EC:2.7.7.7]	DNA polymerase III subunit beta (EC:2.7.7.7); K02338 DNA polymerase III subunit beta [EC:2.7.7.7]	DNA replication Homologous recombination Mismatch repair Purine metabolism Pyrimidine metabolism	M00260	7.4e-82	271.3	95.4	394
RIFOXYC2_FULL_PER-ii_58_32_978	1075973	1077271	-	433	K00973	E2.7.7.24, rfbA, rffH	glucose-1-phosphate thymidylyltransferase [EC:2.7.7.24]	nucleotidyl transferase; K04042 bifunctional UDP-N-acetylglucosamine pyrophosphorylase / Glucosamine-1-phosphate N-acetyltransferase [EC:2.7.7.23 2.3.1.157]	Polyketide sugar unit biosynthesis Streptomycin biosynthesis	-	2.7e-56	186.9	18.9	433
RIFOXYC2_FULL_PER-ii_58_32_979	1077319	1078107	-	263	K02238	comEC	competence protein ComEC	metallo-beta-lactamase family protein	-	M00429	4e-63	210	40.8	263
RIFOXYC2_FULL_PER-ii_58_32_980	1078203	1079573	-	457	K08132	COL12A	collagen, type XII, alpha	hypothetical protein	-	-	0.00062	11.9	527.9	457
RIFOXYC2_FULL_PER-ii_58_32_981	1079609	1081108	-	500	K03328	TC.PST	polysaccharide transporter, PST family	wzx; flippase Wzx	-	-	4.5e-09	31.7	78.3	500
RIFOXYC2_FULL_PER-ii_58_32_982	1081202	1082119	+	306	K00609	pyrB, PYR2	aspartate carbamoyltransferase catalytic subunit [EC:2.1.3.2]	aspartate carbamoyltransferase; K00609 aspartate carbamoyltransferase catalytic subunit [EC:2.1.3.2]	Alanine, aspartate and glutamate metabolism Pyrimidine metabolism	M00051	6.2e-116	384	57.4	306
RIFOXYC2_FULL_PER-ii_58_32_983	1082116	1083444	+	443	K01465	URA4, pyrC	dihydroorotase [EC:3.5.2.3]	dihydroorotase (EC:3.5.2.3); K01465 dihydroorotase [EC:3.5.2.3]	Pyrimidine metabolism	M00051	6.2e-131	433.9	74.3	443
RIFOXYC2_FULL_PER-ii_58_32_984	1083713	1085440	-	576	K12574	rnj	ribonuclease J [EC:3.1.-.-]	RNA-metabolizing metallo-beta-lactamase family protein; K12574 ribonuclease J [EC:3.1.-.-]	RNA degradation	-	1e-185	614.5	82.7	576
RIFOXYC2_FULL_PER-ii_58_32_985	1085868	1087817	+	650	K19225	gluP	rhomboid protease GluP [EC:3.4.21.105]	coiled-coil 320..341	-	-	0.0011	14.3	82.4	650
RIFOXYC2_FULL_PER-ii_58_32_986	1087997	1088383	+	129	K14656	ribL	FAD synthetase	cytidyltransferase	Riboflavin metabolism	-	2.7e-32	108.2	141.1	129
RIFOXYC2_FULL_PER-ii_58_32_987	1088460	1089068	+	203	K13688	chvB, cgs, ndvB	cyclic beta-1,2-glucan synthetase [EC:2.4.1.-]	hypothetical protein	-	-	0.00068	12.4	534.2	203
RIFOXYC2_FULL_PER-ii_58_32_988	1089108	1089866	+	253	K02654	pilD, pppA	leader peptidase (prepilin peptidase) / N-methyltransferase [EC:3.4.23.43 2.1.1.-]	putative Prepilin peptidase (EC:3.4.23.43)	-	M00331	1.3e-52	175.2	36.3	253
RIFOXYC2_FULL_PER-ii_58_32_989	1090121	1090558	+	146	K03664	smpB	SsrA-binding protein	smpB; SsrA-binding protein; K03664 SsrA-binding protein	-	-	6e-53	175.7	18.5	146
RIFOXYC2_FULL_PER-ii_58_32_990	1090615	1091211	+	199	K06187	recR	recombination protein RecR	recR; recombination protein RecR; K06187 recombination protein RecR	Homologous recombination	-	1.3e-88	294.3	48.5	199
RIFOXYC2_FULL_PER-ii_58_32_991	1091278	1091811	-	178	-	-	-	hypothetical protein	-	-	-	-	-	178
RIFOXYC2_FULL_PER-ii_58_32_992	1091868	1092986	-	373	K11456	PHC1, EDR1	polyhomeotic-like protein 1	Uncharacterized protein	-	-	1.8e-05	19.2	358	373
RIFOXYC2_FULL_PER-ii_58_32_993	1092979	1093479	-	167	K03088	SIG3.2, rpoE	RNA polymerase sigma-70 factor, ECF subfamily	ECF subfamily RNA polymerase sigma-24 subunit; K03088 RNA polymerase sigma-70 factor, ECF subfamily	-	-	4.3e-38	127.8	16.5	167
RIFOXYC2_FULL_PER-ii_58_32_994	1093552	1095069	-	506	K00602	purH	phosphoribosylaminoimidazolecarboxamide formyltransferase / IMP cyclohydrolase [EC:2.1.2.3 3.5.4.10]	purH; bifunctional phosphoribosylaminoimidazolecarboxamide formyltransferase/IMP cyclohydrolase (EC:2.1.2.3); K00602 phosphoribosylaminoimidazolecarboxamide formyltransferase / IMP cyclohydrolase [EC:2.1.2.3 3.5.4.10]	One carbon pool by folate Purine metabolism	M00048	3.6e-220	729.1	61.4	506
RIFOXYC2_FULL_PER-ii_58_32_995	1095500	1097617	-	706	K15987	hppA	K(+)-stimulated pyrophosphate-energized sodium pump [EC:3.6.1.1]	V-type H(+)-translocating pyrophosphatase (EC:3.6.1.1); K15987 K(+)-stimulated pyrophosphate-energized sodium pump [EC:3.6.1.1]	Oxidative phosphorylation	-	3.5e-264	874.8	219.8	706
RIFOXYC2_FULL_PER-ii_58_32_996	1097811	1098269	+	153	K02483	K02483	two-component system, OmpR family, response regulator	winged helix family two component transcriptional regulator	-	-	4.2e-27	91.1	146.6	153
RIFOXYC2_FULL_PER-ii_58_32_997	1098272	1100095	+	608	K02652	pilB	type IV pilus assembly protein PilB	type II secretion system protein E; K02652 type IV pilus assembly protein PilB	-	-	6.1e-194	642.4	75.5	608
RIFOXYC2_FULL_PER-ii_58_32_998	1100079	1101284	+	402	K02653	pilC	type IV pilus assembly protein PilC	type II secretion system F domain-containing protein; K02653 type IV pilus assembly protein PilC	-	-	1.4e-79	263.7	78.6	402
RIFOXYC2_FULL_PER-ii_58_32_999	1101313	1104192	+	960	K08085	fimU	type IV fimbrial biogenesis protein FimU	Uncharacterized protein	-	-	1.4e-07	27.4	85	960
RIFOXYC2_FULL_PER-ii_58_32_1000	1104219	1105811	+	531	K02458	gspI	general secretion pathway protein I	Putative uncharacterized protein	Bacterial secretion system	M00331	1e-06	24.8	45.7	531
RIFOXYC2_FULL_PER-ii_58_32_1001	1105808	1106230	+	141	-	-	-	hypothetical protein	-	-	-	-	-	141
RIFOXYC2_FULL_PER-ii_58_32_1002	1106227	1106874	+	216	K02672	pilW	type IV pilus assembly protein PilW	hypothetical protein	-	-	5.6e-07	24.9	35.6	216
RIFOXYC2_FULL_PER-ii_58_32_1003	1107006	1107452	+	149	K02456	gspG	general secretion pathway protein G	Uncharacterized protein	Bacterial secretion system	M00331	3.2e-21	72.9	68.8	149
RIFOXYC2_FULL_PER-ii_58_32_1004	1107601	1109175	+	525	K07636	phoR	two-component system, OmpR family, phosphate regulon sensor histidine kinase PhoR [EC:2.7.13.3]	multi-sensor signal transduction histidine kinase; K07636 two-component system, OmpR family, phosphate regulon sensor histidine kinase PhoR [EC:2.7.13.3]	Two-component system	M00434	1.3e-90	300.9	44.9	525
RIFOXYC2_FULL_PER-ii_58_32_1005	1109267	1109683	+	139	-	-	-	hypothetical protein	-	-	-	-	-	139
							tRNA (Thr) 1109810..1109881 (small overlap with following gene)
RIFOXYC2_FULL_PER-ii_58_32_1006	1109863	1111146	-	428	K00830	AGXT	alanine-glyoxylate transaminase / serine-glyoxylate transaminase / serine-pyruvate transaminase [EC:2.6.1.44 2.6.1.45 2.6.1.51]	class V aminotransferase; K00830 alanine-glyoxylate transaminase / serine-glyoxylate transaminase / serine-pyruvate transaminase [EC:2.6.1.44 2.6.1.45 2.6.1.51]	Alanine, aspartate and glutamate metabolism Glycine, serine and threonine metabolism Glyoxylate and dicarboxylate metabolism Methane metabolism Peroxisome	M00346; M00532	1.3e-69	231.3	210.2	428
RIFOXYC2_FULL_PER-ii_58_32_1007	1111330	1112664	+	445	K00996	rfbP	undecaprenyl-phosphate galactose phosphotransferase [EC:2.7.8.6]	undecaprenyl-phosphate galactose phosphotransferase (EC:2.7.8.6)	-	-	7.2e-80	265.4	298.9	445
RIFOXYC2_FULL_PER-ii_58_32_1008	1112741	1115014	-	758	K03722	dinG	ATP-dependent DNA helicase DinG [EC:3.6.4.12]	dinG; putative ATP-dependent DNA helicase DinG (EC:3.6.1.-); K03722 ATP-dependent DNA helicase DinG [EC:3.6.4.12]	-	-	9.5e-54	178.9	189.5	758
RIFOXYC2_FULL_PER-ii_58_32_1009	1115054	1116259	-	402	K02600	nusA	N utilization substance protein A	nusA; transcription elongation factor NusA	-	-	6.3e-134	443.6	78.4	402
RIFOXYC2_FULL_PER-ii_58_32_1010	1116409	1116834	+	142	K03101	lspA	signal peptidase II [EC:3.4.23.36]	lipoprotein signal peptidase (EC:3.4.23.36)	Protein export	-	6.3e-31	103.5	22.2	142
RIFOXYC2_FULL_PER-ii_58_32_1011	1116968	1118293	+	442	K00790	murA	UDP-N-acetylglucosamine 1-carboxyvinyltransferase [EC:2.5.1.7]	protein MurA2; K00790 UDP-N-acetylglucosamine 1-carboxyvinyltransferase [EC:2.5.1.7]	Amino sugar and nucleotide sugar metabolism Peptidoglycan biosynthesis	-	3.3e-146	483.5	96.5	442
RIFOXYC2_FULL_PER-ii_58_32_1012	1118312	1120105	+	598	K09667	OGT	protein O-GlcNAc transferase [EC:2.4.1.255]	hypothetical protein	Other types of O-glycan biosynthesis	-	1.5e-19	64.9	269.8	598
RIFOXYC2_FULL_PER-ii_58_32_1013	1120163	1120711	+	183	-	-	-	hypothetical protein	-	-	-	-	-	183
							tRNA (Arg)
RIFOXYC2_FULL_PER-ii_58_32_1014	1121158	1121997	-	280	K01591	pyrF	orotidine-5'-phosphate decarboxylase [EC:4.1.1.23]	orotidine 5''-phosphate decarboxylase, subfamily 2	Pyrimidine metabolism	M00051	1.9e-98	326.4	35.7	280
RIFOXYC2_FULL_PER-ii_58_32_1015	1122472	1123971	-	500	K07391	comM	magnesium chelatase family protein	Mg chelatase-like protein; K07391 magnesium chelatase family protein	-	-	8.9e-188	621.7	53.7	500
RIFOXYC2_FULL_PER-ii_58_32_1016	1124127	1124483	+	119	K07460	yraN	putative endonuclease	hypothetical protein	-	-	6.2e-29	97.2	20.4	119
RIFOXYC2_FULL_PER-ii_58_32_1017	1124521	1124763	+	81	-	-		hypothetical protein	-	-	-	-	-	81
RIFOXYC2_FULL_PER-ii_58_32_1018	1125442	1126653	+	404	K00789	metK	S-adenosylmethionine synthetase [EC:2.5.1.6]	methionine adenosyltransferase (EC:2.5.1.6)	Cysteine and methionine metabolism	M00034; M00035; M00368; M00609	8.3e-196	647.1	19	404
RIFOXYC2_FULL_PER-ii_58_32_1019	1126677	1126889	+	71	K01895	ACSS, acs	acetyl-CoA synthetase [EC:6.2.1.1]: too short: Eukaryotic domain - seems to make acCoA from 4 to 12 C fatty acids	hypothetical protein : has domain of interest for ac-CoA (very novel sequence)	Carbon fixation pathways in prokaryotes Glycolysis / Gluconeogenesis Methane metabolism Propanoate metabolism Pyruvate metabolism	M00357	9.9e-05	16.7	236	71
RIFOXYC2_FULL_PER-ii_58_32_1020	1126907	1127476	+	190	K07002	K07002	COG: COG3545 (NCBI domain: alpha/beta hydrolase): cytoplasmic (psortb)	esterase; K07002	-	-	2.5e-69	228.6	30.9	190
RIFOXYC2_FULL_PER-ii_58_32_1021	1127465	1128154	-	230	K07043	K07043	COG: COG1451: Predicted metal-dependent hydrolase YgjP	hypothetical protein; K07043	-	-	7.9e-36	120.4	21.9	230
RIFOXYC2_FULL_PER-ii_58_32_1022	1128245	1130260	-	672	K06381	spoIID	stage II sporulation protein D	N-acetylmuramoyl-L-alanine amidase family 2 protein	-	-	2.6e-44	147.9	37.9	672
RIFOXYC2_FULL_PER-ii_58_32_1023	1130351	1131490	-	380	K02844	waaG, rfaG	UDP-glucose:(heptosyl)LPS alpha-1,3-glucosyltransferase [EC:2.4.1.-]	group 1 glycosyl transferase (EC:2.4.1.-)	Lipopolysaccharide biosynthesis	M00080	6.7e-39	129.8	214.1	380
RIFOXYC2_FULL_PER-ii_58_32_1024	1131590	1132021	-	144	K03413	cheY	two-component system, chemotaxis family, response regulator CheY	hypothetical protein	Bacterial chemotaxis Two-component system	M00506	7.7e-15	51.1	33.3	144
RIFOXYC2_FULL_PER-ii_58_32_1025	1132021	1132407	-	129	K17667	PET111	protein PET111, mitochondrial	hypothetical protein	-	-	0.0038	11.1	17.3	129
RIFOXYC2_FULL_PER-ii_58_32_1026	1132676	1133020	-	115	K12106	cag21	cag pathogenicity island protein 21	hypothetical protein	-	M00564	0.0034	13.4	21.1	115
RIFOXYC2_FULL_PER-ii_58_32_1027	1133046	1133363	-	106	-	-	-	hypothetical protein	-	-	-	-	-	106
RIFOXYC2_FULL_PER-ii_58_32_1028	1133379	1134704	-	442	K01875	SARS, serS	seryl-tRNA synthetase [EC:6.1.1.11]	seryl-tRNA synthetase (EC:6.1.1.11); K01875 seryl-tRNA synthetase [EC:6.1.1.11]	Aminoacyl-tRNA biosynthesis	M00359; M00360	2.1e-150	498.2	54	442
RIFOXYC2_FULL_PER-ii_58_32_1029	1134749	1135030	-	94	-	-	-	hypothetical protein	-	-	-	-	-	94
RIFOXYC2_FULL_PER-ii_58_32_1030	1135171	1137150	+	660	K03702	uvrB	excinuclease ABC subunit B	excinuclease ABC subunit B; K03702 excinuclease ABC subunit B	Nucleotide excision repair	-	0	1047.6	32.2	660
RIFOXYC2_FULL_PER-ii_58_32_1031	1137187	1137624	-	146	-	-	-	hypothetical protein	-	-	-	-	-	146
RIFOXYC2_FULL_PER-ii_58_32_1032	1137800	1138186	+	129	-	-	-	hypothetical protein	-	-	-	-	-	129
RIFOXYC2_FULL_PER-ii_58_32_1033	1138199	1139029	-	277	K00963	UGP2, galU, galF	UTP--glucose-1-phosphate uridylyltransferase [EC:2.7.7.9]	UTP--glucose-1-phosphate uridylyltransferase (EC:2.7.7.9)	Amino sugar and nucleotide sugar metabolism Galactose metabolism Pentose and glucuronate interconversions Starch and sucrose metabolism	M00129; M00361; M00362; M00549	7.8e-95	314	67.3	277
RIFOXYC2_FULL_PER-ii_58_32_1034	1139203	1139475	+	91	K18843	hicB	antitoxin HicB	hypothetical protein	-	-	0.00033	16.2	23.4	91
RIFOXYC2_FULL_PER-ii_58_32_1035	1139477	1139935	-	153	K13993	HSP20	HSP20 family protein	hypothetical protein	Protein processing in endoplasmic reticulum	-	8.3e-26	86.8	75	153
RIFOXYC2_FULL_PER-ii_58_32_1036	1140139	1140762	+	208	K01077	E3.1.3.1, phoA, phoB	alkaline phosphatase [EC:3.1.3.1]	membrane protein DedA	Aminobenzoate degradation Folate biosynthesis Two-component system	M00126	7.8e-37	122.9	80.4	208
RIFOXYC2_FULL_PER-ii_58_32_1037	1140759	1141538	+	260	K06153	bacA	undecaprenyl-diphosphatase [EC:3.6.1.27]	undecaprenol kinase; K06153 undecaprenyl-diphosphatase [EC:3.6.1.27]	Peptidoglycan biosynthesis	-	7.9e-70	231.5	28.1	260
RIFOXYC2_FULL_PER-ii_58_32_1038	1141648	1141872	+	75	K07729	K07729	putative transcriptional regulator	XRE family transcriptional regulator; K07729 putative transcriptional regulator	-	-	2.9e-23	78.3	33.8	75
RIFOXYC2_FULL_PER-ii_58_32_1039	1141888	1142346	-	153	K05432	IL9	interleukin 9	hypothetical protein	Cytokine-cytokine receptor interaction Jak-STAT signaling pathway	-	0.0077	12.1	20	153
RIFOXYC2_FULL_PER-ii_58_32_1040	1142396	1144087	-	564	K07462	recJ	single-stranded-DNA-specific exonuclease [EC:3.1.-.-]	single-stranded-DNA-specific exonuclease RecJ; K07462 single-stranded-DNA-specific exonuclease [EC:3.1.-.-]	Base excision repair Homologous recombination Mismatch repair	-	9.1e-151	499.8	68.1	564
RIFOXYC2_FULL_PER-ii_58_32_1041	1144166	1144705	-	180	K06142	hlpA, ompH	outer membrane protein	hypothetical protein	-	-	0.0053	12.3	22	180
RIFOXYC2_FULL_PER-ii_58_32_1042	1144732	1145745	-	338	-	-	-	thrombospondin type 3 repeat family	-	-	-	-	-	338
RIFOXYC2_FULL_PER-ii_58_32_1043	1145819	1146907	+	363	K03686	dnaJ	molecular chaperone DnaJ	molecular chaperone DnaJ; K03686 molecular chaperone DnaJ	-	-	5.3e-139	461	24.6	363
RIFOXYC2_FULL_PER-ii_58_32_1044	1146925	1147482	-	186	K06346	jag	spoIIIJ-associated protein	jag; jag protein; K06346 spoIIIJ-associated protein	-	-	7.1e-36	120.1	33.1	186
RIFOXYC2_FULL_PER-ii_58_32_1045	1147681	1147956	-	92	K03530	hupB	DNA-binding protein HU-beta	nucleoid DNA-binding protein	-	-	4.6e-34	114.2	20.8	92
RIFOXYC2_FULL_PER-ii_58_32_1046	1148309	1150666	+	786	K03168	topA	DNA topoisomerase I [EC:5.99.1.2]	DNA topoisomerase I; K03168 DNA topoisomerase I [EC:5.99.1.2]	-	-	5.8e-286	948.1	34	786
							tRNA (Trp)
RIFOXYC2_FULL_PER-ii_58_32_1047	1151076	1151360	+	95	K00571	E2.1.1.72	site-specific DNA-methyltransferase (adenine-specific) [EC:2.1.1.72]	hypothetical protein	-	-	0.0064	11.5	42.5	95
RIFOXYC2_FULL_PER-ii_58_32_1048	1151412	1152530	+	373	K05988	dexA	dextranase [EC:3.2.1.11]	hypothetical protein	-	-	2.9e-07	25	174.7	373
RIFOXYC2_FULL_PER-ii_58_32_1049	1152591	1153115	+	175	K11244	WSC	cell wall integrity and stress response component	hypothetical protein	MAPK signaling pathway - yeast	-	0.00016	17.1	90.7	175
RIFOXYC2_FULL_PER-ii_58_32_1050	1153188	1154138	+	317	K08259	lytM	lysostaphin [EC:3.4.24.75]	peptidase	-	-	8.5e-25	84.1	141.5	317
RIFOXYC2_FULL_PER-ii_58_32_1051	1154062	1155267	-	402	K01129	dgt	dGTPase [EC:3.1.5.1]	deoxyguanosinetriphosphate triphosphohydrolase; K01129 dGTPase [EC:3.1.5.1]	Purine metabolism	-	4.8e-104	345.1	46.6	402
RIFOXYC2_FULL_PER-ii_58_32_1052	1155349	1155972	+	208	K07454	K07454	putative restriction endonuclease	hypothetical protein	-	-	0.0022	13.2	15.2	208
RIFOXYC2_FULL_PER-ii_58_32_1053	1156331	1157053	-	241	K05810	yfiH	conserved hypothetical protein	hypothetical protein	-	-	1.2e-35	119.2	20.6	241
RIFOXYC2_FULL_PER-ii_58_32_1054	1157157	1157939	-	261	K17758	nnr	ADP-dependent NAD(P)H-hydrate dehydratase [EC:4.2.1.136]	carbohydrate kinase, yjef related protein	-	-	1.8e-58	194.5	53.2	261
RIFOXYC2_FULL_PER-ii_58_32_1055	1157964	1159076	-	371	K00786	E2.4.-.-	-	group 1 glycosyl transferase	-	-	6.3e-74	245.2	488.2	371
RIFOXYC2_FULL_PER-ii_58_32_1056	1159242	1160090	+	283	K03589	ftsQ	cell division protein FtsQ	hypothetical protein	Cell cycle - Caulobacter	-	2.6e-12	42.9	38.2	283
RIFOXYC2_FULL_PER-ii_58_32_1057	1160231	1161151	+	307	K07258	dacC, dacA, dacD	D-alanyl-D-alanine carboxypeptidase (penicillin-binding protein 5/6) [EC:3.4.16.4]	serine-type D-Ala-D-Ala carboxypeptidase (EC:3.4.16.4); K07258 D-alanyl-D-alanine carboxypeptidase (penicillin-binding protein 5/6) [EC:3.4.16.4]	Peptidoglycan biosynthesis	-	3.4e-78	259.7	24.1	307
RIFOXYC2_FULL_PER-ii_58_32_1058	1161167	1162189	+	341	K06194	nlpD	lipoprotein NlpD	peptidase M23 family protein	-	-	1.2e-42	142.6	46.1	341
RIFOXYC2_FULL_PER-ii_58_32_1059	1162271	1163485	-	405	K05685	macB	macrolide transport system ATP-binding/permease protein [EC:3.6.3.-]	antimicrobial peptide ABC transporter permease	ABC transporters	M00709	1.8e-123	409.3	150	405
RIFOXYC2_FULL_PER-ii_58_32_1060	1163643	1164308	-	222	K02003	ABC.CD.A	putative ABC transport system ATP-binding protein	ABC transporter-like protein; K02003 putative ABC transport system ATP-binding protein	-	M00258	3.1e-107	356.1	33.9	222
RIFOXYC2_FULL_PER-ii_58_32_1061	1164313	1166154	-	614	K02005	ABC.CD.TX	HlyD family secretion protein	RND family efflux transporter MFP subunit	-	-	3e-76	253	127.3	614
RIFOXYC2_FULL_PER-ii_58_32_1062	1166151	1166507	-	119	K03770	ppiD	peptidyl-prolyl cis-trans isomerase D [EC:5.2.1.8]	hypothetical protein	-	-	0.0038	11.4	126.8	119
RIFOXYC2_FULL_PER-ii_58_32_1063	1166674	1167339	+	222	K02483	K02483	two-component system, OmpR family, response regulator	Response regulator	-	-	1.2e-82	273.9	146.6	222
RIFOXYC2_FULL_PER-ii_58_32_1064	1167339	1168547	+	403	K02484	K02484	two-component system, OmpR family, sensor kinase [EC:2.7.13.3]	integral membrane sensor signal transduction histidine kinase (EC:2.7.13.3)	-	-	5.3e-72	239.5	31.8	403
RIFOXYC2_FULL_PER-ii_58_32_1065	1168620	1169150	+	177	K03195	virB10, lvhB10	type IV secretion system protein VirB10	hypothetical protein	Bacterial secretion system	M00333	6.1e-05	18.8	195.4	177
RIFOXYC2_FULL_PER-ii_58_32_1066	1169223	1169618	-	132	K15977	K15977	putative oxidoreductase (cytoplasmic membrane: psortb)	DoxX family protein; K15977 putative oxidoreductase	-	-	2e-25	86	15.3	132
RIFOXYC2_FULL_PER-ii_58_32_1067	1169925	1170380	-	152	K06956	K06956	COG: COG1823	hypothetical protein	-	-	0.00016	16.3	182	152
RIFOXYC2_FULL_PER-ii_58_32_1068	1170377	1171291	-	305	K16264	czcD, zitB	cobalt-zinc-cadmium efflux system protein	cobalt/zinc/cadmium cation efflux pump protein; K03295 cation efflux system protein, CDF family	-	-	2.5e-66	220.3	73.7	305
RIFOXYC2_FULL_PER-ii_58_32_1069	1171314	1171730	-	139	K06204	dksA	DnaK suppressor protein	hypothetical protein	-	-	0.00026	17.4	22.7	139
RIFOXYC2_FULL_PER-ii_58_32_1070	1171912	1172529	+	206	K08982	K08982	putative membrane protein	hypothetical protein; K08982 putative membrane protein	-	-	1.7e-22	75.9	28.4	206
RIFOXYC2_FULL_PER-ii_58_32_1071	1172537	1172863	+	109	K06039	ychN	uncharacterized protein involved in oxidation of intracellular sulfur	hypothetical protein	-	-	1.4e-26	88.8	26.1	109
							tRNA (Asp)
RIFOXYC2_FULL_PER-ii_58_32_1072	1173507	1173818	+	104	K05787	hupA	DNA-binding protein HU-alpha	hypothetical protein	-	-	0.0087	12.4	98.3	104
RIFOXYC2_FULL_PER-ii_58_32_1073	1173815	1175350	-	512	K02433	gatA, QRSL1	aspartyl-tRNA(Asn)/glutamyl-tRNA(Gln) amidotransferase subunit A [EC:6.3.5.6 6.3.5.7]	gatA; aspartyl/glutamyl-tRNA amidotransferase subunit A (EC:3.5.1.4); K02433 aspartyl-tRNA(Asn)/glutamyl-tRNA (Gln) amidotransferase subunit A [EC:6.3.5.6 6.3.5.7]	Aminoacyl-tRNA biosynthesis	-	3.7e-200	662.9	40.2	512
RIFOXYC2_FULL_PER-ii_58_32_1074	1175351	1175644	-	98	K02435	gatC, GATC	aspartyl-tRNA(Asn)/glutamyl-tRNA(Gln) amidotransferase subunit C [EC:6.3.5.6 6.3.5.7]	gatC; aspartyl-tRNA(Asn)/glutamyl-tRNA (Gln) amidotransferase subunit C (EC:6.3.5.6 6.3.5.7); K02435 aspartyl-tRNA(Asn)/glutamyl-tRNA (Gln) amidotransferase subunit C [EC:6.3.5.6 6.3.5.7]	Aminoacyl-tRNA biosynthesis	-	2.3e-26	88.6	20.5	98
RIFOXYC2_FULL_PER-ii_58_32_1075	1175761	1176177	+	139	K03536	rnpA	ribonuclease P protein component [EC:3.1.26.5]	hypothetical protein	-	-	4.5e-15	52	16.4	139
RIFOXYC2_FULL_PER-ii_58_32_1076	1176129	1177391	+	421	K03217	yidC, spoIIIJ, OXA1	YidC/Oxa1 family membrane protein insertase	stage III sporulation protein J; K03217 preprotein translocase subunit YidC	Bacterial secretion system Protein export	M00335	2.5e-67	223.4	43.7	421
RIFOXYC2_FULL_PER-ii_58_32_1077	1177502	1178572	-	357	K11645	fbaB	fructose-bisphosphate aldolase, class I [EC:4.1.2.13]	fbaB; fructose-bisphosphate aldolase class 1 (EC:4.1.2.13); K01623 fructose-bisphosphate aldolase, class I [EC:4.1.2.13]	Carbon fixation in photosynthetic organisms Fructose and mannose metabolism Glycolysis / Gluconeogenesis Methane metabolism Pentose phosphate pathway	M00001; M00003	6.9e-189	623.2	81.2	357
RIFOXYC2_FULL_PER-ii_58_32_1078	1178771	1179088	+	106	K03563	csrA	carbon storage regulator	Carbon storage regulator like protein; K03563 carbon storage regulator	Two-component system	-	1.6e-21	72.8	22.5	106
RIFOXYC2_FULL_PER-ii_58_32_1079	1179365	1179715	+	117	K03563	csrA	carbon storage regulator	carbon storage regulator CsrA; K03563 carbon storage regulator	Two-component system	-	4.4e-28	94.1	22.5	117
RIFOXYC2_FULL_PER-ii_58_32_1080	1179814	1181295	+	494	K01883	CARS, cysS	cysteinyl-tRNA synthetase [EC:6.1.1.16]	cysS; cysteinyl-tRNA synthetase; K01883 cysteinyl-tRNA synthetase [EC:6.1.1.16]	Aminoacyl-tRNA biosynthesis	M00359; M00360	5.7e-148	490.7	45.3	494
RIFOXYC2_FULL_PER-ii_58_32_1081	1181651	1181911	-	87	K03005	RPA49, POLR1E	DNA-directed RNA polymerase I subunit RPA49	hypothetical protein	Purine metabolism Pyrimidine metabolism RNA polymerase	M00182	0.00029	15.6	53.9	87
RIFOXYC2_FULL_PER-ii_58_32_1082	1182286	1186581	+	1432	K05988	dexA	dextranase [EC:3.2.1.11]	putative oligopeptide ABC transporter substrate binding protein	-	-	4.7e-11	37.5	174.7	1432
RIFOXYC2_FULL_PER-ii_58_32_1083	1186801	1187814	-	338	K12554	murN	alanine adding enzyme [EC:2.3.2.-]	pentaglycine interpeptide bridge formation protein	Peptidoglycan biosynthesis	-	1.1e-26	89.7	173.1	338
RIFOXYC2_FULL_PER-ii_58_32_1084	1187906	1188505	+	200	K04564	SOD2	superoxide dismutase, Fe-Mn family [EC:1.15.1.1]	sodA; Superoxide dismutase; K04564 superoxide dismutase, Fe-Mn family [EC:1.15.1.1]	FoxO signaling pathway Peroxisome	-	7.3e-90	297.7	16.7	200
RIFOXYC2_FULL_PER-ii_58_32_1085	1188755	1192642	+	1296	K03043	rpoB	DNA-directed RNA polymerase subunit beta [EC:2.7.7.6]	DNA-directed RNA polymerase subunit beta; K03043 DNA-directed RNA polymerase subunit beta [EC:2.7.7.6]	Purine metabolism Pyrimidine metabolism RNA polymerase	M00183	0	1581.7	81.4	1296
RIFOXYC2_FULL_PER-ii_58_32_1086	1192843	1193214	+	124	K03111	ssb	single-strand DNA-binding protein	single-strand binding protein; K03111 single-strand DNA-binding protein	DNA replication Homologous recombination Mismatch repair	-	2.5e-34	115	27.9	124
RIFOXYC2_FULL_PER-ii_58_32_1087	1193329	1193727	+	133	K03111	ssb	single-strand DNA-binding protein	single-strand binding protein; K03111 single-strand DNA-binding protein	DNA replication Homologous recombination Mismatch repair	-	2.2e-40	134.9	27.9	133
							Region includes 23S rRNA
RIFOXYC2_FULL_PER-ii_58_32_1088	1198790	1199320	+	177	-	-		hypothetical protein	-	-	-	-	-	177
RIFOXYC2_FULL_PER-ii_58_32_1089	1199324	1205230	+	1969	K07404	pgl	6-phosphogluconolactonase [EC:3.1.1.31]	hypothetical protein	Pentose phosphate pathway	M00004; M00006; M00008	2.1e-27	92.3	79	1969
RIFOXYC2_FULL_PER-ii_58_32_1090	1205278	1211532	-	2085	-	-	-	hypothetical protein	-	-	-	-	-	2085
RIFOXYC2_FULL_PER-ii_58_32_1091	1211628	1215644	-	1339	K15193	SPTY2D1, SPT2	protein SPT2	hypothetical protein	-	-	1.4e-06	24	29.6	1339
RIFOXYC2_FULL_PER-ii_58_32_1092	1215692	1216516	+	275	K06178	rluB	23S rRNA pseudouridine2605 synthase [EC:5.4.99.22]	pseudouridylate synthase; K06182 23S rRNA pseudouridine2604 synthase [EC:5.4.99.21]	-	-	2.2e-78	259.7	52.8	275
RIFOXYC2_FULL_PER-ii_58_32_1093	1216603	1218066	+	488	K07576	K07576	metallo-beta-lactamase family protein	hypothetical protein; K07576 metallo-beta-lactamase family protein	-	-	1.2e-167	555.6	120.1	488
RIFOXYC2_FULL_PER-ii_58_32_1094	1218188	1221835	+	1216	K11493	RCC1	regulator of chromosome condensation	hypothetical protein	-	-	6.9e-11	37.7	87.1	1216
RIFOXYC2_FULL_PER-ii_58_32_1095	1221841	1228146	+	2102	K17257	ITFG1	integrin alpha FG-GAP repeat containing protein 1	hypothetical protein	-	-	1.9e-33	111.6	37.6	2102
RIFOXYC2_FULL_PER-ii_58_32_1096	1228204	1232991	+	1596	K07762	PAPPA	pappalysin-1 [EC:3.4.24.79]	hypothetical protein	-	-	3.9e-14	47.1	216.9	1596
RIFOXYC2_FULL_PER-ii_58_32_1097	1233117	1236986	+	1290	K08647	PAPPA2	pappalysin-2 [EC:3.4.24.-]	hypothetical protein	-	-	5.8e-18	59.7	301.5	1290
RIFOXYC2_FULL_PER-ii_58_32_1098	1237014	1241546	+	1511	K17257	ITFG1	integrin alpha FG-GAP repeat containing protein 1	lipoprotein	-	-	3.3e-25	84.4	37.6	1511
RIFOXYC2_FULL_PER-ii_58_32_1099	1241628	1245161	+	1178	K07762	PAPPA	pappalysin-1 [EC:3.4.24.79]	hypothetical protein	-	-	3.9e-20	67	216.9	1178
RIFOXYC2_FULL_PER-ii_58_32_1102	1245239	1248103	+	581	K07762	PAPPA	pappalysin-1 [EC:3.4.24.79]	hypothetical protein	-	-	3.8e-21	70.4	216.9	581
