# Supplementary material for: Analysis of five complete genome sequences for members of the class Peribacteria in the recently recognized Peregrinibacteria bacterial phylum
Source: PeerJ. 2016 Jan 28;4:e1607. doi: 10.7717/peerj.1607 (PMC4736985; doi:10.7717/peerj.1607)
Supplement: Supplemental Information 3 [file peerj-04-1607-s003.xlsx]

## Sheet: Per-ii 16s rRNA matrix
Genome Name (Genbank Accession)	Lineage	16S rRNA gene identity to Candidatus Peribacter riflensis strain. RIFOXYC2_FULL_Per-ii_58_32 (CP013062) (%)
Candidatus Peribacter riflensis strain. RIFOXYA2_FULL_Per-ii_58_14 (CP013062)	Peribacteria	100
Candidatus Peribacter riflensis strain. RIFOXYB2_FULL_Per-ii_54_17 (CP013063)	Peribacteria	100
Candidatus Peribacter riflensis strain. RIFOXYC2_FULL_Per-ii_58_32 (CP013064)	Peribacteria	100
Candidatus Peribacter riflensis strain. RIFOXYD1_FULL_Per-ii_59_16 (CP013065)	Peribacteria	100
Candidatus Peribacter riflensis strain. RIFOXYD2_FULL_Per-ii_51_23 (CP013066)	Peribacteria	100
Peregrinibacteria bacterium GW2011_GWB1_54_5 (LCRQ00000000)	Peribacteria	88.199
Peregrinibacteria bacterium GW2011_GWC2_54_8 (LCRS00000000)	Peribacteria	88.199
Peregrinibacteria bacterium GW2011_GWA2_44_7 (LCJI00000000)	Peregrinibacteria	79.167
Peregrinibacteria bacterium GW2011_GWF2_33_10 (LBOP00000000)	Peregrinibacteria	78.736
Peregrinibacteria bacterium GW2011_GWC2_PER_33_13 (LBOR00000000)	Peregrinibacteria	78.736
Peregrinibacteria bacterium GW2011_GWF2_39_17 (LBWM00000000)	Peregrinibacteria	77.667
Peregrinibacteria bacterium GW2011_GWA2_33_10 (LBOO00000000)	Peregrinibacteria	77.466
Peregrinibacteria bacterium GW2011_GWF2_43_17 (LCFW00000000)	Peregrinibacteria	77.137	0.7764
Peregrinibacteria bacterium GW2011_GWC2_39_14 (LBWI00000000)	Peregrinibacteria	76.126
Peregrinibacteria bacterium GW2011_GWF2_38_29 (LBUS00000000)	Peregrinibacteria	76.057
Berkelbacteria bacterium GW2011_GWA2_35_9 (LBRB00000000)	Berkelbacteria	72.432
