# Supplementary material for: Analysis of five complete genome sequences for members of the class Peribacteria in the recently recognized Peregrinibacteria bacterial phylum
Source: PeerJ. 2016 Jan 28;4:e1607. doi: 10.7717/peerj.1607 (PMC4736985; doi:10.7717/peerj.1607)
Supplement: Supplemental Information 4 — Kegg Orthology (KO) numbers, and HMM-based predictions below trusted HMM thresholds are in italics and grey font. [file peerj-04-1607-s004.xlsx]

## Sheet: Sheet1
Supplementary Table S4. Genes in Ca. Peribacter riflensis strain.RIFOXYC2_FULL_PER-ii_58_32 with elevated cysteine content. Kegg Orthology (KO) numbers, and HMM-based predictions below trusted HMM thresholds are in italics and grey font.
ORF	Description	Cys count	% Cys	Protein length
RIFOXYC2_FULL_PER-ii_58_32_109	hypothetical protein	155	0.0991049	1564
RIFOXYC2_FULL_PER-ii_58_32_228	pappalysin-2 [EC:3.4.24.-]; hypothetical protein	66	0.0640777	1030
RIFOXYC2_FULL_PER-ii_58_32_229	kelch repeat and BTB domain-containing protein 8; putative lipoprotein	140	0.0626118	2236
RIFOXYC2_FULL_PER-ii_58_32_312	hypothetical protein	62	0.0235831	2629
RIFOXYC2_FULL_PER-ii_58_32_471	cytokinesis protein; hypothetical protein	107	0.0277202	3860
RIFOXYC2_FULL_PER-ii_58_32_482	pappalysin-1 [EC:3.4.24.79]; hypothetical protein	119	0.0679612	1751
RIFOXYC2_FULL_PER-ii_58_32_499	pappalysin-1 [EC:3.4.24.79]; hypothetical protein	63	0.0950226	663
RIFOXYC2_FULL_PER-ii_58_32_522	lipoprotein	219	0.0983827	2226
RIFOXYC2_FULL_PER-ii_58_32_679	pappalysin-1 [EC:3.4.24.79]; hypothetical protein	67	0.063148	1061
RIFOXYC2_FULL_PER-ii_58_32_804	pappalysin-2 [EC:3.4.24.-]; hypothetical protein	98	0.0804598	1218
RIFOXYC2_FULL_PER-ii_58_32_1089	6-phosphogluconolactonase [EC:3.1.1.31]; hypothetical protein	163	0.0828252	1968
RIFOXYC2_FULL_PER-ii_58_32_1090	hypothetical protein	238	0.114203	2084
RIFOXYC2_FULL_PER-ii_58_32_1091	protein SPT2; hypothetical protein	126	0.0941704	1338
RIFOXYC2_FULL_PER-ii_58_32_1094	regulator of chromosome condensation; hypothetical protein	70	0.0576132	1215
RIFOXYC2_FULL_PER-ii_58_32_1095	integrin alpha FG-GAP repeat containing protein 1; hypothetical protein	110	0.052356	2101
RIFOXYC2_FULL_PER-ii_58_32_1096	pappalysin-1 [EC:3.4.24.79]; hypothetical protein	136	0.0852665	1595
RIFOXYC2_FULL_PER-ii_58_32_1097	pappalysin-2 [EC:3.4.24.-]; hypothetical protein	78	0.060512	1289
RIFOXYC2_FULL_PER-ii_58_32_1098	integrin alpha FG-GAP repeat containing protein 1; lipoprotein	72	0.0476821	1510
RIFOXYC2_FULL_PER-ii_58_32_1099	pappalysin-1 [EC:3.4.24.79]; hypothetical protein	98	0.0832625	1177
RIFOXYC2_FULL_PER-ii_58_32_1102	pappalysin-1 [EC:3.4.24.79]; hypothetical protein	56	0.0965517	580
